# Supplementary material for: Asymmetric total synthesis of (+)-dihydroitomanallene B and formal synthesis of (−)-kumausallene
Source: Royal Society of Chemistry journal article supplement (doi:10.1039/d2cc04574e), 2022-01-01
Supplement: d2cc04574e1.pdf [file d2cc04574e1.pdf]

## Supporting Information

### Asymmetric Total Synthesis of (+)-Dihydroitomanallene B and Formal Synthesis of (–)-Kumausallene

Rodney A. Fernandes,\* Atul Kumar and Ramdas S. Pathare

Department of Chemistry, Indian Institute of Technology Bombay, Powai, Mumbai 400076,  
Maharashtra, India

Email: [rfernand@chem.iitb.ac.in](mailto:rfernand@chem.iitb.ac.in)

#### Table of Contents

|     |                                                                                         |         |
|-----|-----------------------------------------------------------------------------------------|---------|
| 1   | General information                                                                     | S2      |
| 2.  | Procedure for preparation and data of <b>8a, 8b, 18, 19, 9a, 9b, 20a, 20b, 21a, 21b</b> | S2-S7   |
| 3.  | Procedure for preparation and data of <b>7a</b> and <b>7b</b>                           | S7-S8   |
| 4.  | Procedure for preparation and data of <b>22b</b> and <b>22a</b>                         | S8-S9   |
| 5.  | Plausible paths for diastereoselectivity                                                | S10     |
| 6.  | Procedure for preparation and data of <b>12a, 12b, 6b, 13a, 14a, 15a, 4'</b>            | S10-S15 |
| 7.  | Procedure for preparation and data of <b>6a, 13b, 14b, 15b, 4, 4''</b>                  | S15-S17 |
| 11. | Procedure for preparation and data of <b>16, 17, 11</b>                                 | S17-S19 |
| 12. | X-ray data of <b>22a</b> and <b>22b</b>                                                 | S19-S23 |
| 13. | References                                                                              | S24     |
| 14. | <sup>1</sup> H and <sup>13</sup> C NMR spectra of all compounds                         | S25-S60 |

## Experimental Data

### General Information

IR spectra were obtained on a Bruker Tensor 27 FT-IR spectrometer by evaporating compounds dissolved in CHCl<sub>3</sub> on CsCl pellets. <sup>1</sup>H NMR and <sup>13</sup>C NMR were recorded with the Bruker Avance III HD and Bruker Avance III 400 spectrometers operating at 500 or 400 and 125 or 100 MHz for proton and carbon nuclei, respectively. The chemical shifts are based on the CDCl<sub>3</sub> peaks at δ = 7.26 ppm for proton NMR and δ = 77.00 ppm (t) for carbon NMR. HRMS (ESI-TOF) spectra were recorded on Bruker Maxis Impact Sr no.282001.0008 spectrometer using positive electrospray ionization by the TOF method. Solvents were dried by using standard procedures. Tetrahydrofuran (THF) solvent was dried over sodium metal and CH<sub>2</sub>Cl<sub>2</sub> by refluxing with CaH<sub>2</sub>. Thin-layer chromatography was performed on EM 250 Kieselgel 60 F254 silica gel plates. The spots were visualized by staining with KMnO<sub>4</sub> or by using a UV lamp. For all reactions requiring heating, an oil bath was used.

**Synthesis of β,γ-oxygenated allyl acetates 8a and 8b:** The Sharpless asymmetric dihydroxylation<sup>1</sup> of (*E*)-β,γ-unsaturated ester **19** (prepared from **18**<sup>2</sup>) with (DHQD)<sub>2</sub>PHAL provided the γ-lactone **9a**,<sup>1c</sup> which upon β-OH TBS protection delivered **9b** (Scheme S1). The DIBAL-H reduction of **9a** and **9b** to the lactols and subsequent Wittig olefination provided the esters **20a** and **20b**, respectively. These were next reduced to allyl alcohols (**21a** and **21b**) and then chemoselective acylation of primary OH furnished the β,γ-oxygenated allyl acetates **8b** and **8a**, respectively.

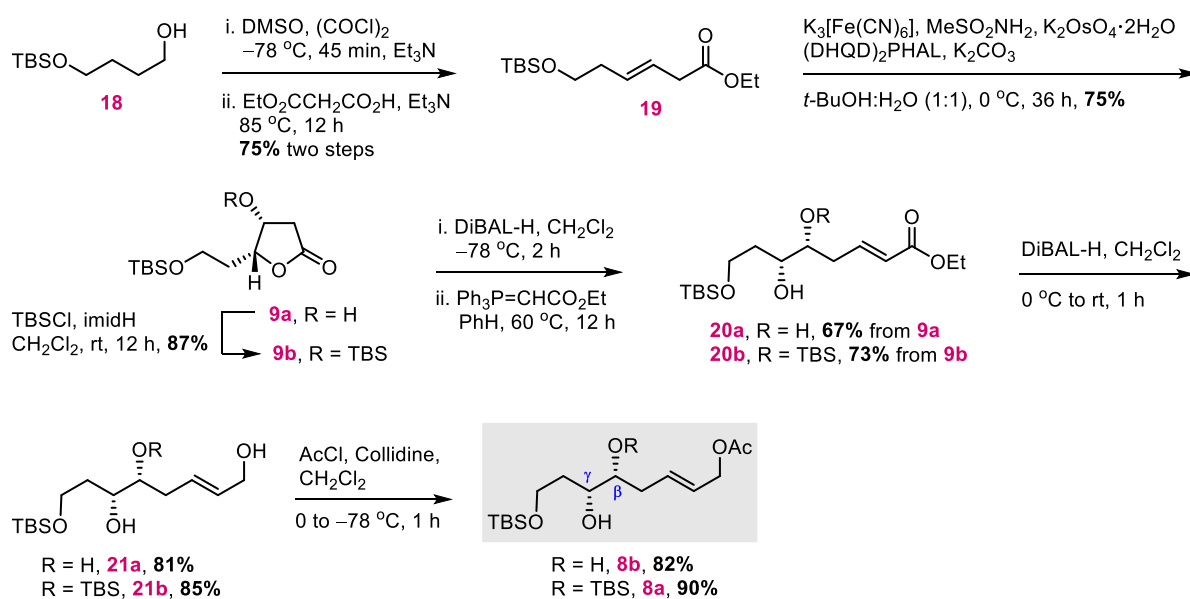

**Scheme S1** Synthesis of β,γ-oxygenated allyl acetates **8a** and **8b** for Tsuji-Trost cyclization.

#### 4-(*tert*-Butyldimethylsilyloxy)butan-1-ol (**18**):<sup>2</sup>

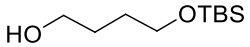 To a solution of 1,4-butanediol (4.0 g, 44.4 mmol) in THF (100 mL) at 0 °C was added NaH (1.78 g, 60% dispersion in mineral oil, 44.4 mmol, 1.0 equiv). The reaction mixture was stirred at 0 °C for 30 min, then warmed to room temperature and stirred for 2 h. *tert*-Butylchlorodimethylsilane (6.7 g, 44.4 mmol, 1.0equiv) was then added and the solution was stirred at room temperature for 14 h. The reaction mixture was poured into water (50 mL) and extracted with Et<sub>2</sub>O (3 × 50 mL). The combined organic phases were dried (Na<sub>2</sub>SO<sub>4</sub>) and the solvent was removed by rotary evaporation. The resulting residue was purified by silica gel flash chromatography using petroleum ether/EtOAc (7:3) as eluent to give alcohol **18** (8.44 g, 93%) as colorless oil. IR (CHCl<sub>3</sub>):  $\nu_{\max}$  = 3344, 2929, 2859, 1471, 1389, 1255, 1099, 1054, 940, 878, 838, 775, 709, 665 cm<sup>-1</sup>. <sup>1</sup>H NMR (500 MHz, CDCl<sub>3</sub>):  $\delta$  = 3.66–3.61 (m, 4H), 2.63 (brs, 1H), 1.66–1.60 (m, 4H), 0.88 (s, 9H), 0.05 (s, 6H) ppm. <sup>13</sup>C{<sup>1</sup>H} NMR (125 MHz, CDCl<sub>3</sub>):  $\delta$  = 63.3, 62.7, 30.1, 29.8, 25.9, 18.3, –5.5 ppm. HRMS (ESI-TOF)  $m/z$ : [M + H]<sup>+</sup> Calcd for C<sub>10</sub>H<sub>25</sub>O<sub>2</sub>Si 205.1619; Found 205.1626.

#### Ethyl (*E*)-6-(*tert*-butyldimethylsilyloxy)hex-3-enoate (**19**):

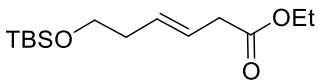 To a solution of DMSO (4.2 mL, 58.7 mmol, 3.0 equiv) in CH<sub>2</sub>Cl<sub>2</sub> (100 mL) at –78 °C was added oxalyl chloride (2.5 mL, 29.35 mmol, 1.5 equiv). The resulting solution was stirred for 15 min and then the solution of alcohol **18** (4.0 g, 19.57 mmol) in CH<sub>2</sub>Cl<sub>2</sub> (10 mL) was added and stirring continued for 45 min. It was then quenched with Et<sub>3</sub>N (11 mL, 78.28 mmol, 4.0 equiv), stirred for 30 min and saturated aq. NaHCO<sub>3</sub> (50 mL) was added. The solution was extracted with CH<sub>2</sub>Cl<sub>2</sub> (3 × 40 mL) and the combined organic layers were washed with water, brine, dried (Na<sub>2</sub>SO<sub>4</sub>) and concentrated. The crude aldehyde (4.0 g) was used without purification for next step.

A mixture of aldehyde (4.0 g), Et<sub>3</sub>N (2.7 mL, 19.57 mmol, 1.0 equiv) and monoethyl malonate (2.58 g, 19.57 mmol, 1.0 equiv) was heated at 85 °C under nitrogen atmosphere. After stirring for 12 h, the reaction mixture was cooled to room temperature and poured at 0 °C into aq. H<sub>2</sub>SO<sub>4</sub> solution (20%, 100 mL). The organic phase was separated and the aqueous phase was extracted with EtOAc (3 × 100 mL). The combined organic layers were washed with water, brine, dried (Na<sub>2</sub>SO<sub>4</sub>) and concentrated under vacuum. Silica gel column chromatography of the crude product using petroleum ether/EtOAc (19:1) as eluent gave  $\beta,\gamma$ -unsaturated ester **19** (4.0 g, 75%) as colorless oil. IR (CHCl<sub>3</sub>):  $\nu_{\max}$  = 2930, 2858, 1738, 1472, 1256, 1160, 1098, 1031, 970, 836, 776 cm<sup>-1</sup>. <sup>1</sup>H NMR (400 MHz, CDCl<sub>3</sub>):  $\delta$  = 5.61–5.53 (m, 2H), 4.12 (q,  $J$  = 7.2 Hz, 2H), 3.62 (t,  $J$  = 6.8 Hz, 2H), 3.01 (d,  $J$  = 5.2 Hz, 2H), 2.24 (dd,  $J$  = 12.0, 6.0 Hz, 2H), 1.24 (t,  $J$  = 7.2 Hz, 3H), 0.87 (s, 9H), 0.03 (s, 6H) ppm. <sup>13</sup>C{<sup>1</sup>H} NMR (100 MHz, CDCl<sub>3</sub>):  $\delta$  = 172.0, 130.9, 123.7, 62.8, 60.5, 38.2, 36.1, 25.9, 18.3, 14.1, –5.3 ppm. HRMS (ESI-TOF)  $m/z$ : [M + Na]<sup>+</sup> Calcd for C<sub>14</sub>H<sub>28</sub>O<sub>3</sub>SiNa 295.1700; Found 295.1686.

**(4*R*,5*R*)-5-(2-*tert*-Butyldimethylsilyloxyethyl)-4-hydroxydihydrofuran-2(3*H*)-one (9a):**

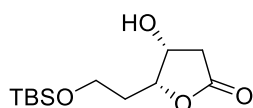

To a mixture of  $K_3Fe(CN)_6$  (11.42 g, 35.23 mmol, 3.0 equiv),  $K_2CO_3$  (4.87 g, 35.23 mmol, 3.0 equiv) and  $(DHQD)_2PHAL$  (110 mg, 0.141 mmol, 1.2 mol%) in *t*-BuOH/ $H_2O$  (1:1, 40 mL) cooled at 0 °C was added  $K_2OsO_4 \cdot 2H_2O$  (25.9 mg, 0.07 mmol, 0.6 mol%) followed by  $MeSO_2NH_2$  (1.12 g 11.74 mmol, 1.0 equiv). After stirring for 5 min at 0 °C, the olefin **19** (3.2 g, 11.74 mmol) was added in one portion. The reaction mixture was stirred at 0 °C for 36 h and then quenched with solid  $Na_2SO_3$  (0.6 g). The stirring was continued for an additional 45 min and then the solution was extracted with EtOAc ( $5 \times 30$  mL). The combined organic layers were washed with brine, dried ( $Na_2SO_4$ ) and concentrated. Silica gel column chromatography of the crude product using petroleum ether/EtOAc (7:3) as eluent gave the lactone **9a** (2.29 g, 75%) as colorless oil.  $[\alpha]_D^{25} +81.0$  (*c* 1.0,  $CHCl_3$ ). IR ( $CHCl_3$ ):  $\nu_{max} = 3433, 2955, 1767, 1475, 1359, 1257, 1168, 1087, 1017, 958, 837, 778, 692$   $cm^{-1}$ .  $^1H$  NMR (400 MHz,  $CDCl_3$ ):  $\delta = 4.45$  (d,  $J = 5.0$  Hz, 2H), 3.89–3.85 (m, 1H), 3.67 (td,  $J = 11.0, 2.2$  Hz, 1H), 2.77 (dd,  $J = 18.0, 5.3$  Hz, 1H), 2.56 (d,  $J = 18.0$  Hz, 1H), 2.25–2.09 (m, 2H), 0.90 (s, 9H), 0.10 (s, 3H), 0.10 (s, 3H) ppm.  $^{13}C\{^1H\}$  NMR (100 MHz,  $CDCl_3$ ):  $\delta = 175.5, 84.0, 68.5, 59.4, 37.8, 30.7, 25.7, 18.1, -5.7, -5.72$  ppm. HRMS (ESI-TOF)  $m/z$ :  $[M + Na]^+$  Calcd for  $C_{12}H_{24}O_4SiNa$  283.1336; Found 283.1341.

**4-(*tert*-Butyldimethylsilyloxy)-5-(2-*tert*-butyldimethylsilyloxyethyl)dihydrofuran-2(3*H*)-one (9b):**

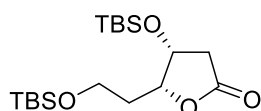

To a solution of alcohol **9a** (6.0 g, 2.3 mmol) in dry  $CH_2Cl_2$  (60 mL) under argon was added imidazole (2.35 g, 3.45 mmol, 1.5 equiv) at 0 °C and the reaction mixture stirred for 30 min. *tert*-Butylchlorodimethylsilane (5.21 g, 3.45 mmol, 1.5 equiv) was then added and stirring continued for another 12 h at room temperature. The reaction mixture was diluted with  $CH_2Cl_2$  (20 mL),  $H_2O$  (50 mL) and the organic layer separated. The aqueous layer was extracted with  $CH_2Cl_2$  ( $2 \times 30$  mL) and the combined organic phases were washed with water, brine, dried ( $Na_2SO_4$ ) and concentrated. The residue was purified by silica gel column chromatography using petroleum ether/EtOAc (9:1) as eluent to give **9b** (7.5 g, 87%) as colorless oil.  $[\alpha]_D^{25} +35.6$  (*c* 1.0,  $CHCl_3$ ). IR ( $CHCl_3$ ):  $\nu_{max} = 2954, 2930, 2888, 2858, 1777, 1472, 1463, 1407, 1389, 1362, 1293, 1257, 1206, 1162, 1094, 1019, 1007, 957, 939, 912, 836, 809, 777, 735, 671, 664, 648$   $cm^{-1}$ .  $^1H$  NMR (400 MHz,  $CDCl_3$ ):  $\delta = 4.62$ –4.58 (m, 1H), 4.42 (t,  $J = 4.0$  Hz, 1H), 3.77 (dd,  $J = 7.2, 4.4$  Hz, 2H), 2.74 (dd,  $J = 17.2, 5.2$  Hz, 1H), 2.43 (d,  $J = 17.2$  Hz, 1H), 2.04–1.96 (m, 1H), 1.83–1.75 (m, 1H), 0.89 (s, 8H), 0.88 (s, 9H), 0.05 (s, 12H) ppm.  $^{13}C\{^1H\}$  NMR (100 MHz,  $CDCl_3$ ):  $\delta = 175.5, 81.7, 69.9, 59.2, 39.9, 32.4, 25.9, 25.6, 18.3, 18.0, -4.7, -5.4$  ppm. HRMS (ESI-TOF)  $m/z$ :  $[M + Na]^+$  Calcd for  $C_{18}H_{38}O_4Si_2Na$  397.2201; Found 397.2202.

**Ethyl (5*R*,6*R*,*E*)-8-((*tert*-butyldimethylsilyloxy)-5,6-dihydroxyoct-2-enoate (20a):**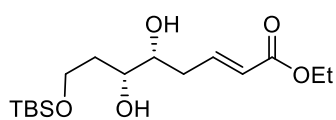

To a cooled solution of lactone **9a** (2.0 g, 7.68 mmol) in dry CH<sub>2</sub>Cl<sub>2</sub> (40 mL) under argon atmosphere was added DIBAL-H (11 mL, 15.4 mmol, 1.4 M solution in toluene, 2.0 equiv) dropwise over a period of 15 min at -78 °C. The reaction mixture was stirred at -78 °C for 2 h until all starting material is consumed. The reaction was quenched with saturated aq. solution of Rochelle's salt (6 mL). Stirring was continued for 2 h at room temperature and then the aqueous layer was extracted with CH<sub>2</sub>Cl<sub>2</sub> (3 × 20 mL). The combined organic layers were washed with water, brine, dried (Na<sub>2</sub>SO<sub>4</sub>) and concentrated to give the crude lactol (2.0 g), which was used for the next reaction without further purification.

To a stirred solution of ethyl (triphenylphosphoranylidene)acetate (4.01 g, 11.52 mmol, 1.5 equiv) in benzene (20 mL) was added a solution of above lactol (2.0 g) in dry benzene (20 mL) and the mixture stirred for 12 h at 60 °C. It was then quenched with saturated aq. NH<sub>4</sub>Cl (10 mL) and the solution extracted with EtOAc (3 × 20 mL). The combined organic layers were washed with water, brine, dried (Na<sub>2</sub>SO<sub>4</sub>) and concentrated. The residue was purified by silica gel column chromatography using petroleum ether/EtOAc (4:1) as eluent to give **20a** (1.71 g, 67%) as colorless oil.  $[\alpha]_D^{25}$  -2.6 (*c* 1.0, CHCl<sub>3</sub>). IR (CHCl<sub>3</sub>):  $\nu_{\max}$  = 3447, 2959, 1715, 1439, 1283, 1056, 797, 593 cm<sup>-1</sup>. <sup>1</sup>H NMR (400 MHz, CDCl<sub>3</sub>):  $\delta$  = 7.04–6.96 (m, 1H), 5.90 (d, *J* = 15.2 Hz, 1H), 4.17 (q, *J* = 7.2 Hz, 2H), 3.91–3.81 (m, 2H), 3.74–3.70 (m, 1H), 3.60–3.56 (m, 1H), 2.75 (brs, 2H), 2.45–2.41 (m, 2H), 1.86–1.77 (m, 1H), 1.69–1.63 (m, 1H), 1.27 (t, *J* = 7.0 Hz, 3H), 0.89 (s, 9H), 0.07 (s, 6H) ppm. <sup>13</sup>C{<sup>1</sup>H} NMR (100 MHz, CDCl<sub>3</sub>):  $\delta$  = 166.4, 145.3, 123.6, 73.5, 73.0, 62.0, 60.3, 36.5, 35.0, 25.8, 18.1, 14.3, -5.55, -5.6 ppm. HRMS (ESI-TOF) *m/z*: [M + Na]<sup>+</sup> Calcd for C<sub>16</sub>H<sub>32</sub>O<sub>5</sub>SiNa 355.1911; Found 355.1914.

**Ethyl (5*R*,6*R*,*E*)-5,8-bis((*tert*-butyldimethylsilyloxy)-6-hydroxyoct-2-enoate (20b):**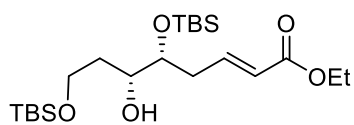

The titled compound was prepared from lactone **9b** (0.75 g, 2.0 mmol) by following a similar procedure as described for **20a** to give **20b** (0.653 g, 73%) as colorless oil.  $[\alpha]_D^{25}$  +0.2 (*c* 1.0, CHCl<sub>3</sub>). IR (CHCl<sub>3</sub>):  $\nu_{\max}$  = 3407, 2954, 2930, 2888, 2857, 1742, 1472, 1463, 1386, 1363, 1255, 1093, 1007, 971, 939, 913, 871, 2928, 2889, 2857, 1740, 1608, 1572, 1471, 1462, 1402, 1387, 1361, 1092, 1006, 972, 878, 836, 813, 776, 757, 726, 666 cm<sup>-1</sup>. <sup>1</sup>H NMR (400 MHz, CDCl<sub>3</sub>):  $\delta$  = 6.98–6.90 (m, 1H), 5.85 (d, *J* = 15.6 Hz, 1H), 4.16 (q, *J* = 7.2 Hz, 2H), 3.88–3.77 (m, 1H), 3.76–3.74 (m, 1H), 3.73–3.68 (m, 2H), 2.59–2.53 (m, 1H), 2.36–2.25 (m, 2H), 1.69–1.62 (m, 2H), 1.26 (t, *J* = 8.0 Hz, 3H), 0.88 (s, 9H), 0.87 (s, 9H), 0.06 (s, 12H) ppm. <sup>13</sup>C{<sup>1</sup>H} NMR (100 MHz, CDCl<sub>3</sub>):  $\delta$  = 166.3, 145.8, 123.5, 73.8, 72.6, 61.8, 60.1, 35.8, 34.5, 25.84, 25.8, 18.1, 18.0, 14.2, -4.6, -5.5 ppm. HRMS (ESI-TOF) *m/z*: [M + K]<sup>+</sup> Calcd for C<sub>22</sub>H<sub>46</sub>O<sub>5</sub>Si<sub>2</sub>K 485.2515; Found 485.2511.

**(5*R*,6*R*,*E*)-8-(*tert*-Butyldimethylsilyloxy)oct-2-ene-1,5,6-triol (21a):**

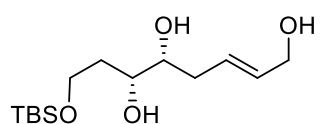

To a stirred solution of  $\alpha,\beta$ -unsaturated ester **20a** (1.7 g, 5.11 mmol) in dry  $\text{CH}_2\text{Cl}_2$  (25 mL) at 0 °C under argon atmosphere was added dropwise DiBAL-H (11 mL, 15.34 mmol, 1.4 M solution in toluene, 3.0 equiv). The reaction mixture was stirred for 30 min, warmed to room temperature and stirred for additional 30 min. It was then quenched with a saturated aq. solution of Rochelle's salt (20 mL), stirred for 2 h and then extracted with EtOAc (3  $\times$  30 mL). The combined organic layers were washed with water, brine, dried ( $\text{Na}_2\text{SO}_4$ ) and concentrated. The residue was purified by silica gel column chromatography using petroleum ether/EtOAc (1:1) as eluent to give **21a** (1.2 g, 81%) as colorless oil.  $[\alpha]_{\text{D}}^{25}$   $-2.9$  ( $c$  1.0,  $\text{CHCl}_3$ ). IR ( $\text{CHCl}_3$ ):  $\nu_{\text{max}}$  = 3393, 2955, 2930, 2858, 1732, 1471, 1375, 1255, 1098, 1005, 972, 938, 837, 758, 666, 608  $\text{cm}^{-1}$ .  $^1\text{H}$  NMR (500 MHz,  $\text{CDCl}_3$ ):  $\delta$  = 5.75–5.67 (m, 2H), 5.32 (brs, 1H), 4.14–4.09 (m, 2H), 3.90–3.81 (m, 2H), 3.73–3.71 (m, 1H), 3.52–3.48 (m, 1H), 2.56 (brs, 2H), 2.37–2.20 (m, 2H), 1.82–1.66 (m, 2H), 0.90 (s, 9H), 0.08 (s, 6H) ppm.  $^{13}\text{C}\{^1\text{H}\}$  NMR (125 MHz,  $\text{CDCl}_3$ ):  $\delta$  = 131.9, 128.9, 73.7, 73.5, 63.5, 62.0, 36.5, 35.1, 25.6, 18.1, 18.0,  $-3.6$ ,  $-5.6$  ppm. HRMS (ESI-TOF)  $m/z$ :  $[\text{M} + \text{Na}]^+$  Calcd for  $\text{C}_{14}\text{H}_{30}\text{O}_4\text{SiNa}$  313.1806; Found 313.1799.

**(5*R*,6*R*,*E*)-5,8-bis(*tert*-Butyldimethylsilyloxy)oct-2-ene-1,6-diol (21b):**

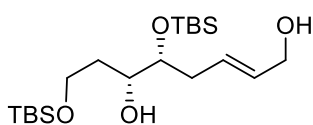

The titled compound was prepared from  $\alpha,\beta$ -unsaturated ester **20b** (2.5 g, 5.59 mmol) by following a similar procedure as described for **21a** to give **21b** (1.92 g, 85%) as colorless oil.  $[\alpha]_{\text{D}}^{25}$   $-49.4$  ( $c$  1.0,  $\text{CHCl}_3$ ). IR ( $\text{CHCl}_3$ ):  $\nu_{\text{max}}$  = 3374, 2929, 2950, 2885, 2857, 1472, 1463, 1407, 1389, 1362, 1255, 1185, 1095, 1006, 973, 938, 836, 813, 776, 735, 668  $\text{cm}^{-1}$ .  $^1\text{H}$  NMR (400 MHz,  $\text{CDCl}_3$ ):  $\delta$  = 5.69–5.67 (m, 2H), 4.07 (d,  $J$  = 3.6 Hz, 2H), 4.08–3.73 (m, 2H), 3.69 (brs, 1H), 3.62–3.58 (m, 1H), 2.73 (brs, 1H), 2.46–2.40 (m, 1H), 2.19–2.12 (m, 1H), 1.66–1.64 (m, 2H), 0.88 (s, 18H), 0.06 (s, 12H) ppm.  $^{13}\text{C}\{^1\text{H}\}$  NMR (100 MHz,  $\text{CDCl}_3$ ):  $\delta$  = 131.7, 129.0, 74.6, 71.6, 63.6, 61.5, 36.1, 35.4, 25.9, 25.8, 18.2, 18.1,  $-4.2$ ,  $-4.6$ ,  $-5.4$  ppm. HRMS (ESI-TOF)  $m/z$ :  $[\text{M} + \text{Na}]^+$  Calcd for  $\text{C}_{20}\text{H}_{44}\text{O}_4\text{Si}_2\text{Na}$  427.2670; Found 427.2667.

**(5*R*,6*R*,*E*)-8-(*tert*-Butyldimethylsilyloxy)-5,6-dihydroxyoct-2-en-1-yl acetate (8b):**

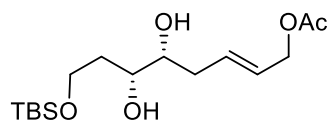

To a stirred solution of allyl alcohol **21a** (1.2 g, 4.13 mmol) in dry  $\text{CH}_2\text{Cl}_2$  (25 mL) at 0 °C was added 2,3,5-collidine (1.1 mL, 8.26 mmol, 2.0 equiv) and the reaction mixture was stirred for 15 min. It was then cooled to  $-78$  °C and acetyl chloride (0.35 mL, 4.96 mmol, 1.2 equiv) was added dropwise. The reaction mixture was stirred for 1 h and then warmed to room temperature. It was quenched with water (10 mL) and extracted with  $\text{CH}_2\text{Cl}_2$  (3  $\times$  20 mL). The combined organic layers were washed with water, brine, dried ( $\text{Na}_2\text{SO}_4$ ) and concentrated. The residue was purified by silica gel column chromatography using petroleum ether/EtOAc (7:3) as eluent to give **8b** (1.12 g, 82%) as colorless oil.  $[\alpha]_{\text{D}}^{25}$   $+1.0$  ( $c$  1.0,  $\text{CHCl}_3$ ). IR

(CHCl<sub>3</sub>):  $\nu_{\max}$  = 3451, 2931, 2858, 1739, 1613, 1572, 1471, 1383, 1362, 1249, 1104, 1027, 968, 939, 838, 757, 666, 608, 531 cm<sup>-1</sup>. <sup>1</sup>H NMR (400 MHz, CDCl<sub>3</sub>):  $\delta$  = 5.86–5.79 (m, 1H), 5.69–5.62 (m, 1H), 4.51 (d,  $J$  = 6.4 Hz, 2H), 3.90–3.80 (m, 2H), 3.72–3.68 (m, 1H), 3.51–3.47 (m, 1H), 2.83 (brs, 2H), 2.38–2.20 (m, 2H), 2.04 (s, 3H), 1.82–1.73 (m, 1H), 1.69–1.63 (m, 1H), 0.88 (s, 9H), 0.07 (s, 6H) ppm. <sup>13</sup>C{<sup>1</sup>H} NMR (100 MHz, CDCl<sub>3</sub>):  $\delta$  = 170.9, 132.1, 126.6, 73.5, 73.3, 65.0, 61.9, 36.5, 35.1, 25.8, 21.0, 18.1, –5.6, –5.61 ppm. HRMS (ESI-TOF)  $m/z$ : [M + K]<sup>+</sup> Calcd for C<sub>16</sub>H<sub>32</sub>O<sub>5</sub>SiK 371.1651; Found 371.1651.

**(5*R*,6*R*,*E*)-5,8-bis(*tert*-Butyldimethylsilyloxy)-6-hydroxyoct-2-en-1-yl acetate (8a):**

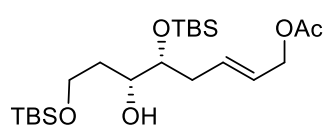

The titled compound was prepared from allyl alcohol **21b** (4.7 g, 11.61 mmol) by following a similar procedure as described for **8b** to give **8a** (4.67 g, 90%) as colorless oil.  $[\alpha]_{\text{D}}^{25}$  +0.2 ( $c$  1.0, CHCl<sub>3</sub>). IR (CHCl<sub>3</sub>):  $\nu_{\max}$  = 3407, 2954, 2930, 2888, 2857, 1742, 1472, 1463, 1386, 1363, 1255, 1093, 1007, 971, 939, 913, 871, 836, 812, 776, 734, 668 cm<sup>-1</sup>. <sup>1</sup>H NMR (400 MHz, CDCl<sub>3</sub>):  $\delta$  = 5.78–5.71 (m, 1H), 5.64–5.57 (m, 1H), 4.49 (d,  $J$  = 6.0 Hz, 2H), 3.86–3.81 (m, 1H), 3.78–3.72 (m, 1H), 3.70–3.67 (m, 1H), 3.61 (dd,  $J$  = 10.0, 5.2 Hz, 1H), 2.46–2.40 (m, 2H), 2.18–2.12 (m, 1H), 2.04 (s, 3H), 1.65–1.58 (m, 2H), 0.88 (s, 18H), 0.05 (s, 12H) ppm. <sup>13</sup>C{<sup>1</sup>H} NMR (100 MHz, CDCl<sub>3</sub>):  $\delta$  = 170.8, 132.3, 126.4, 74.4, 71.9, 65.0, 61.6, 36.0, 35.0, 25.9, 25.8, 20.9, 18.2, 18.0, –4.3, –4.6, –5.5 ppm. HRMS (ESI-TOF)  $m/z$ : [M + Na]<sup>+</sup> Calcd for C<sub>22</sub>H<sub>46</sub>O<sub>5</sub>Si<sub>2</sub>Na 469.2776; Found 469.2771.

**(2*R*,3*R*,5*S*)-2-(2-*tert*-Butyldimethylsilyloxyethyl)-5-vinyltetrahydrofuran-3-ol (7b):**

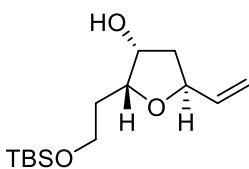

To a solution of allylacetate **8b** (66.7 mg, 0.2 mmol) in THF (4 mL) was added Pd(OAc)<sub>2</sub> (4.5 mg, 0.02 mmol, 0.1 equiv), PPh<sub>3</sub> (26.2 mg, 0.1 mmol, 0.5 equiv) and pyridine (12.7 mg, 0.16 mmol, 0.8 equiv). The reaction mixture was stirred at 50 °C for 1 h and then filtered through a pad of silica gel and the filtrate concentrated. The crude residue was purified by silica gel column chromatography using petroleum ether/EtOAc (3:1) as eluent to give **7b** (52.4 mg, 96%, *trans*:*cis* = 11:1 by <sup>1</sup>H NMR) as colorless oil.  $[\alpha]_{\text{D}}^{25}$  –2.0 ( $c$  1.0, CHCl<sub>3</sub>). IR (CHCl<sub>3</sub>):  $\nu_{\max}$  = 3429, 2955, 2930, 2858, 1645, 1471, 1256, 1093, 835, 812, 777, 666 cm<sup>-1</sup>. <sup>1</sup>H NMR (500 MHz, CDCl<sub>3</sub>):  $\delta$  = 5.87–5.78 (m, 1H), 5.25 (td,  $J$  = 17.1, 1.4 Hz, 1H), 5.10–5.08 (m, 1H), 4.65–4.61 (m, 1H), 4.31 (t,  $J$  = 4.3 Hz, 1H), 4.0–3.97 (m, 1H), 3.84–3.80 (m, 1H), 3.61 (td,  $J$  = 10.7, 2.0 Hz, 1H), 2.20–2.16 (m, 1H), 2.09–2.01 (m, 1H), 1.96–1.91 (m, 1H), 1.87–1.81 (m, 1H), 0.91 (s, 9H), 0.09 (s, 3H), 0.09 (s, 3H) ppm. <sup>13</sup>C{<sup>1</sup>H} NMR (125 MHz, CDCl<sub>3</sub>):  $\delta$  = 139.0, 115.6, 82.9, 78.3, 72.9, 60.1, 41.1, 32.1, 25.8, 18.1, –5.66, –5.7 ppm. HRMS (ESI-TOF)  $m/z$ : [M + H]<sup>+</sup> Calcd for C<sub>14</sub>H<sub>28</sub>O<sub>3</sub>SiNa 295.1700; Found 295.1696.

***tert*-Butyl-(2-(2*R*,3*R*,5*R*)-3-(*tert*-butyldimethylsilyloxy)-5-vinyltetrahydrofuran-2-yl)ethoxydimethylsilane (**7a**):**

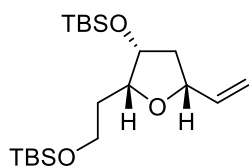

The titled compound was prepared from **8a** (89.7 mg, 0.2 mmol) by similar procedure as described for **8b** to give **7a** (71.2 mg, 92%, *trans*:*cis* = 1:9) as colorless oil.  $[\alpha]_D^{25} -2.4$  (*c* 1.0, CHCl<sub>3</sub>). IR (CHCl<sub>3</sub>):  $\nu_{\max} = 2955, 2929, 2894, 2857, 1472, 1463, 1388, 1362, 1255, 1158, 1088, 1006, 937, 922, 836, 812, 775, 735, 666 \text{ cm}^{-1}$ . <sup>1</sup>H NMR, (500 MHz, CDCl<sub>3</sub>):  $\delta = 5.99\text{--}5.89$  (m, 1H), 5.20–5.14 (m, 1H), 5.06–5.02 (m, 1H), 4.28–4.22 (m, 2H), 3.83 (q, *J* = 4.2 Hz, 1H), 3.75 (dd, *J* = 7.2, 5.6 Hz, 2H), 2.38–2.29 (m, 1H), 1.88–1.82 (m, 1H), 1.80–1.74 (m, 1H), 1.69–1.64 (m, 1H), 0.88 (s, 18H), 0.048 (s, 12H) ppm. <sup>13</sup>C{<sup>1</sup>H} NMR (125 MHz, CDCl<sub>3</sub>):  $\delta = 140.2, 115.2, 79.9, 78.8, 73.5, 60.6, 42.3, 33.2, 25.9, 25.8, 18.3, 18.0, -4.6, -5.1, -5.3$  ppm. HRMS (ESI-TOF) *m/z*: [M + Na]<sup>+</sup> Calcd for C<sub>20</sub>H<sub>42</sub>O<sub>3</sub>Si<sub>2</sub>Na 409.2565; Found 409.2570.

**Synthesis of esters **22a** and **22b**:** To ascertain the stereochemical outcome of the Tsuji–Trost cyclization, we converted the cyclized products **7a** and **7b** to the esters by desilylation and then treatment with *p*-nitrobenzoyl chloride to provide crystalline diesters **22a** and **22b**, respectively (Scheme S2). The structures of these were unambiguously confirmed by X-ray analysis.

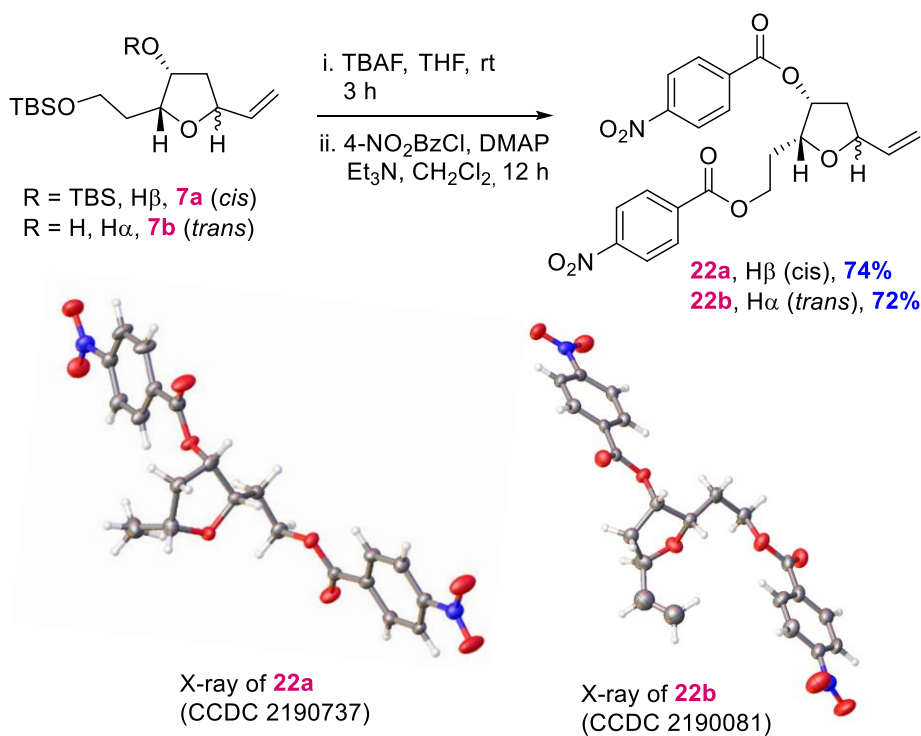

**Scheme S2** Stereochemistry confirmation based on crystal structures of **22a** and **22b**.



**2-((2*S*,3*R*,5*R*)-3-(4-Nitrobenzoyloxy)-5-vinyltetrahydrofuran-2-yl)ethyl 4-nitrobenzoate **22b**):**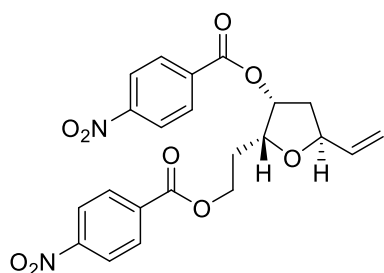

To a stirred solution of **7b** (0.2 g, 0.734 mmol) in anhydrous THF (3 mL) was added 1M TBAF (0.74 mL, 0.734 mmol, 1.0 equiv) solution at 0 °C. The reaction mixture was then stirred at rt for 3 h. The solution was diluted with EtOAc (10 mL) and the separated organic layer was washed with brine, dried (Na<sub>2</sub>SO<sub>4</sub>) and concentrated. The crude product (0.115 g) was then dissolved in anhydrous CH<sub>2</sub>Cl<sub>2</sub> (5 mL) followed by sequential addition of Et<sub>3</sub>N (0.26 mL, 1.84 mmol, 2.5 equiv), 4-dimethylaminopyridine (9 mg, 0.0734 mmol, 0.1 equiv) and 4-nitrobenzoylchloride (0.273 g, 1.47 mmol, 2.0 equiv) at 0 °C. The mixture was then stirred at room temperature for 12 h. It was quenched with cold-water (10 mL) and extracted with CH<sub>2</sub>Cl<sub>2</sub> (3 × 20 mL). The combined organic layers were washed with water, brine, dried (Na<sub>2</sub>SO<sub>4</sub>) and concentrated. The residue was purified by silica gel column chromatography using petroleum ether/EtOAc (7:3) as eluent to give **22b** (0.241 g, 72%) as white solid. M.P. 245–246 °C. [α]<sub>D</sub><sup>25</sup> –13.8 (*c* 1.0, CHCl<sub>3</sub>). IR (CHCl<sub>3</sub>): ν<sub>max</sub> = 2932, 1725, 1529, 1349, 1274, 1104, 719 cm<sup>-1</sup>. <sup>1</sup>H NMR, (500 MHz, CDCl<sub>3</sub>): δ = 8.31 (d, *J* = 8.9 Hz, 2H), 8.25 (d, *J* = 8.8 Hz, 2H), 8.21 (d, *J* = 8.8 Hz, 2H), 8.16 (d, *J* = 8.7 Hz, 2H), 5.91–5.84 (m, 1H), 5.68 (t, *J* = 4.0 Hz, 1H), 5.31 (d, *J* = 17.3 Hz, 1H), 5.17 (d, *J* = 10.5 Hz, 1H), 4.73 (dd, *J* = 15.8, 6.7 Hz, 1H), 4.62–4.57 (m, 1H), 4.53–4.48 (m, 1H), 4.37–4.34 (m, 1H), 2.39 (dd, *J* = 14.2, 6.5 Hz, 1H), 2.20–2.12 (m, 3H) ppm. <sup>13</sup>C{<sup>1</sup>H} NMR (125 MHz, CDCl<sub>3</sub>): δ = 164.5, 163.9, 150.8, 150.5, 137.8, 135.4, 135.0, 130.8, 130.7, 123.7, 123.5, 116.3, 78.4, 77.9, 77.3, 63.2, 39.5, 29.1 ppm. HRMS (ESI-TOF) *m/z*: [M + Na]<sup>+</sup> Calcd for C<sub>22</sub>H<sub>20</sub>N<sub>2</sub>O<sub>9</sub>Na 479.1061; Found 479.1062.

**2-((2*R*,3*R*,5*R*)-3-(4-Nitrobenzoyloxy)-5-vinyltetrahydrofuran-2-yl)ethyl 4-nitrobenzoate **22a**):**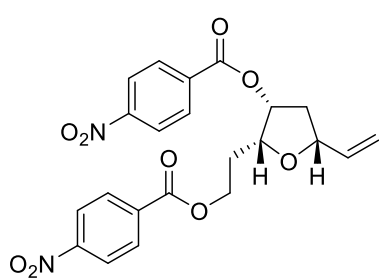

The titled compound was prepared from **7a** (0.1 g, 0.258 mmol) by a similar procedure as described for **22b** to give **22a** (87.3 mg, 74%) as white solid. M.P. 215–216 °C; [α]<sub>D</sub><sup>25</sup> –0.6 (*c* 1.0, CHCl<sub>3</sub>). IR (CHCl<sub>3</sub>): ν<sub>max</sub> = 2932, 1726, 1603, 1530, 1348, 1281, 1120, 1105, 1015, 907, 720 cm<sup>-1</sup>. <sup>1</sup>H NMR, (500 MHz, CDCl<sub>3</sub>): δ = 8.30 (d, *J* = 8.9 Hz, 2H), 8.26 (d, *J* = 8.8 Hz, 2H), 8.20–8.15 (m, 4H), 5.97–5.90 (m, 1H), 5.62–5.60 (m, 1H), 5.33 (d, *J* = 17.3 Hz, 1H), 5.18 (d, *J* = 10.4 Hz, 1H), 4.63–4.58 (m, 1H), 4.54–4.49 (m, 1H), 4.45 (dd, *J* = 13.8, 6.2 Hz, 1H), 4.15–4.12 (m, 1H), 2.75–2.69 (m, 1H), 2.22–2.17 (m, 2H), 1.93 (dd, *J* = 14.4, 2.2 Hz, 1H) ppm. <sup>13</sup>C{<sup>1</sup>H} NMR (125 MHz, CDCl<sub>3</sub>): δ = 164.5, 164.0, 150.7, 150.6, 138.2, 135.4, 135.0, 130.7, 130.7, 123.7, 123.5, 116.5, 78.6, 78.6, 76.8, 63.2, 39.5, 28.8 ppm. HRMS (ESI-TOF) *m/z*: [M + Na]<sup>+</sup> Calcd for C<sub>22</sub>H<sub>20</sub>N<sub>2</sub>O<sub>9</sub>Na 479.1061; Found 479.1058.

## Plausible Paths for Diastereoselectivity

Based on experimental results and literature,<sup>3</sup> it is evident that the *cis*-stereochemistry is favored in keeping the  $\pi$ -allyl-Pd moiety (in pseudo-equatorial site) away from the  $\beta$ -OTBS group, which is non-coordinating as in model **A** giving predominantly the 1,5-*cis*-THF unit (**8a**→**7a**) (Scheme S3). For the *trans*-ring closure as in model **B**, when the  $\beta$ -OH is free, the acetate co-ordination allows *trans*-ring closure (**8b**→**7b**). Thus, the  $\beta$ -*O*-silyl group leads predominantly to 1,5-*cis*-THF scaffold.

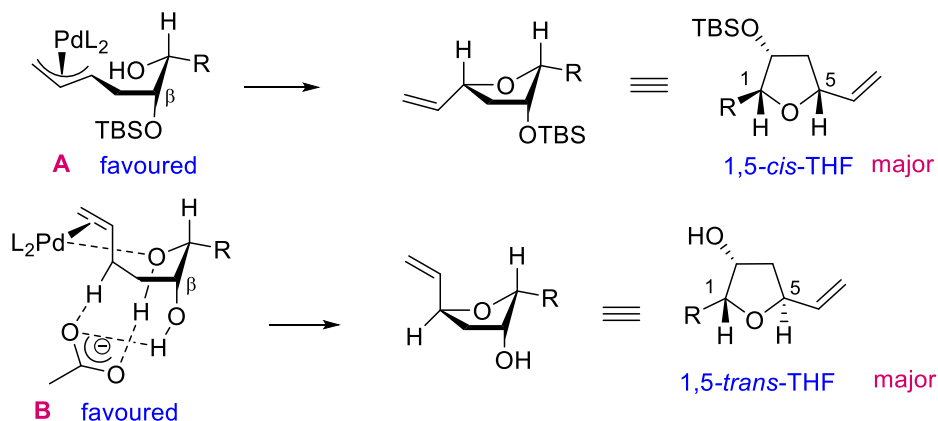

**Scheme S3** Plausible models for diastereoselectivity.

**(S)-1-((2R,4R,5R)-4-(tert-Butyldimethylsilyloxy)-5-(2-tert-butylidimethylsilyloxyethyl) tetrahydrofuran-2-yl)prop-2-yn-1-ol (12a) and (R)-1-((2R,4R,5R)-4-(tert-Butyldimethylsilyloxy)-5-(2-tert-butylidimethylsilyloxyethyl) tetrahydrofuran-2-yl)prop-2-yn-1-ol (12b):**

Ozone ( $O_3$ ) was bubbled through a stirred solution of **7a** (2.1 g, 5.44 mmol) in  $CH_2Cl_2$  (30 mL) at  $-78$  °C for 10 min. Then dimethylsulfide (1.61 mL, 21.76 mmol, 4.0 equiv) was added and the mixture stirred at  $-78$  °C for 2 h and room temperature for 1 h. The mixture was concentrated to give crude aldehyde (2.1 g) that was used directly for next reaction.

To the cooled solution of above aldehyde (2.1 g) at  $-20$  °C in dry THF was added ethynylmagnesium bromide solution (27.2 mL, 0.5M solution hexane, 13.6 mmol, 2.5 equiv) dropwise under inert atmosphere. The reaction mixture was maintained at  $-20$  °C for 2 h. It was then quenched with saturated aq. solution of  $NH_4Cl$  and extracted with EtOAc ( $2 \times 20$  mL). The combined organic phases were dried ( $Na_2SO_4$ ) and the solvent was removed by rotary evaporation. The resulting residue (**12a:12b** = 1.1:1 by  $^1H$  NMR) was purified by silica gel flash chromatography using petroleum ether/EtOAc (9.5:0.5) as eluent to give **12a** (1.04 g, 46%) as colorless oil. Further elution gave **12b** (0.901 g, 40%) as colorless oil.

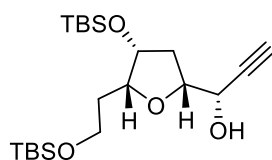

**Data for 12a:**  $[\alpha]_D^{25} +26.3$  (*c* 1.5, CHCl<sub>3</sub>). IR (CHCl<sub>3</sub>):  $\nu_{\max} = 3378, 3313, 3270, 2954, 2929, 2884, 2857, 1471, 1442, 1409, 1389, 1361, 1300, 1256, 1182, 1085, 1061, 1032, 1006, 959, 909, 865, 836, 780, 735, 663$  cm<sup>-1</sup>. <sup>1</sup>H NMR (400 MHz, CDCl<sub>3</sub>):  $\delta = 4.52$  (t, *J* = 2.5 Hz, 1H), 4.26 (dt, *J* = 9.4, 3.3 Hz, 1H), 4.21–4.18 (m, 1H), 3.91 (dt, *J* = 8.9, 3.3 Hz, 1H), 3.76 (dd, *J* = 9.6, 3.2 Hz, 2H), 2.41 (d, *J* = 2.2 Hz, 1H), 2.32 (ddd, *J* = 14.3, 9.5, 5.0 Hz, 1H), 2.18 (dd, *J* = 14.1, 2.9 Hz, 1H), 1.87 (qd, *J* = 9.6, 5.0 Hz, 1H), 1.78–1.68 (m, 1H), 0.93 (s, 9H), 0.90 (s, 9H), 0.15 (s, 3H), 0.12 (s, 3H), 0.06 (s, 6H) ppm. <sup>13</sup>C{<sup>1</sup>H} NMR (100 MHz, CDCl<sub>3</sub>):  $\delta = 82.7, 80.6, 79.9, 73.3, 72.8, 63.2, 60.4, 35.8, 32.7, 26.0, 25.95, 25.8, 25.77, 18.4, 18.1, -4.7, -5.0, -5.3$  ppm. HRMS (ESI-TOF) *m/z*: [M + H]<sup>+</sup> Calcd for C<sub>21</sub>H<sub>43</sub>O<sub>4</sub>Si<sub>2</sub> 415.2694; Found 415.2692.

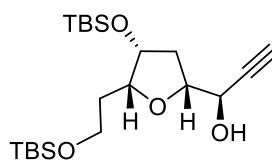

**Data for 12b:**  $[\alpha]_D^{25} +0.2$  (*c* 1.2, CHCl<sub>3</sub>). IR (CHCl<sub>3</sub>):  $\nu_{\max} = 3442, 3313, 2955, 2929, 2858, 2897, 1472, 1389, 1361, 1256, 1191, 1096, 1051, 1006, 955, 936, 836, 810, 776, 734, 665$  cm<sup>-1</sup>. <sup>1</sup>H NMR (400 MHz, CDCl<sub>3</sub>):  $\delta = 4.41$  (dd, *J* = 6.3, 2.1 Hz, 1H), 4.21 (t, *J* = 3.4 Hz, 1H), 4.13–4.07 (m, 1H), 3.97 (dt, *J* = 8.0, 3.8 Hz, 1H), 3.77 (dd, *J* = 9.2, 3.9 Hz, 2H), 2.43 (d, *J* = 2.0 Hz, 1H), 2.30 (ddd, *J* = 14.0, 9.0, 5.1 Hz, 1H), 1.94 (dd, *J* = 14.4, 2.9 Hz, 1H), 1.86 (dt, *J* = 13.9, 7.0 Hz, 1H), 1.81–1.72 (m, 1H), 0.91 (s, 9H), 0.90 (s, 9H), 0.11 (s, 3H), 0.09 (s, 3H), 0.07 (s, 6H) ppm. <sup>13</sup>C{<sup>1</sup>H} NMR (100 MHz, CDCl<sub>3</sub>):  $\delta = 82.4, 81.0, 80.5, 73.1, 72.9, 65.5, 60.5, 38.0, 33.1, 26.0, 25.95, 25.8, 25.7, 18.4, 18.0, -4.7, -5.1, -5.3$  ppm. HRMS (ESI-TOF) *m/z*: [M + H]<sup>+</sup> Calcd for C<sub>21</sub>H<sub>43</sub>O<sub>4</sub>Si<sub>2</sub> 415.2694; Found 415.2694.

### Assignment of absolute stereochemistry at propargylic alcohol center for 12a and 12b

In literature, the relative configurations of  $\alpha$ -tetrahydrofurylpropargyl alcohols and their derivatives has been assigned on the basis of Felkin–Anh selectivity and their <sup>1</sup>H-NMR vicinal coupling constants.<sup>4</sup> The smaller vicinal coupling (*J* = 2–4 Hz) was assigned to *erythro* isomer than the larger value to the corresponding *threo* isomer (*J* = 6–8 Hz). In our study, the compounds **12a** and **12b** were appropriate for exact analysis as described in literature. The smaller, *J* = 2.5 Hz coupling constant for **12a** is consistent with the assignment of **12a** as the *erythro* isomer and **12b** (*J* = 6.3, 2.1 Hz) as *threo* isomer.

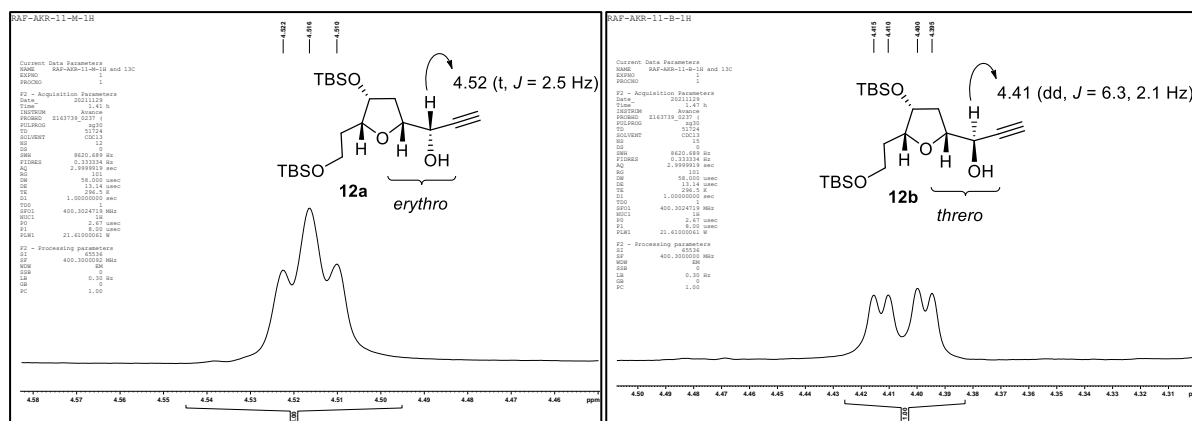

**(R)-1-((2R,4R,5R)-4-(tert-Butyldimethylsilyloxy)-5-(2-tert-butyldimethylsilyloxyethyl) tetrahydrofuran-2-yl)prop-2-yn-1-yl 2,4,6-triisopropylbenzenesulfonate (6b):**

To a stirred solution of **12b** (0.8 g, 1.93 mmol) in anhydrous  $\text{CH}_2\text{Cl}_2$  (2.0 mL) were added DMAP (1.42 g, 11.59 mmol, 6.0 equiv) and 2,4,6-triisopropylbenzenesulfonyl chloride (1.75 g, 5.79 mmol, 3.0 equiv) at 0 °C under inert atmosphere. After being stirred at room temperature for 12 h, the reaction mixture was quenched with  $\text{H}_2\text{O}$  (10 mL) and extracted with  $\text{CH}_2\text{Cl}_2$  (2 × 20 mL). The combined organic phases were dried ( $\text{Na}_2\text{SO}_4$ ) and the solvent was removed by rotary evaporation. The resulting residue was purified by silica gel flash chromatography using petroleum ether/EtOAc (50:1) as eluent to give the trisylate **6b** (0.971 g, 74%) as a colorless oil.  $[\alpha]_{\text{D}}^{25}$   $-6.7$  ( $c$  0.75,  $\text{CHCl}_3$ ). IR ( $\text{CHCl}_3$ ):  $\nu_{\text{max}}$  = 3311, 2956, 2929, 2858, 1600, 1566, 1471, 1463, 1426, 1380, 1362, 1350, 1299, 1256, 1196, 1179, 1157, 1137, 1083, 1062, 1006, 982, 928, 878, 835, 810, 776, 735, 668, 566  $\text{cm}^{-1}$ .  $^1\text{H}$  NMR (400 MHz,  $\text{CDCl}_3$ ):  $\delta$  = 7.14 (s, 2H), 5.38 (dd,  $J$  = 8.2, 2.1 Hz, 1H), 4.21–4.12 (m, 4H), 4.09–3.97 (m, 1H), 3.69–3.61 (m, 2H), 2.89 (dt,  $J$  = 13.8, 6.9 Hz, 1H), 2.29 (d,  $J$  = 2.1 Hz, 1H), 2.25 (td,  $J$  = 8.7, 4.3 Hz, 1H), 2.07 (d,  $J$  = 13.7 Hz, 1H), 1.81–1.72 (m, 1H), 1.70–1.60 (m, 1H), 1.27–1.23 (m, 18H), 0.91 (s, 9H), 0.87 (s, 9H), 0.07 (d,  $J$  = 3.7 Hz, 6H), 0.03 (s, 6H) ppm.  $^{13}\text{C}\{^1\text{H}\}$  NMR (125 MHz,  $\text{CDCl}_3$ ):  $\delta$  = 153.2, 150.5, 131.5, 123.4, 81.1, 78.4, 77.8, 76.8, 73.4, 72.6, 60.2, 38.1, 34.2, 33.6, 29.6, 26.0, 25.8, 24.7, 23.7, 23.6, 18.3, 18.0,  $-4.7$ ,  $-5.1$ ,  $-5.3$  ppm. HRMS (ESI-TOF)  $m/z$ :  $[\text{M} + \text{H}]^+$  Calcd for  $\text{C}_{36}\text{H}_{65}\text{O}_6\text{SSi}_2$  681.4035; Found 681.4031.

**((2R,3R,5R)-5-((R)-3-Bromopropa-1,2-dien-1-yl)-2-(2-tert-butyldimethylsilyloxyethyl) tetrahydrofuran-3-yloxy)tert-butyldimethylsilane (13a):**

To a stirred suspension of LiBr (1.41 g, 16.2 mmol, 10.0 equiv) in dry THF was added CuBr (2.32 g, 16.2 mmol, 10.0 equiv) at room temperature and the mixture stirred for 30 min under inert atmosphere till  $\text{LiCuBr}_2$  reagent was formed. The solution of **6b** (1.1 g, 1.62 mmol) in anhydrous THF (2 mL) was added dropwise to the above prepared  $\text{LiCuBr}_2$  solution at room temperature and then heated at 70 °C for 4 h. The mixture was cooled to room temperature and quenched

with saturated aq.  $\text{NH}_4\text{Cl}$  solution (20 mL) and extracted with EtOAc ( $2 \times 20$  mL). The combined organic phases were dried ( $\text{Na}_2\text{SO}_4$ ) and the solvent was removed by rotary evaporation. The resulting residue was purified by silica gel flash chromatography using petroleum ether/EtOAc (100:1) as eluent giving bromoallene **13a** (0.71 g, 92%) as pale yellow oil.  $[\alpha]_{\text{D}}^{25} -27.8$  ( $c$  1.0,  $\text{CHCl}_3$ ). IR ( $\text{CHCl}_3$ ):  $\nu_{\text{max}} = 2959, 2928, 2857, 1471, 1461, 1362, 1256, 1190, 1077, 939, 836, 776, 660 \text{ cm}^{-1}$ .  $^1\text{H}$  NMR (400 MHz,  $\text{CDCl}_3$ ):  $\delta = 6.01$  (dd,  $J = 5.7, 1.1$  Hz, 1H), 5.54 (dd,  $J = 7.8, 5.7$  Hz, 1H), 4.55–4.47 (m, 1H), 4.23 (ddd,  $J = 5.6, 3.7, 2.2$  Hz, 1H), 3.88 (dt,  $J = 8.3, 4.0$  Hz, 1H), 3.73 (dd,  $J = 7.2, 5.4$  Hz, 2H), 2.38 (ddd,  $J = 13.6, 8.5, 5.3$  Hz, 1H), 1.86–1.79 (m, 2H), 1.77–1.72 (m, 1H), 0.89 (s, 9H), 0.87 (s, 9H), 0.07 (s, 3H), 0.05 (s, 3H), 0.03 (s, 6H) ppm.  $^{13}\text{C}\{^1\text{H}\}$  NMR (100 MHz,  $\text{CDCl}_3$ ):  $\delta = 201.0, 103.5, 80.4, 74.7, 73.2, 72.9, 60.3, 42.2, 33.2, 25.9, 25.8, 18.3, 18.0, -4.6, -5.1, -5.3$  ppm. HRMS (ESI-TOF)  $m/z$ :  $[\text{M} + \text{Na}]^+$  Calcd for  $\text{C}_{21}\text{H}_{41}\text{BrNaO}_3\text{Si}_2$  499.1670; Found 499.1671.

### Assignment of allene stereochemistry for **13a** and **13b**

The reaction of **6b** or **6a** with bromocuprate reagent ( $\text{LiCuBr}_2$ ) follow an *anti*- $\text{S}_{\text{N}}2'$  bromination reaction giving rise to the corresponding bromoallenes **13a** or **13b**, respectively in a highly stereoselective manner. This is in accordance to literature reports.<sup>5</sup>

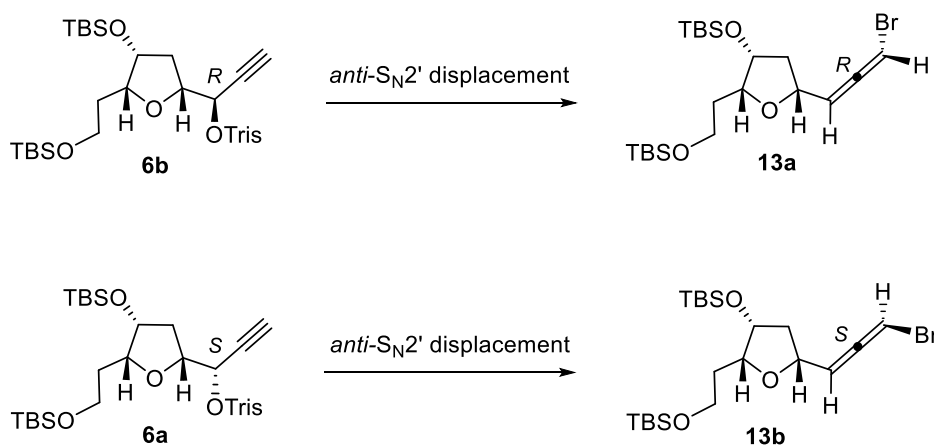

### (2*R*,3*R*,5*R*)-5-((*R*)-3-Bromopropa-1,2-dien-1-yl)-2-(2-hydroxyethyl)tetrahydrofuran-3-ol (**14a**):

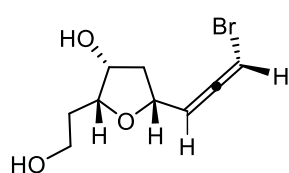

To a stirred solution of bromoallene **13a** (0.5 g, 1.05 mmol) in dry THF was added TBAF (3.16 mL, 1 M solution in THF, 3.0 equiv) at 0 °C dropwise. The mixture was stirred at room temperature for 3 h. The reaction mixture was quenched with  $\text{H}_2\text{O}$  (10 mL) and extracted with EtOAc ( $2 \times 20$  mL).

The combined organic phases were dried ( $\text{Na}_2\text{SO}_4$ ) and the solvent was removed by rotary evaporation. The resulting residue was purified by silica gel flash chromatography using petroleum ether/EtOAc (1:1) as eluent to give **14a** (0.226 g, 87%) as colorless oil.  $[\alpha]_{\text{D}}^{25} -64.3$  ( $c$  0.75,  $\text{CHCl}_3$ ). IR ( $\text{CHCl}_3$ ):  $\nu_{\text{max}}$

= 3422, 3308, 3064, 2928, 2853, 2250, 1961, 1442, 1342, 1216, 1192, 1065, 1008, 909, 735, 650  $\text{cm}^{-1}$ .  $^1\text{H}$  NMR (400 MHz,  $\text{CDCl}_3$ ):  $\delta$  = 6.03 (dd,  $J$  = 5.7, 1.1 Hz, 1H), 5.52 (dd,  $J$  = 7.0, 5.8 Hz, 1H), 4.44 (dd,  $J$  = 13.2, 7.5 Hz, 1H), 4.26 (d,  $J$  = 2.6 Hz, 1H), 3.79 (d,  $J$  = 11.9 Hz, 2H), 3.78–3.72 (m, 2H), 3.63 (dd,  $J$  = 11.1, 5.3 Hz, 1H), 2.43 (ddd,  $J$  = 14.1, 8.2, 6.1 Hz, 1H), 1.89 (dd,  $J$  = 11.7, 6.0 Hz, 2H), 1.82 (ddd,  $J$  = 13.8, 5.3, 1.7 Hz, 1H) ppm.  $^{13}\text{C}\{^1\text{H}\}$  NMR (100 MHz,  $\text{CDCl}_3$ ):  $\delta$  = 201.1, 102.3, 82.6, 74.5, 73.4, 72.2, 59.3, 40.7, 31.2 ppm. HRMS (ESI-TOF)  $m/z$ :  $[\text{M} + \text{Na}]^+$  Calcd for  $\text{C}_9\text{H}_{13}\text{BrNaO}_3$  270.9940; Found 270.9940.

**(2R,3R,5R)-5-((R)-3-Bromopropa-1,2-dien-1-yl)-2-((Z)-oct-2-en-1-yl)tetrahydrofuran-3-ol (15a):**

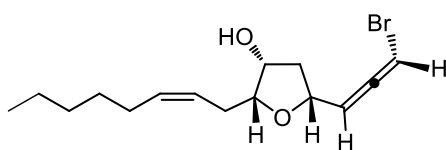

To a stirred solution of **14a** (50 mg, 0.202 mmol) in anhydrous  $\text{CH}_2\text{Cl}_2$  (2 mL) under inert atmosphere was added Dess-Martin periodinane (94.2 mg, 0.22 mmol, 1.1 equiv) in single portion at 0 °C and the mixture was stirred at room temperature for 2

h. The reaction mixture was quenched by adding a mixture (1:1) of saturated aq. solution of  $\text{NaHCO}_3$  and  $\text{Na}_2\text{S}_2\text{O}_3$  (4 mL) and the aqueous phase was separated and extracted with  $\text{CH}_2\text{Cl}_2$  ( $3 \times 10$  mL). The combined organic phases were dried ( $\text{Na}_2\text{SO}_4$ ) and the solvent was removed by rotary evaporation giving the crude aldehyde (50 mg) that was directly subjected to the Wittig olefination.

*n*-Hexyl triphenylphosphonium bromide (262 mg, 0.61 mmol, 3.0 equiv) was dissolved in anhydrous toluene under inert atmosphere. After cooling to  $-78$  °C,  $\text{NaHMDS}$  (1.0 M solution, 0.61 mL, 3.0 equiv) was added dropwise. The mixture was stirred for 30 min and then a solution of above aldehyde (50 mg) in THF (1 mL) was added dropwise. The mixture was vigorously stirred for 4 h at  $-78$  °C. The reaction was quenched with saturated aq. solution of  $\text{NH}_4\text{Cl}$  and diluted with EtOAc ( $3 \times 20$  mL). The aqueous phase was separated and then extracted with EtOAc ( $2 \times 30$  mL). The combined organic phases were dried ( $\text{Na}_2\text{SO}_4$ ) and the solvent was removed by rotary evaporation. The resulting residue was purified by silica gel flash chromatography using petroleum ether/EtOAc (9.7:0.3) as eluent to give **15a** (48.2 mg, 76%) as colorless oil.  $[\alpha]_{\text{D}}^{25}$   $-53.6$  ( $c$  0.75,  $\text{CHCl}_3$ ). IR ( $\text{CHCl}_3$ ):  $\nu_{\text{max}}$  = 3455, 3374, 2954, 2922, 2855, 1716, 1458, 1400, 1273, 1260, 1192, 1057, 969, 847, 719, 666, 660, 597, 518  $\text{cm}^{-1}$ .  $^1\text{H}$  NMR (400 MHz,  $\text{CDCl}_3$ ):  $\delta$  = 6.08 (dd,  $J$  = 5.7, 1.5 Hz, 1H), 5.60 (dd,  $J$  = 6.6, 5.7 Hz, 1H), 5.57–5.46 (m, 1H), 5.46–5.36 (m, 1H), 4.61–4.52 (m, 1H), 4.29–4.23 (m, 1H), 3.73 (td,  $J$  = 7.2, 3.2 Hz, 1H), 2.52–2.40 (m, 2H), 2.08 (dd,  $J$  = 14.2, 7.1 Hz, 1H), 1.94 (ddd,  $J$  = 14.0, 4.5, 1.5 Hz, 1H), 1.40–1.31 (m, 4H), 1.32–1.26 (m, 4H), 0.88 (t,  $J$  = 6.8 Hz, 3H) ppm.  $^{13}\text{C}\{^1\text{H}\}$  NMR (100 MHz,  $\text{CDCl}_3$ ):  $\delta$  = 201.2, 132.9, 124.4, 103.0, 83.5, 74.3, 73.7, 72.4, 41.1, 31.5, 29.7, 29.2, 27.4, 27.2, 22.5, 14.0 ppm. HRMS (ESI-TOF)  $m/z$ :  $[\text{M} + \text{Na}]^+$  Calcd for  $\text{C}_{15}\text{H}_{23}\text{BrNaO}_2$  337.0774; Found 337.0776.

### 1-*epi*-Dihydroitomanallene B (4')

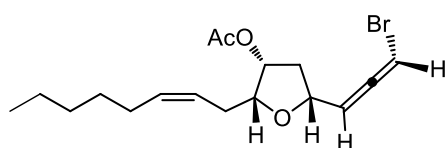

The alcohol **15a** (20 mg, 0.064 mmol) was dissolved in dry  $\text{CH}_2\text{Cl}_2$  (2 mL) under inert atmosphere and pyridine (0.1 mL, 1.28 mmol, 20.0 equiv) was added in one portion at room temperature and then the reaction was cooled to 0 °C. Under vigorous stirring, acetic anhydride (0.037 mL, 0.384 mmol, 6.0 equiv) was added dropwise. The reaction was warmed to room temperature and stirred for 12 h. After completion, it was quenched with saturated aq. solution of  $\text{NaHCO}_3$  (5 mL) and extracted with  $\text{CH}_2\text{Cl}_2$  ( $2 \times 10$  mL). The combined organic phases were dried ( $\text{Na}_2\text{SO}_4$ ) and the solvent was removed by rotary evaporation. The resulting residue was purified by silica gel flash chromatography using petroleum ether/EtOAc (9.5:0.5) as eluent to give 1-*epi*-dihydroitomanallene B **4'** (19.6 mg, 86%) as colorless oil.  $[\alpha]_{\text{D}}^{25} -25.7$  ( $c$  0.7,  $\text{CHCl}_3$ ). IR ( $\text{CHCl}_3$ ):  $\nu_{\text{max}} = 2954, 2928, 2885, 2856, 1741, 1447, 1374, 1080, 1059, 721, 712, 670, 661 \text{ cm}^{-1}$ .  $^1\text{H}$  NMR (400 MHz,  $\text{C}_6\text{D}_6$ ):  $\delta = 5.65$  (dd,  $J = 5.6, 1.6$  Hz, 1H), 5.50–5.46 (m, 2H), 5.32–5.29 (m, 1H), 5.07 (ddd,  $J = 5.8, 3.7, 1.9$  Hz, 1H), 4.16 (dt,  $J = 8.2, 6.7, 1.5$  Hz, 1H), 3.46 (td,  $J = 6.9, 3.7$  Hz, 1H), 2.60–2.50 (m, 1H), 2.47–2.42 (m, 1H), 2.01 (dt,  $J = 13.6, 6.7$  Hz, 2H), 1.91 (ddd,  $J = 14.4, 8.4, 6.0$  Hz, 1H), 1.66 (s, 3H), 1.65–1.63 (m, 1H), 1.32–1.27 (m, 2H), 1.25–1.19 (m, 4H), 0.86 (t,  $J = 6.8$  Hz, 3H) ppm.  $^{13}\text{C}\{^1\text{H}\}$  NMR (100 MHz,  $\text{C}_6\text{D}_6$ ):  $\delta = 201.4, 169.5, 132.3, 125.2, 102.9, 82.0, 74.3, 74.2, 73.8, 39.2, 31.8, 29.6, 27.8, 27.7, 22.9, 20.6, 14.2$  ppm. HRMS (ESI-TOF)  $m/z$ :  $[\text{M} + \text{Na}]^+$  Calcd for  $\text{C}_{17}\text{H}_{25}\text{BrNaO}_3$  379.0879; Found 379.0879.

### (*S*)-1-((2*R*,4*R*,5*R*)-4-(*tert*-Butyldimethylsilyloxy)-5-(2-*tert*-butyldimethylsilyloxyethyl) tetrahydrofuran-2-yl)prop-2-yn-1-yl 2,4,6-triisopropylbenzenesulfonate (**6a**):

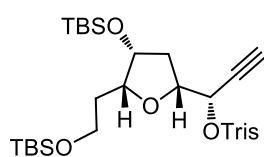

The titled compound was prepared from **12a** (1.1 g, 2.65 mmol) by a similar procedure as described for **6b** to give **6a** (1.35 g, 75%) as a colorless oil.  $[\alpha]_{\text{D}}^{25} -19.2$  ( $c$  0.5,  $\text{CHCl}_3$ ). IR ( $\text{CHCl}_3$ ):  $\nu_{\text{max}} = 3311, 2956, 2931, 2900, 2883, 2858, 2128, 1600, 1566, 1540, 1471, 1463, 1426, 1379, 1362, 1350, 1256, 1217, 1195, 1179, 1088, 1005, 950, 939, 913, 836, 813, 776, 735, 669, 650, 567 \text{ cm}^{-1}$ .  $^1\text{H}$  NMR (400 MHz,  $\text{CDCl}_3$ ):  $\delta = 7.14$  (s, 2H), 5.19 (dd,  $J = 7.2, 2.1$  Hz, 1H), 4.30–4.24 (m, 1H), 4.14 (dt,  $J = 13.5, 6.7$  Hz, 2H), 4.06 (td,  $J = 7.6, 4.9$  Hz, 1H), 3.95 (dt,  $J = 8.5, 4.2$  Hz, 1H), 3.72 (dd,  $J = 7.1, 5.7$  Hz, 2H), 2.90 (dt,  $J = 13.8, 6.9$  Hz, 1H), 2.25 (ddd,  $J = 13.5, 7.8, 5.6$  Hz, 1H), 2.13 (d,  $J = 2.1$  Hz, 1H), 2.06 (ddd,  $J = 13.6, 4.9, 2.9$  Hz, 1H), 1.88–1.70 (m, 2H), 1.28–1.22 (m, 18H), 0.91 (s, 9H), 0.87 (s, 9H), 0.12 (s, 3H), 0.07 (s, 3H), 0.03 (s, 6H) ppm.  $^{13}\text{C}\{^1\text{H}\}$  NMR (100 MHz,  $\text{CDCl}_3$ ):  $\delta = 153.6, 150.6, 131.2, 123.5, 80.6, 77.7, 77.4, 76.3, 72.5, 71.5, 60.3, 37.7, 34.2, 33.1, 29.6, 25.9, 25.8, 24.7, 24.5, 23.6, 18.3, 18.1, -4.5, -5.3, -5.4$  ppm. HRMS (ESI-TOF)  $m/z$ :  $[\text{M} + \text{Na}]^+$  Calcd for  $\text{C}_{36}\text{H}_{64}\text{NaO}_6\text{SSi}_2$  703.3854; Found 703.3851.

**((2R,3R,5R)-5-((S)-3-Bromopropa-1,2-dien-1-yl)-2-(2-tert-butyl dimethylsilyloxyethyl) tetrahydrofuran-3-yloxy)(tert-butyl)dimethylsilane (13b):**

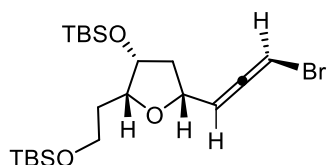

The titled compound was prepared from trisylate **6a** (0.5 g, 0.734 mmol) by a similar procedure as described for **13a** to give **13b** (0.325 g, 93%) as pale yellow oil.  $[\alpha]_D^{25} +129.6$  (*c* 0.5, CHCl<sub>3</sub>). IR (CHCl<sub>3</sub>):  $\nu_{\max} = 2956, 2931, 2883, 2858, 2252, 1471, 1388, 1361, 1256, 1218, 1192, 1088, 1005, 909, 836, 775, 735, 650$  cm<sup>-1</sup>. <sup>1</sup>H NMR (400 MHz, CDCl<sub>3</sub>):  $\delta = 5.97$  (dd, *J* = 5.7, 1.3 Hz, 1H), 5.58 (dd, *J* = 6.8, 5.9 Hz, 1H), 4.57–4.49 (m, 1H), 4.24 (dd, *J* = 6.6, 4.7 Hz, 1H), 3.89 (dt, *J* = 8.3, 4.0 Hz, 1H), 3.75 (dd, *J* = 7.1, 5.5 Hz, 2H), 2.36 (ddd, *J* = 13.5, 8.4, 5.4 Hz, 1H), 1.87–1.72 (m, 3H), 0.89 (s, 9H), 0.88 (s, 9H), 0.06 (d, *J* = 0.9 Hz, 6H), 0.05 (s, 6H) ppm. <sup>13</sup>C{<sup>1</sup>H} NMR (100 MHz, CDCl<sub>3</sub>):  $\delta = 200.8, 103.8, 80.3, 74.2, 73.2, 72.9, 60.4, 41.9, 33.2, 26.0, 25.9, 25.8, 25.7, 18.3, 18.0, -4.6, -5.1, -5.3$  ppm. HRMS (ESI-TOF) *m/z*: [M + Na]<sup>+</sup> Calcd for C<sub>21</sub>H<sub>41</sub>BrNaO<sub>3</sub>Si<sub>2</sub> 499.1670; Found 499.1674.

**((2R,3R,5R)-5-((S)-3-Bromopropa-1,2-dien-1-yl)-2-(2-hydroxyethyl) tetrahydrofuran-3-ol (14b):**

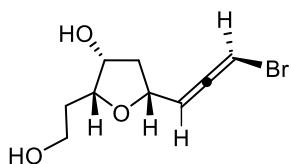

The titled compound was prepared from **13b** (300 mg, 0.63 mmol) by a similar procedure as described for **14a** to give **14b** (139 mg, 89%) as colorless oil.  $[\alpha]_D^{25} +201.6$  (*c* 0.5, CHCl<sub>3</sub>). IR (CHCl<sub>3</sub>):  $\nu_{\max} = 3403, 2949, 2931, 2251, 1961, 1473, 1442, 1342, 1216, 1192, 1061, 1008, 909, 853, 735, 650, 624$  cm<sup>-1</sup>. <sup>1</sup>H NMR (400 MHz, CDCl<sub>3</sub>):  $\delta = 6.05$  (dd, *J* = 5.7, 1.6 Hz, 1H), 5.58 (t, *J* = 6.0 Hz, 1H), 4.56–4.50 (m, 1H), 4.37–4.26 (m, 1H), 3.86 (td, *J* = 6.8, 3.5 Hz, 2H), 3.73 (d, *J* = 4.1 Hz, 1H), 3.11 (s, 2H), 2.45 (ddd, *J* = 14.1, 8.4, 6.0 Hz, 1H), 1.97 (dd, *J* = 10.9, 6.0 Hz, 2H), 1.90 (ddd, *J* = 13.8, 5.1, 1.8 Hz, 1H) ppm. <sup>13</sup>C{<sup>1</sup>H} NMR (100 MHz, CDCl<sub>3</sub>):  $\delta = 201.0, 102.9, 83.1, 74.1, 73.8, 72.6, 59.7, 40.7, 31.3$  ppm. HRMS (ESI-TOF) *m/z*: [M + Na]<sup>+</sup> Calcd for C<sub>9</sub>H<sub>13</sub>BrNaO<sub>3</sub> 270.9940; Found 270.9929.

**((2R,3R,5R)-5-((S)-3-Bromopropa-1,2-dien-1-yl)-2-(Z)-oct-2-en-1-yl) tetrahydrofuran-3-ol (15b):**

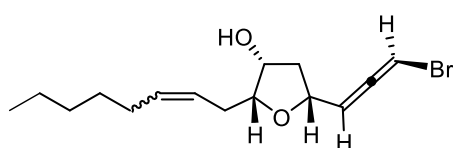

The titled compound was prepared from **14b** (60 mg, 0.242 mmol) by a similar procedure as described for **15a** to give inseparable mixture (*Z:E* = 76:24) of two isomers **15b** (59.2 mg, 78%) as colorless oil. <sup>1</sup>H NMR (400 MHz, CDCl<sub>3</sub>):  $\delta = 6.11$  (d, *J* = 2.0 Hz, 1H), 5.62 (dd, *J* = 11.2, 5.6 Hz, 1H), 5.59–5.52 (m, 1H), 5.47–5.41 (m, 1H), 4.65–4.56 (m, 1H), 4.26 (s, 1H), 3.78 (td, *J* = 7.2, 3.2 Hz, 1H), 2.58–2.41 (m, 2H), 2.14–2.04 (m, 1H), 1.98 (dd, *J* = 13.1, 3.7 Hz, 1H), 1.40–1.31 (m, 4H), 1.35–1.25 (m, 4H), 0.90 (t, *J* = 6.7 Hz, 3H) ppm. <sup>13</sup>C{<sup>1</sup>H} NMR (125 MHz, CDCl<sub>3</sub>):  $\delta = 200.8, 132.9, 124.3, 103.5, 83.6, 74.2, 73.6, 72.6, 41.0, 31.5, 29.7, 29.2, 27.4, 27.3, 22.5, 14.0$  ppm. HRMS (ESI-TOF) *m/z*: [M + Na]<sup>+</sup> Calcd for C<sub>15</sub>H<sub>23</sub>BrNaO<sub>2</sub> 337.0774; Found 337.0776.



**(+)-Dihydroitomanallene B (4) and 9E-(+)-dihydroitomanalleneB (4'')**

The titled compounds were prepared from **15b** (20 mg, 0.064 mmol) by a similar procedure as described for **4'** to give easily separable two isomers, (+)-dihydroitomanallene B **4** (15 mg, 66%) and 9E-(+)-dihydroitomanallene B **4''** (4.8 mg, 21%) as colorless oils.

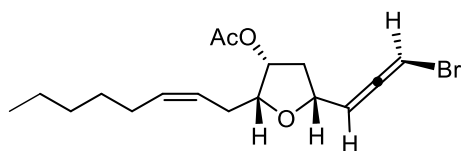

Data for **4**:  $[\alpha]_D^{25} +73.6$  (*c* 0.25, CHCl<sub>3</sub>). lit.<sup>6</sup>  $[\alpha]_D^{25} +64.01$  (*c* 0.39, CHCl<sub>3</sub>). IR (CHCl<sub>3</sub>)  $\nu_{\max} = 2954, 2925, 2855, 1962, 1740, 1456, 1440, 1374, 1120, 1078, 1057, 966, 898, 845, 661, 605, 572$  cm<sup>-1</sup>. <sup>1</sup>H NMR (500 MHz, C<sub>6</sub>D<sub>6</sub>):  $\delta = 5.68$  (dd, *J* = 5.7, 1.8 Hz, 1H), 5.53–5.46 (m, 2H), 5.24 (t, *J* = 5.7 Hz, 1H), 5.07 (dd, *J* = 6.7, 2.9 Hz, 1H), 4.12–4.07 (m, 1H), 3.48 (td, *J* = 6.8, 3.8 Hz, 1H), 2.60–2.52 (m, 1H), 2.48 (dd, *J* = 13.6, 7.1 Hz, 1H), 2.07–2.00 (m, 2H), 1.91 (ddd, *J* = 14.4, 8.4, 6.1 Hz, 1H), 1.68 (s, 3H), 1.65–1.61 (m, 1H), 1.35–1.28 (m, 2H), 1.26–1.21 (m, 4H), 0.87 (t, *J* = 6.8 Hz, 3H) ppm. <sup>13</sup>C{<sup>1</sup>H} NMR (125 MHz, C<sub>6</sub>D<sub>6</sub>):  $\delta = 201.5, 169.7, 132.4, 125.3, 103.1, 82.1, 74.3, 74.0, 73.9, 39.3, 31.8, 29.7, 27.9, 27.8, 23.0, 20.6, 14.3$  ppm. HRMS (ESI-TOF) *m/z*: [M + Na]<sup>+</sup> Calcd for C<sub>17</sub>H<sub>25</sub>BrNaO<sub>3</sub> 379.0879; Found 379.0874.

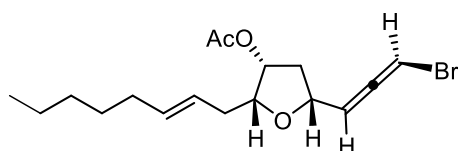

Data for **4''**:  $[\alpha]_D^{25} +32.7$  (*c* 0.3, CHCl<sub>3</sub>). IR (CHCl<sub>3</sub>):  $\nu_{\max} = 2959, 2929, 2893, 2885, 2857, 2336, 1740, 1464, 1394, 1378, 1081, 966, 822, 665, 603, 571$  cm<sup>-1</sup>. <sup>1</sup>H NMR (400 MHz, C<sub>6</sub>D<sub>6</sub>):  $\delta = 5.70$  (dd, *J* = 5.7, 2.1 Hz, 1H), 5.55–5.50 (m, 2H), 5.15 (t, *J* = 5.5 Hz, 1H), 4.91 (dt, *J* = 7.1, 3.0 Hz, 1H), 4.40–4.35 (m, 1H), 4.15–4.13 (m 1H), 2.32 (t, *J* = 5.8 Hz, 1H), 2.02 (ddd, *J* = 11.4, 7.4, 4.0 Hz, 3H), 1.62 (s, 3H), 1.29–1.21 (m, 8H), 0.88 (t, *J* = 6.8 Hz, 3H) ppm. <sup>13</sup>C{<sup>1</sup>H} NMR (125 MHz, C<sub>6</sub>D<sub>6</sub>):  $\delta = 201.3, 169.9, 133.0, 124.6, 103.1, 84.0, 77.7, 77.66, 74.5, 74.3, 37.5, 31.8, 31.4, 29.7, 27.8, 23.0, 20.7, 14.3$  ppm. HRMS (ESI-TOF) *m/z*: [M + Na]<sup>+</sup> Calcd for C<sub>17</sub>H<sub>25</sub>BrNaO<sub>3</sub> 379.0879; Found 379.0881.

**(S)-1-((2R,4R,5R)-4-(tert-Butyldimethylsilyloxy)-5-(2-tertbutyldimethylsilyloxyethyl)tetrahydrofuran-2-yl)but-3-en-1-ol (16):**

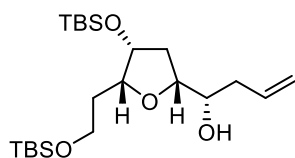

Ozone (O<sub>3</sub>) was bubbled through a stirred solution of **7a** (200 mg, 0.517 mmol) in CH<sub>2</sub>Cl<sub>2</sub> (30 mL) –78 °C for 10 min. Then dimethylsulfide (0.15 mL, 2.06 mmol, 4.0 equiv) was added and the mixture stirred at –78 °C for 2 h and then room temperature for 1 h. The mixture was concentrated to give crude aldehyde (200 mg) that was used directly for next reaction.

To the stirred solution of above aldehyde (200 mg) in anhydrous THF (5 mL) was added a solution of allyl magnesium chloride (2.0 M in THF, 0.65 mL, 1.294 mmol, 2.5 equiv). After stirring for 2 h at –78 °C, the reaction mixture was quenched with saturated aq. NH<sub>4</sub>Cl solution (5 mL). The organic layer was separated and the aqueous layer was extracted with EtOAc (3 × 10 mL). The combined organic layers were washed with brine, dried (Na<sub>2</sub>SO<sub>4</sub>) and concentrated. The residue was purified by silica gel

column chromatography using petroleum ether/EtOAc (9:1) as eluent to give alcohol **16** (122.5 mg, 55%) as colorless oil.  $[\alpha]_{\text{D}}^{25} +2.9$  ( $c$  1.0,  $\text{CHCl}_3$ ). IR ( $\text{CHCl}_3$ ):  $\nu_{\text{max}} = 3460, 3019, 3004, 2929, 2856, 1646, 1466, 1371, 1255, 1076, 1049, 836, 668, 541, 477, 460 \text{ cm}^{-1}$ .  $^1\text{H}$  NMR (500 MHz,  $\text{CDCl}_3$ ):  $\delta = 5.91\text{--}5.79$  (m, 1H), 5.11–5.04 (m, 2H), 4.18–4.17 (m, 1H), 3.95–3.92 (m, 1H), 3.86–3.82 (m, 1H), 3.77–3.72 (m, 3H), 2.52 (brs, 1H), 2.30–2.06 (m, 3H), 1.93–1.69 (m, 3H), 0.89 (s, 9H), 0.88 (s, 9H), 0.09 (s, 6H), 0.07 (s, 6H) ppm.  $^{13}\text{C}\{^1\text{H}\}$  NMR (100 MHz,  $\text{CDCl}_3$ ):  $\delta = 134.7, 117.0, 79.8, 79.6, 73.1, 71.2, 60.5, 38.3, 34.7, 32.7, 25.9, 25.8, 18.3, 18.1, -4.7, -5.1, -5.4$  ppm. HRMS (ESI-TOF)  $m/z$ :  $[\text{M} + \text{K}]^+$  Calcd for  $\text{C}_{22}\text{H}_{46}\text{O}_4\text{Si}_2\text{K}$  469.2566; Found 469.2559.

**(*S,E*)-1-((2*R,4R,5R*)-4-(*tert*-butyldimethylsilyloxy)-5-(2-*tert*-butyldimethylsilyloxyethyl)tetrahydrofuran-2-yl)hex-3-en-1-ol (**17**):**

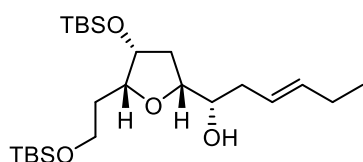

To a solution of alcohol **16** (100 mg, 0.232 mmol) in  $\text{CH}_2\text{Cl}_2$  (5 mL) was added *trans*-3-hexene (0.431 g, 2.32 mmol, 10.0 equiv) followed by Grubb's-II catalyst (5.0 mg, 0.0059 mmol, 2.5 mol%). The reaction was stirred at room temperature for 12 h and the solvent was removed under reduced pressure. Silica gel column chromatography of the crude product using petroleum ether/EtOAc (9:1) as eluent gave the alcohol **17** (101 mg, 95%) as colorless oil.  $[\alpha]_{\text{D}}^{25} +3.1$  ( $c$  1.0,  $\text{CHCl}_3$ ). IR ( $\text{CHCl}_3$ ):  $\nu_{\text{max}} = 3431, 3018, 2952, 2929, 2856, 1645, 1470, 1363, 1256, 1084, 923, 837, 830, 810, 668 \text{ cm}^{-1}$ .  $^1\text{H}$  NMR (400 MHz,  $\text{CDCl}_3$ ):  $\delta = 5.58\text{--}5.45$  (m, 1H), 5.45–5.32 (m, 1H), 4.21–4.14 (m, 1H), 3.99–3.87 (m, 1H), 3.84–3.69 (m, 4H), 2.24–2.14 (m, 1H), 2.13–1.96 (m, 4H), 1.94–1.66 (m, 3H), 0.95 (t,  $J = 7.4$  Hz, 3H), 0.89 (s, 9H), 0.88 (s, 9H), 0.10–0.03 (m, 12H) ppm.  $^{13}\text{C}\{^1\text{H}\}$  NMR (100 MHz,  $\text{CDCl}_3$ ):  $\delta = 134.9, 124.7, 79.8, 79.6, 73.1, 71.7, 60.6, 37.0, 34.7, 32.7, 25.9, 25.8, 18.3, 18.1, 13.7, -4.7, -5.1, -5.3$  ppm. HRMS (ESI-TOF)  $m/z$ :  $[\text{M} + \text{Na}]^+$  Calcd for  $\text{C}_{24}\text{H}_{50}\text{O}_4\text{Si}_2\text{Na}$  481.3140; Found 481.3136.

**(2*R,3R,5R*)-5-((*R,E*)-1-Bromohex-3-en-1-yl)-2-(2-hydroxyethyl)tetrahydrofuran-3-ol (**11**):<sup>5</sup>**

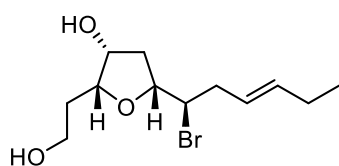

To a solution of **17** (0.15 g, 0.327 mmol) in benzene (10 mL) was added  $\text{Ph}_3\text{P}$  (0.343 g, 1.31 mmol, 4.0 equiv), 2,6-di-*tert*-butylpyridine (0.251 g, 1.31 mmol, 4.0 equiv) and a solution of  $\text{CBr}_4$  (0.434 g, 1.31 mmol, 4.0 equiv) in  $\text{CH}_2\text{Cl}_2$  (5 mL) at 0 °C and the mixture then heated to 40 °C for 20 min. The reaction mixture was cooled to room temperature and diluted with petroleum ether/EtOAc (9:1) and the solution passed through a pad of silica gel. The filtrate was concentrated to afford bromo intermediate (172 mg) as colorless oil. This was used immediately for next step.

To a stirred solution of above bromo intermediate (172 mg) in THF (5 mL) was added 2 M solution of TBAF (0.33 mL, 2 M solution in THF, 0.654 mmol, 2.0 equiv) at 0 °C and the mixture stirred for 3 h at room temperature. The reaction mixture was quenched by few drops of  $\text{Et}_3\text{N}$  and the solvent

evaporated under reduced pressure. Silica gel column chromatography of the crude product using petroleum ether/EtOAc (1 :1) as eluent gave **11** (39.3 mg, 41%) as colorless syrup.  $[\alpha]_D^{25} -5.3$  ( $c$  0.25,  $\text{CHCl}_3$ ). lit.<sup>7</sup>  $[\alpha]_D^{25} -5.6$  ( $c$  0.2,  $\text{CHCl}_3$ ). IR ( $\text{CHCl}_3$ ):  $\nu_{\text{max}} = 3646, 3393, 2929, 2864, 1679, 1458, 1264, 1107, 810, 715 \text{ cm}^{-1}$ .  $^1\text{H NMR}$  (400 MHz,  $\text{CDCl}_3$ ):  $\delta = 5.60$  (dt,  $J = 15.2, 6.4 \text{ Hz}$ , 1H),  $5.45$  (dt,  $J = 15.2, 7.0 \text{ Hz}$ , 1H),  $4.27\text{--}4.25$  (m, 1H),  $4.08\text{--}3.98$  (m, 2H),  $3.91\text{--}3.76$  (m, 3H),  $2.71\text{--}2.59$  (m, 2H),  $2.40$  (ddd,  $J = 15.0, 8.4, 6.4 \text{ Hz}$ , 1H),  $2.08\text{--}1.94$  (m, 4H),  $1.86$  (ddd,  $J = 14.4, 6.0, 1.6 \text{ Hz}$ , 1H),  $0.98$  (t,  $J = 7.5 \text{ Hz}$ , 3H) ppm.  $^{13}\text{C}\{^1\text{H}\}$  NMR (100 MHz,  $\text{CDCl}_3$ ):  $\delta = 136.0, 124.8, 82.9, 79.2, 72.7, 60.4, 59.3, 39.0, 38.7, 30.9, 25.5, 13.6$  ppm. HRMS (ESI-TOF)  $m/z$ :  $[\text{M} + \text{H}]^+$  Calcd for  $\text{C}_{12}\text{H}_{22}\text{BrO}_3$  293.0747; Found 293.0746.

#### X-ray Data for compound 22a

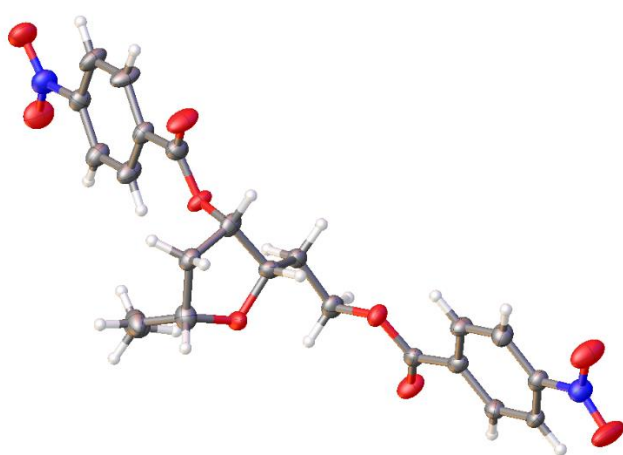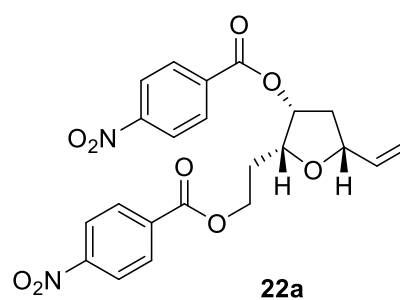

Compound 22a

**Table S1 Crystal data and structure refinement for 22a**

|                                             |                                                               |
|---------------------------------------------|---------------------------------------------------------------|
| CCDC No                                     | 2190737                                                       |
| Identification code                         | RAF-RAM-061_Mo                                                |
| Empirical formula                           | C <sub>22</sub> H <sub>21</sub> N <sub>2</sub> O <sub>9</sub> |
| Formula weight                              | 457.41                                                        |
| Temperature/K                               | 150                                                           |
| Crystal system                              | monoclinic                                                    |
| Space group                                 | P2 <sub>1</sub> /n                                            |
| a/Å                                         | 7.0311(7)                                                     |
| b/Å                                         | 41.153(3)                                                     |
| c/Å                                         | 7.9883(11)                                                    |
| α/°                                         | 90                                                            |
| β/°                                         | 112.911(14)                                                   |
| γ/°                                         | 90                                                            |
| Volume/Å <sup>3</sup>                       | 2129.1(4)                                                     |
| Z                                           | 4                                                             |
| ρ <sub>calc</sub> /g/cm <sup>3</sup>        | 1.427                                                         |
| μ/mm <sup>-1</sup>                          | 0.112                                                         |
| F(000)                                      | 956.0                                                         |
| Crystal size/mm <sup>3</sup>                | 0.19 × 0.12 × 0.09                                            |
| Radiation                                   | MoKα (λ = 0.71073)                                            |
| 2θ range for data collection/°              | 3.958 to 49.998                                               |
| Index ranges                                | -7 ≤ h ≤ 8, -48 ≤ k ≤ 48, -9 ≤ l ≤ 9                          |
| Reflections collected                       | 8643                                                          |
| Independent reflections                     | 3679 [R <sub>int</sub> = 0.1019, R <sub>sigma</sub> = 0.1479] |
| Data/restraints/parameters                  | 3679/0/299                                                    |
| Goodness-of-fit on F <sup>2</sup>           | 1.011                                                         |
| Final R indexes [I ≥ 2σ (I)]                | R <sub>1</sub> = 0.0849, wR <sub>2</sub> = 0.2095             |
| Final R indexes [all data]                  | R <sub>1</sub> = 0.1676, wR <sub>2</sub> = 0.3167             |
| Largest diff. peak/hole / e Å <sup>-3</sup> | 0.52/-0.49                                                    |

**Table S5 Bond Lengths for 22a**

| Atom | Atom | Length/Å | Atom | Atom | Length/Å |
|------|------|----------|------|------|----------|
| O001 | C00D | 1.343(6) | C00F | C00N | 1.380(7) |
| O001 | C00Q | 1.451(6) | C00G | C00K | 1.387(7) |
| O002 | C00T | 1.440(7) | C00G | C00N | 1.383(7) |
| O002 | C00U | 1.440(6) | C00H | C00P | 1.398(7) |
| O003 | C00E | 1.338(6) | C00H | C00W | 1.408(8) |
| O003 | C00L | 1.462(6) | C00I | C00K | 1.393(7) |
| O004 | C00D | 1.201(6) | C00J | C00M | 1.388(8) |
| O005 | C00E | 1.202(7) | C00J | C00X | 1.369(7) |
| O006 | N00A | 1.224(6) | C00L | C00R | 1.523(8) |
| O007 | N00A | 1.228(6) | C00L | C00U | 1.503(7) |
| O008 | N009 | 1.226(6) | C00M | C00P | 1.382(8) |
| N009 | O00B | 1.215(6) | C00O | C00T | 1.472(8) |

|      |      |          |      |      |          |
|------|------|----------|------|------|----------|
| N009 | C00F | 1.461(7) | C00O | C00V | 1.331(8) |
| N00A | C00J | 1.472(7) | C00Q | C00S | 1.511(7) |
| C00C | C00F | 1.382(7) | C00R | C00T | 1.560(8) |
| C00C | C00I | 1.384(7) | C00S | C00U | 1.501(8) |
| C00D | C00K | 1.515(8) | C00W | C00X | 1.376(8) |
| C00E | C00H | 1.488(8) |      |      |          |

**Table S6 Bond Angles for 22a**

| Atom | Atom | Atom | Angle/°  | Atom | Atom | Atom | Angle/°  |
|------|------|------|----------|------|------|------|----------|
| C00D | O001 | C00Q | 115.5(4) | C00M | C00J | N00A | 117.5(5) |
| C00U | O002 | C00T | 111.0(4) | C00X | C00J | N00A | 119.2(5) |
| C00E | O003 | C00L | 117.6(4) | C00X | C00J | C00M | 123.2(5) |
| O008 | N009 | C00F | 118.6(5) | C00G | C00K | C00D | 122.2(5) |
| O00B | N009 | O008 | 121.8(5) | C00G | C00K | C00I | 121.0(5) |
| O00B | N009 | C00F | 119.6(5) | C00I | C00K | C00D | 116.8(5) |
| O006 | N00A | O007 | 123.5(5) | O003 | C00L | C00R | 108.4(4) |
| O006 | N00A | C00J | 118.1(5) | O003 | C00L | C00U | 107.5(4) |
| O007 | N00A | C00J | 118.4(5) | C00U | C00L | C00R | 102.9(5) |
| C00F | C00C | C00I | 117.9(5) | C00P | C00M | C00J | 117.9(5) |
| O001 | C00D | C00K | 111.1(5) | C00F | C00N | C00G | 118.6(5) |
| O004 | C00D | O001 | 124.2(5) | C00V | C00O | C00T | 125.1(6) |
| O004 | C00D | C00K | 124.6(5) | C00M | C00P | C00H | 120.5(5) |
| O003 | C00E | C00H | 111.3(5) | O001 | C00Q | C00S | 106.6(4) |
| O005 | C00E | O003 | 124.4(5) | C00L | C00R | C00T | 103.7(4) |
| O005 | C00E | C00H | 124.3(5) | C00U | C00S | C00Q | 113.9(4) |
| C00C | C00F | N009 | 118.3(5) | O002 | C00T | C00O | 111.8(5) |
| C00N | C00F | N009 | 118.6(5) | O002 | C00T | C00R | 104.9(4) |
| C00N | C00F | C00C | 123.2(5) | C00O | C00T | C00R | 114.0(5) |
| C00N | C00G | C00K | 119.5(5) | O002 | C00U | C00L | 106.9(5) |
| C00P | C00H | C00E | 118.8(5) | O002 | C00U | C00S | 108.2(4) |
| C00P | C00H | C00W | 119.5(5) | C00S | C00U | C00L | 117.6(5) |
| C00W | C00H | C00E | 121.7(5) | C00X | C00W | C00H | 120.1(5) |
| C00C | C00I | C00K | 119.9(5) | C00J | C00X | C00W | 118.8(5) |

## X-ray data for compound 22b

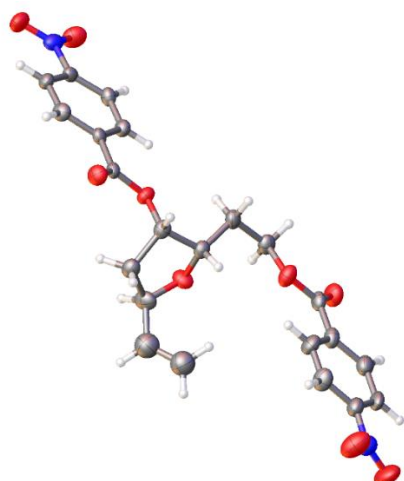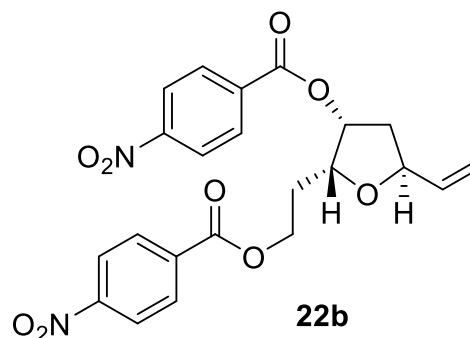

## Compound 22b

**Table S1 Crystal data and structure refinement for 22b**

|                                             |                                                                  |
|---------------------------------------------|------------------------------------------------------------------|
| <b>CCDC No</b>                              | <b>2190081</b>                                                   |
| Identification code                         | RAF-RAM-040_Mo                                                   |
| Empirical formula                           | C <sub>22</sub> H <sub>19.52</sub> N <sub>2</sub> O <sub>9</sub> |
| Formula weight                              | 455.92                                                           |
| Temperature/K                               | 150.0                                                            |
| Crystal system                              | monoclinic                                                       |
| Space group                                 | P2 <sub>1</sub>                                                  |
| a/Å                                         | 14.892(2)                                                        |
| b/Å                                         | 4.6144(5)                                                        |
| c/Å                                         | 16.629(2)                                                        |
| α/°                                         | 90                                                               |
| β/°                                         | 114.720(18)                                                      |
| γ/°                                         | 90                                                               |
| Volume/Å <sup>3</sup>                       | 1038.0(3)                                                        |
| Z                                           | 2                                                                |
| ρ <sub>calc</sub> /cm <sup>3</sup>          | 1.459                                                            |
| μ/mm <sup>-1</sup>                          | 0.115                                                            |
| F(000)                                      | 475.0                                                            |
| Crystal size/mm <sup>3</sup>                | 0.2 × 0.18 × 0.02                                                |
| Radiation                                   | MoKα (λ = 0.71073)                                               |
| 2θ range for data collection/°              | 4.81 to 49.988                                                   |
| Index ranges                                | -17 ≤ h ≤ 16, -5 ≤ k ≤ 5, -19 ≤ l ≤ 19                           |
| Reflections collected                       | 9785                                                             |
| Independent reflections                     | 3601 [R <sub>int</sub> = 0.0819, R <sub>sigma</sub> = 0.1167]    |
| Data/restraints/parameters                  | 3601/26/318                                                      |
| Goodness-of-fit on F <sup>2</sup>           | 1.009                                                            |
| Final R indexes [I >= 2σ (I)]               | R <sub>1</sub> = 0.0645, wR <sub>2</sub> = 0.1046                |
| Final R indexes [all data]                  | R <sub>1</sub> = 0.1155, wR <sub>2</sub> = 0.1347                |
| Largest diff. peak/hole / e Å <sup>-3</sup> | 0.23/-0.26                                                       |
| Flack parameter                             | -0.9(10)                                                         |

**Table S2 Bond Lengths for 22b**

| Atom | Atom | Length/Å | Atom | Atom | Length/Å  |
|------|------|----------|------|------|-----------|
| O001 | C00B | 1.354(7) | N00E | C00U | 1.482(9)  |
| O001 | C00S | 1.455(7) | C00H | C00J | 1.522(8)  |
| O002 | C00B | 1.207(7) | C00H | C00K | 1.504(8)  |
| O003 | C00K | 1.431(7) | C00I | C00N | 1.493(9)  |
| O003 | C00V | 1.460(7) | C00K | C00S | 1.524(8)  |
| O004 | C00I | 1.342(7) | C00L | C00N | 1.383(9)  |
| O004 | C00J | 1.457(7) | C00L | C00R | 1.379(9)  |
| O005 | N008 | 1.235(6) | C00M | C00P | 1.370(8)  |
| O006 | C00I | 1.202(7) | C00N | C00Q | 1.388(8)  |
| O007 | N008 | 1.227(7) | C00O | C00Q | 1.378(9)  |
| N008 | C00D | 1.481(8) | C00O | C00U | 1.376(9)  |
| O009 | N00E | 1.217(7) | C00R | C00U | 1.363(9)  |
| C00A | C00D | 1.375(8) | C00S | C00T | 1.531(8)  |
| C00A | C00F | 1.394(8) | C00T | C00V | 1.539(8)  |
| C00B | C00C | 1.490(8) | C00V | C00W | 1.547(19) |
| C00C | C00F | 1.401(8) | C00V | C1   | 1.414(18) |
| C00C | C00P | 1.401(8) | C00W | C00X | 1.419(19) |
| C00D | C00M | 1.378(8) | C1   | C00Y | 1.25(4)   |
| N00E | O00G | 1.240(8) |      |      |           |

**Table S3 Bond Angles for 22b**

| Atom | Atom | Atom | Angle/°  | Atom | Atom | Atom | Angle/°   |
|------|------|------|----------|------|------|------|-----------|
| C00B | O001 | C00S | 115.9(4) | O003 | C00K | C00S | 104.1(5)  |
| C00K | O003 | C00V | 107.9(5) | C00H | C00K | C00S | 117.9(5)  |
| C00I | O004 | C00J | 116.1(5) | C00R | C00L | C00N | 120.6(7)  |
| O005 | N008 | C00D | 118.1(5) | C00P | C00M | C00D | 118.6(6)  |
| O007 | N008 | O005 | 124.5(6) | C00L | C00N | C00I | 118.9(6)  |
| O007 | N008 | C00D | 117.4(6) | C00L | C00N | C00Q | 119.9(7)  |
| C00D | C00A | C00F | 118.1(6) | C00Q | C00N | C00I | 121.2(6)  |
| O001 | C00B | C00C | 111.5(5) | C00U | C00O | C00Q | 118.9(7)  |
| O002 | C00B | O001 | 123.6(6) | C00M | C00P | C00C | 120.3(6)  |
| O002 | C00B | C00C | 124.9(6) | C00O | C00Q | C00N | 119.7(6)  |
| C00F | C00C | C00B | 117.8(5) | C00U | C00R | C00L | 118.3(7)  |
| C00F | C00C | C00P | 119.8(6) | O001 | C00S | C00K | 106.2(5)  |
| C00P | C00C | C00B | 122.4(6) | O001 | C00S | C00T | 111.9(5)  |
| C00A | C00D | N008 | 117.7(6) | C00K | C00S | C00T | 101.9(5)  |
| C00A | C00D | C00M | 123.3(6) | C00S | C00T | C00V | 105.8(5)  |
| C00M | C00D | N008 | 119.0(6) | C00O | C00U | N00E | 117.8(6)  |
| O009 | N00E | O00G | 124.3(7) | C00R | C00U | N00E | 119.5(6)  |
| O009 | N00E | C00U | 117.7(6) | C00R | C00U | C00O | 122.6(7)  |
| O00G | N00E | C00U | 118.0(6) | O003 | C00V | C00T | 104.9(5)  |
| C00A | C00F | C00C | 119.8(6) | O003 | C00V | C00W | 101.8(8)  |
| C00K | C00H | C00J | 111.8(5) | C00T | C00V | C00W | 110.8(7)  |
| O004 | C00I | C00N | 112.0(6) | C1   | C00V | O003 | 120.2(13) |
| O006 | C00I | O004 | 123.5(6) | C1   | C00V | C00T | 117.9(9)  |
| O006 | C00I | C00N | 124.5(6) | C00X | C00W | C00V | 118.7(16) |
| O004 | C00J | C00H | 107.5(5) | C00Y | C1   | C00V | 120(3)    |
| O003 | C00K | C00H | 109.9(5) |      |      |      |           |

## References:

1. (a) H. Becker and K. B. Sharpless, *Angew. Chem. Int. Ed.* 1996, **35**, 448; (b) H. C. Kolb, M. S. VanNieuwenhze, and K. B. Sharpless, *Chem. Rev.* 1994, **94**, 2483; (c) M. Neumeyer and R. Brückner, *Eur. J. Org. Chem.* 2016, 5060.
2. J. Emsermann and T. Opatz, *Eur. J. Org. Chem.* 2017, 3362.
3. M. Arthuis, R. Beaud, V. Gandon, and E. Roulland, *Angew. Chem. Int. Ed.* 2012, **51**, 10510.
4. (a) T. A. Grese, K. D. Hutchinson, and L. E. Overman, *J. Org. Chem.* 1993, **58**, 2468; (b) K. S. Feldman, C. C. Mechem, and L. Nader, *J. Am. Chem. Soc.* 1982, **104**, 4011; (c) D. Horton and J. M. J. Tronchet, *Carbohydrate Res.* 1966, **2**, 315; (d) K. P. Kaliappan and R. S. Nandurdikar, *Org. Biomol. Chem.* 2005, **3**, 3613.
5. (a) J. Wang and L. B. Pagenkop, *Org. Lett.* 2007, **9**, 3703; (b) F. Yoshimura, T. Okada, and K. Tanino, *Org. Lett.* 2019, **21**, 559; (c) Y.-J. Jian and Y. Wu, *Synlett* 2009, 3303; (d) C. J. Elsevier, P. Vermeer, A. Gedanken, and W. Runge, *J. Org. Chem.* 1985, **50**, 364.
6. T. Kamada and C. S. Vairappan, *Molecules* 2012, **17**, 2119.
7. S. Das and C. V. Ramana, *Tetrahedron* 2015, **71**, 8577.



<sup>1</sup>H NMR(500 MHz, CDCl<sub>3</sub>) and <sup>13</sup>C{<sup>1</sup>H} NMR(125 MHz, CDCl<sub>3</sub>) of compound **18**

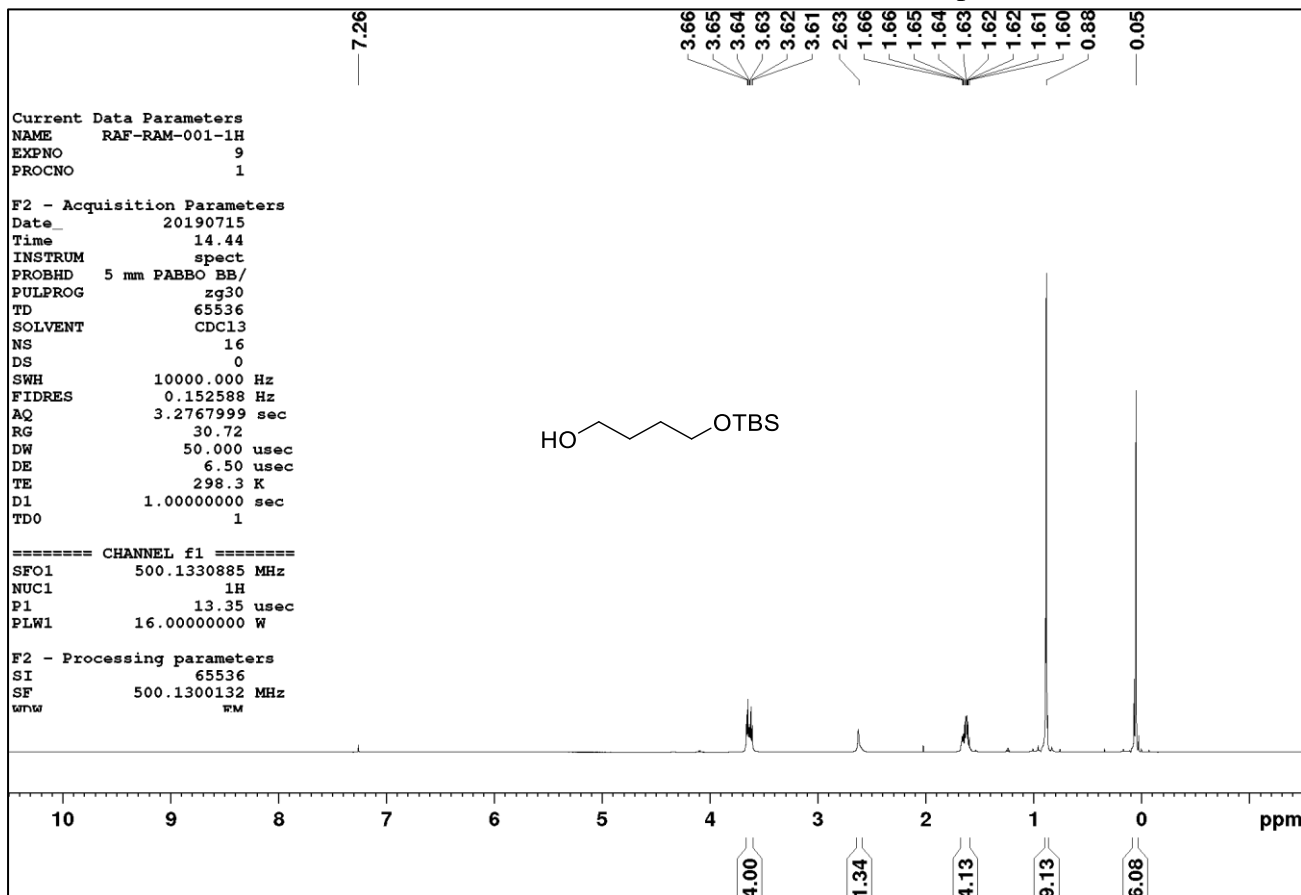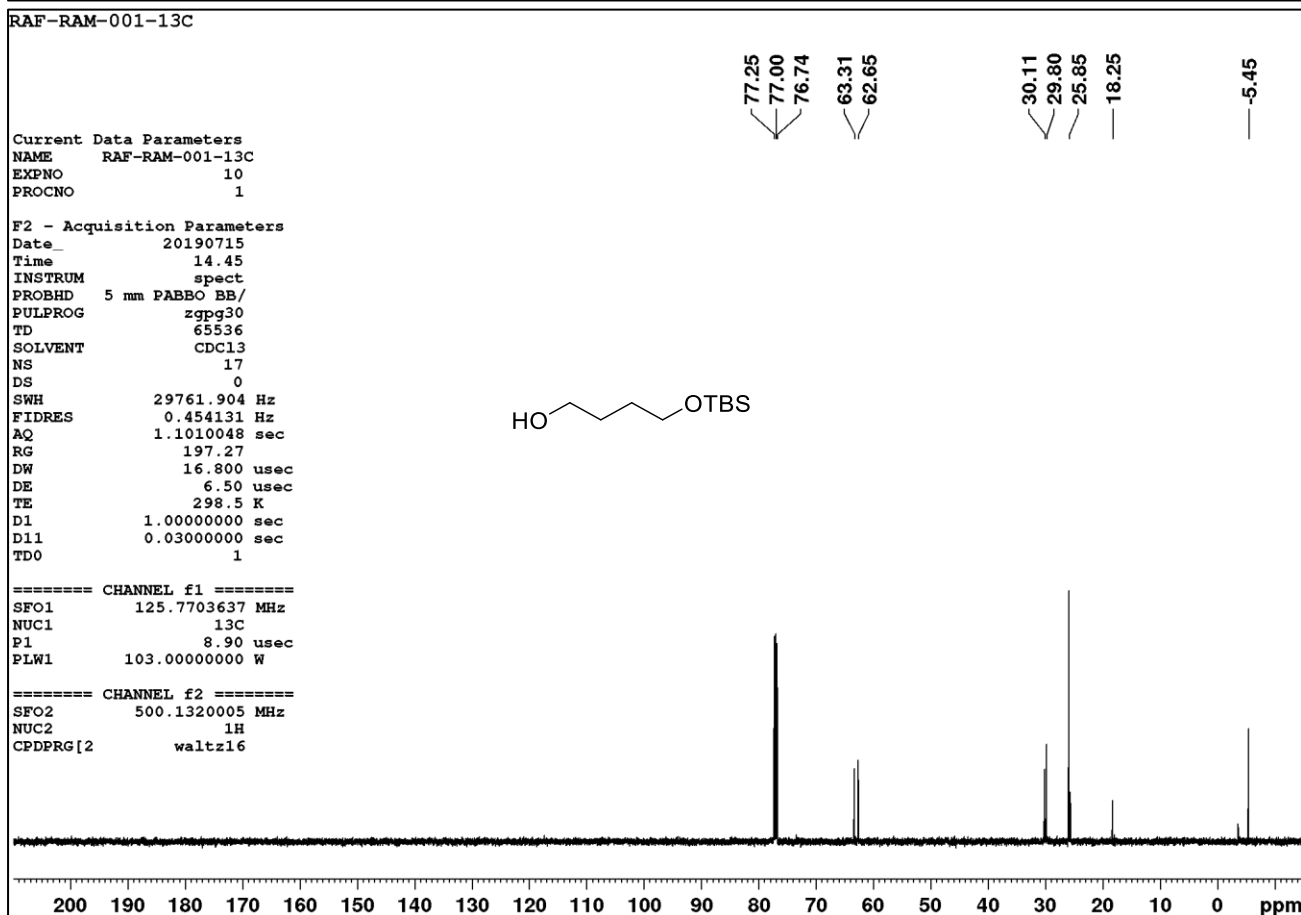

<sup>1</sup>H NMR(400 MHz, CDCl<sub>3</sub>) and <sup>13</sup>C{<sup>1</sup>H} NMR(100 MHz, CDCl<sub>3</sub>) of compound **19**

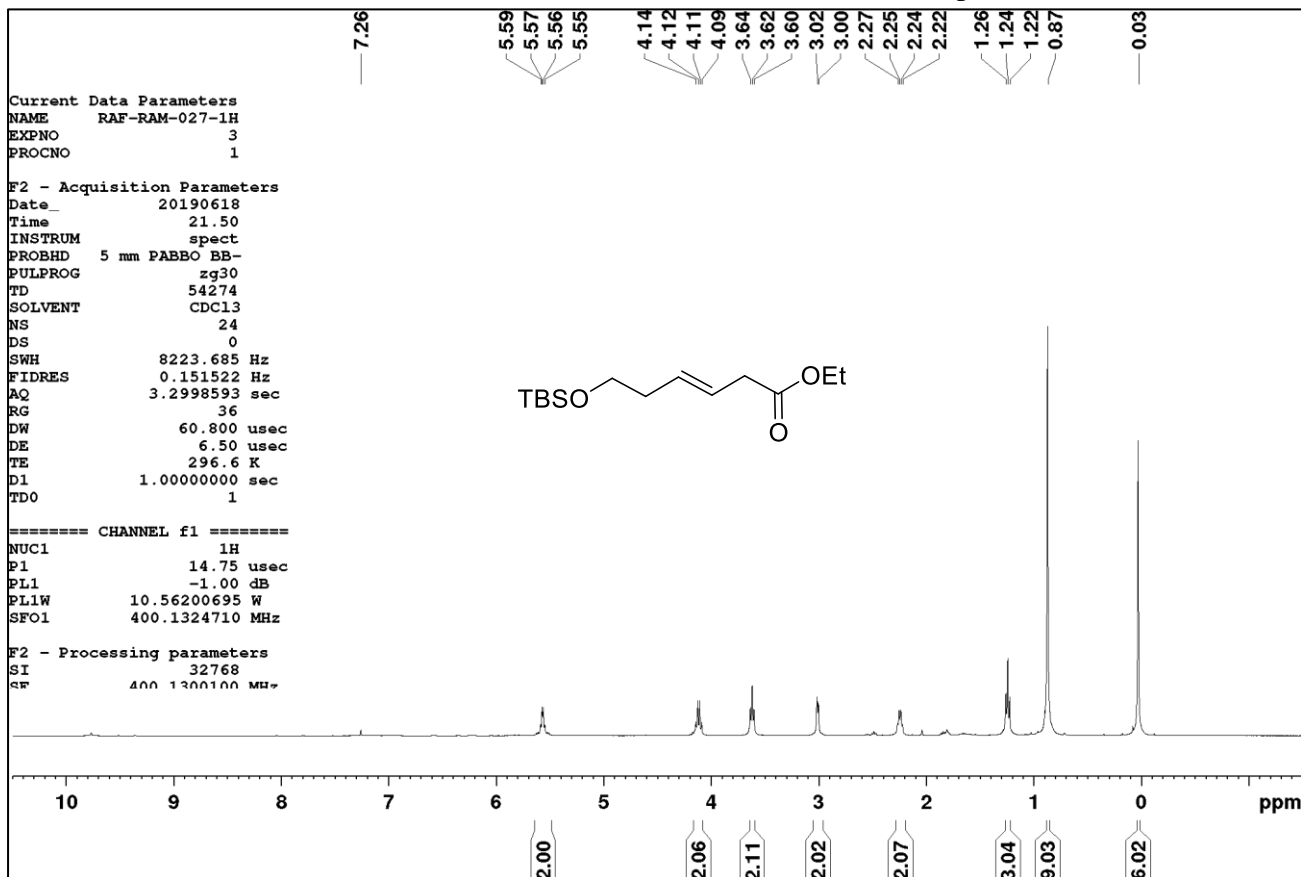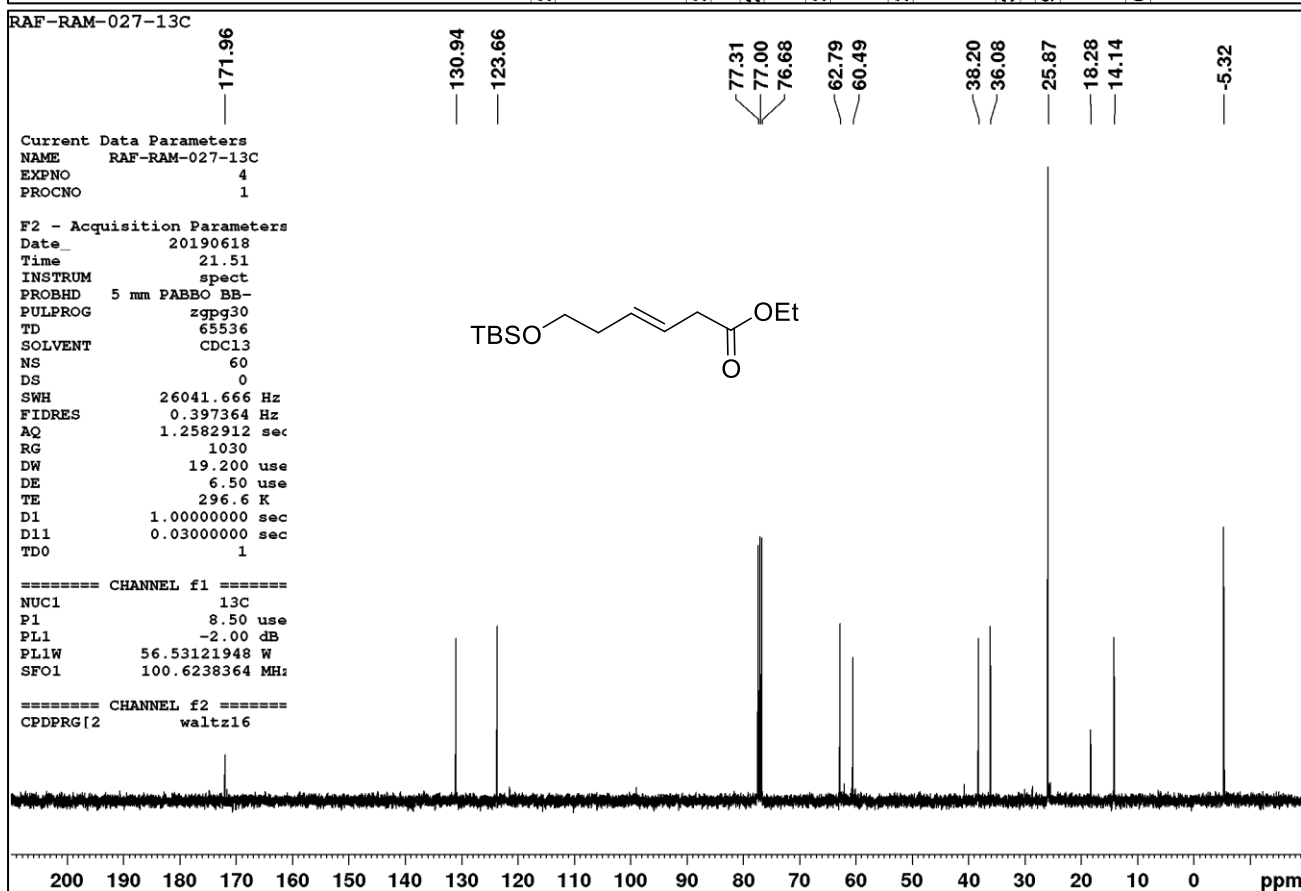

<sup>1</sup>H NMR(400 MHz, CDCl<sub>3</sub>) and <sup>13</sup>C{<sup>1</sup>H} NMR(100 MHz, CDCl<sub>3</sub>) of compound **9a**

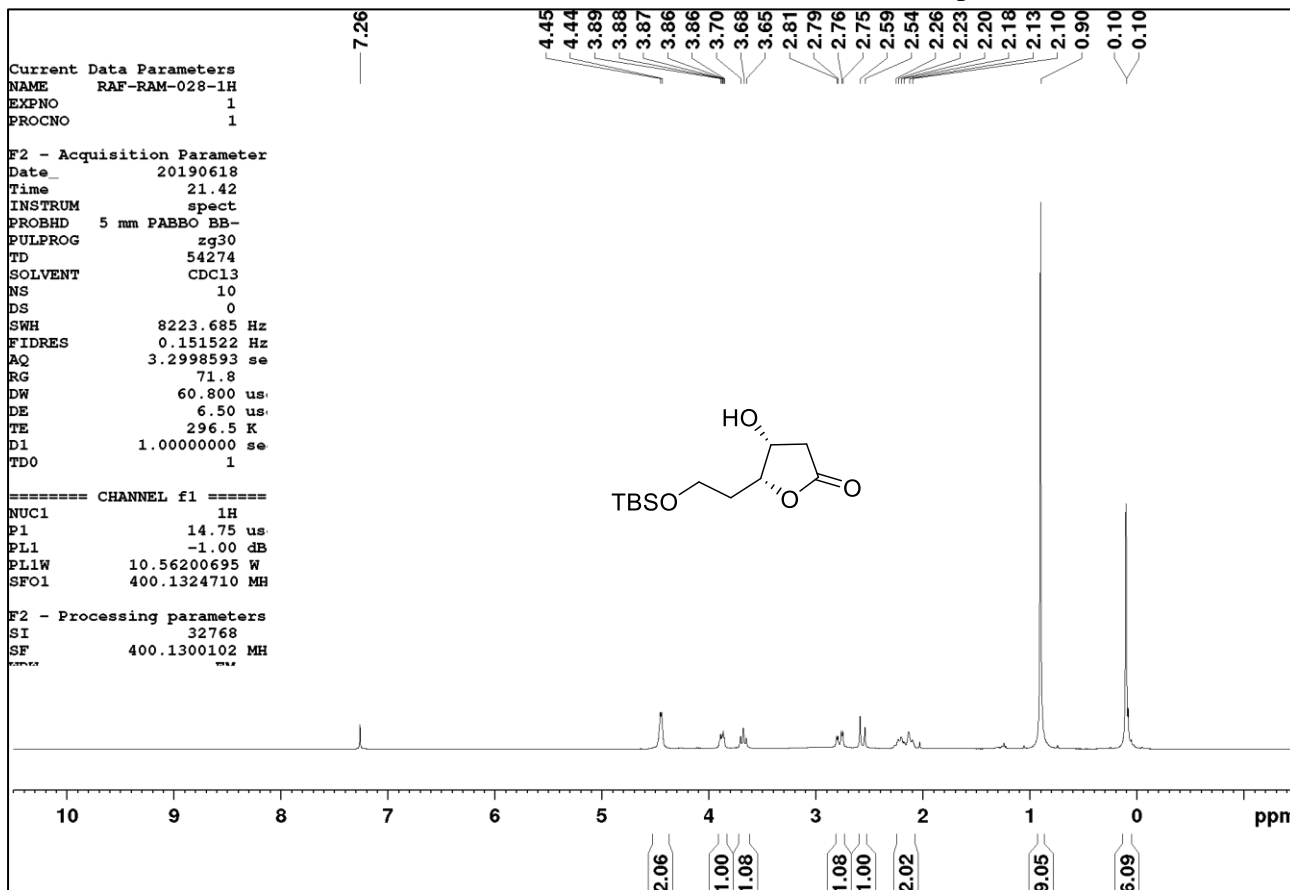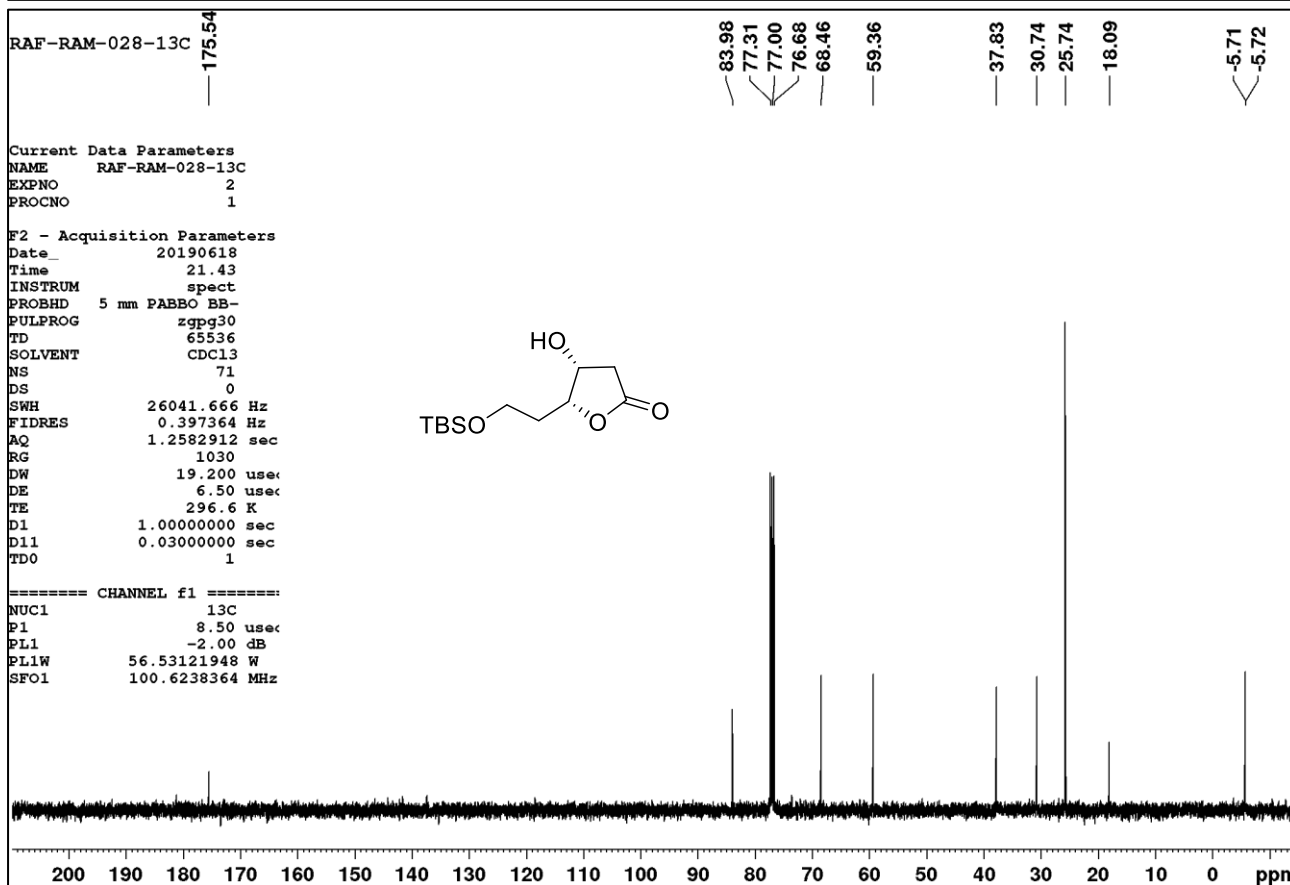

$^1\text{H}$  NMR(400 MHz,  $\text{CDCl}_3$ ) and  $^{13}\text{C}\{^1\text{H}\}$  NMR(100 MHz,  $\text{CDCl}_3$ ) of compound **9b**

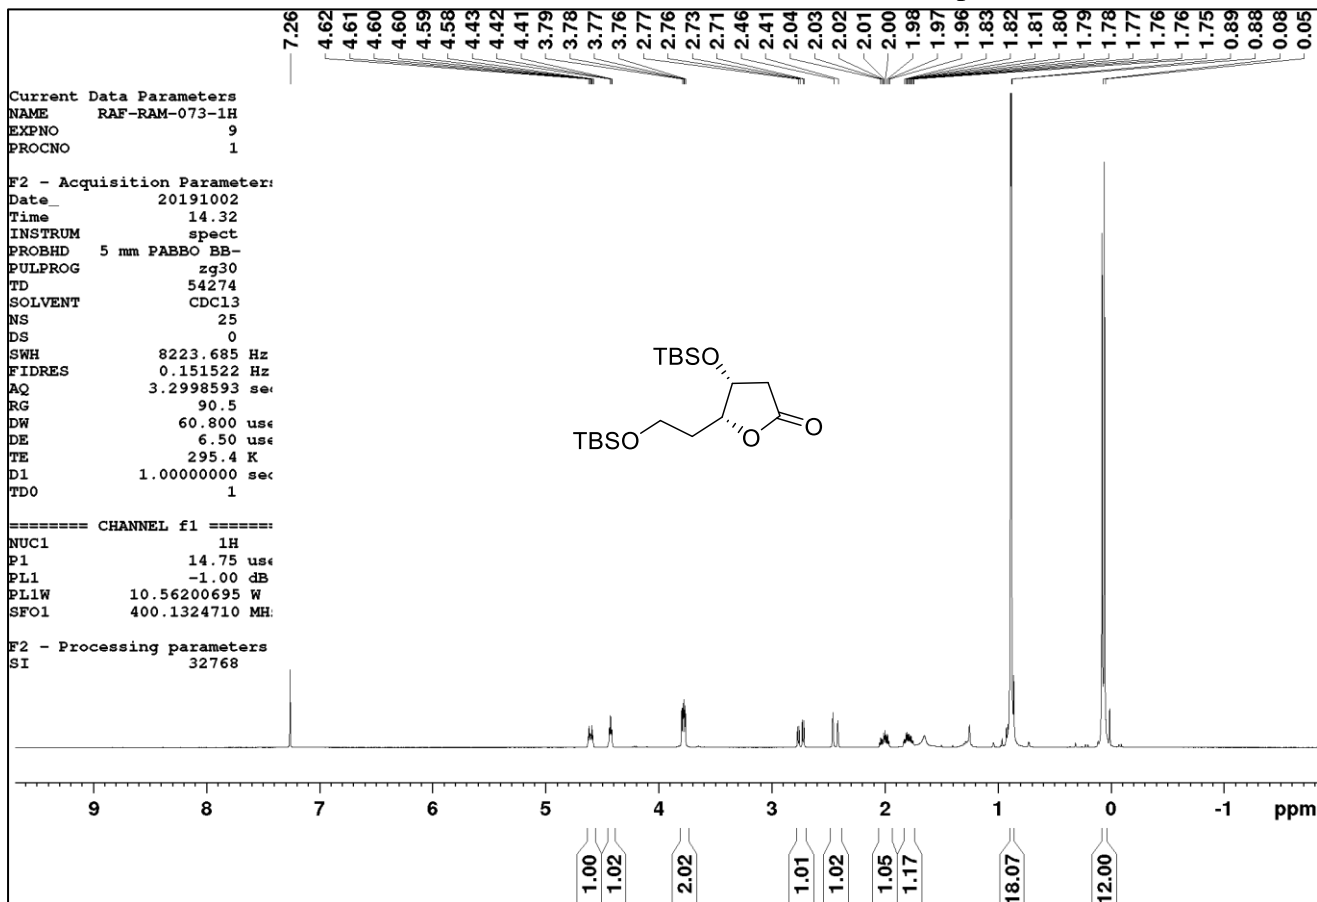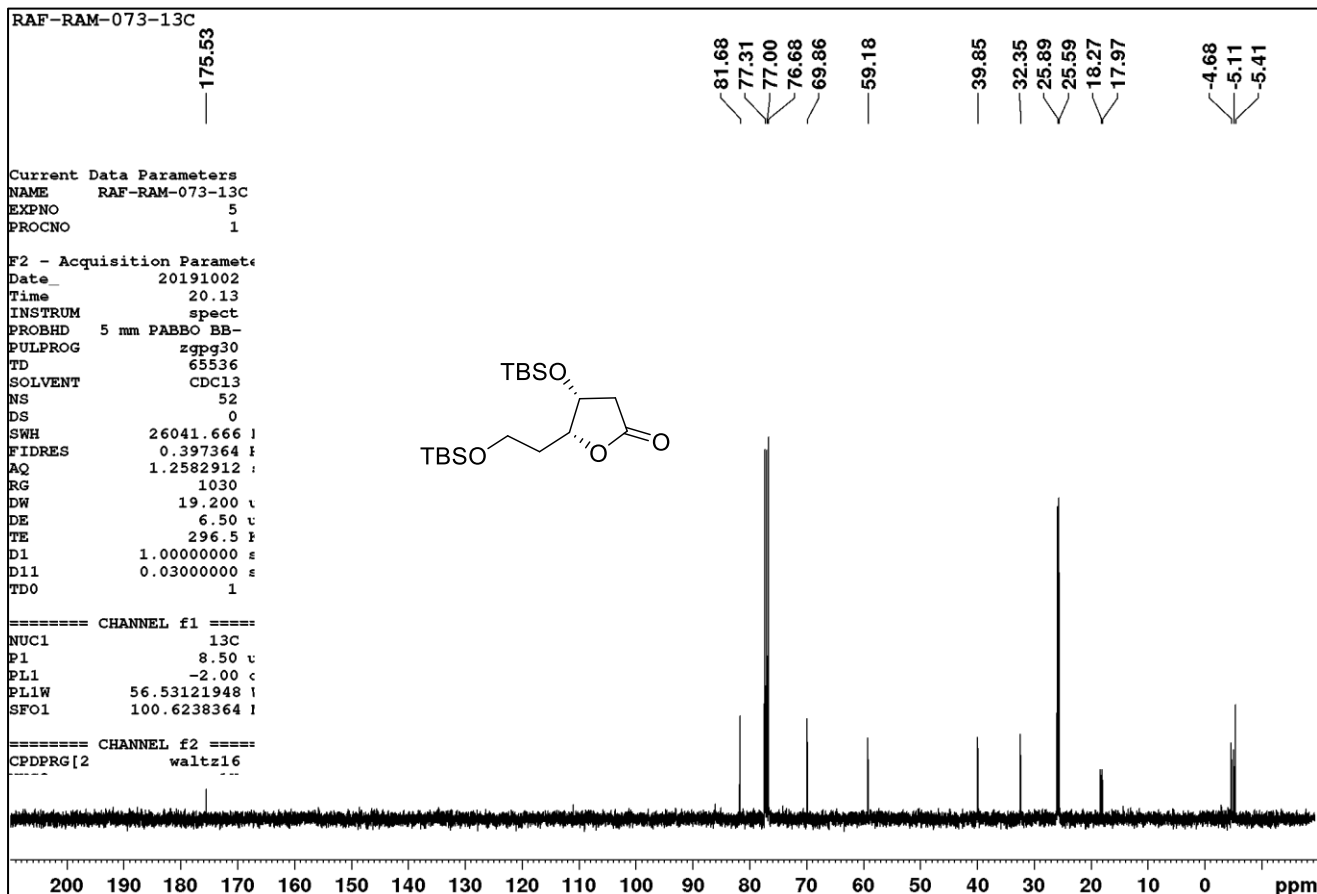

<sup>1</sup>H NMR(400 MHz, CDCl<sub>3</sub>) and <sup>13</sup>C{<sup>1</sup>H} NMR(100 MHz, CDCl<sub>3</sub>) of compound 20a

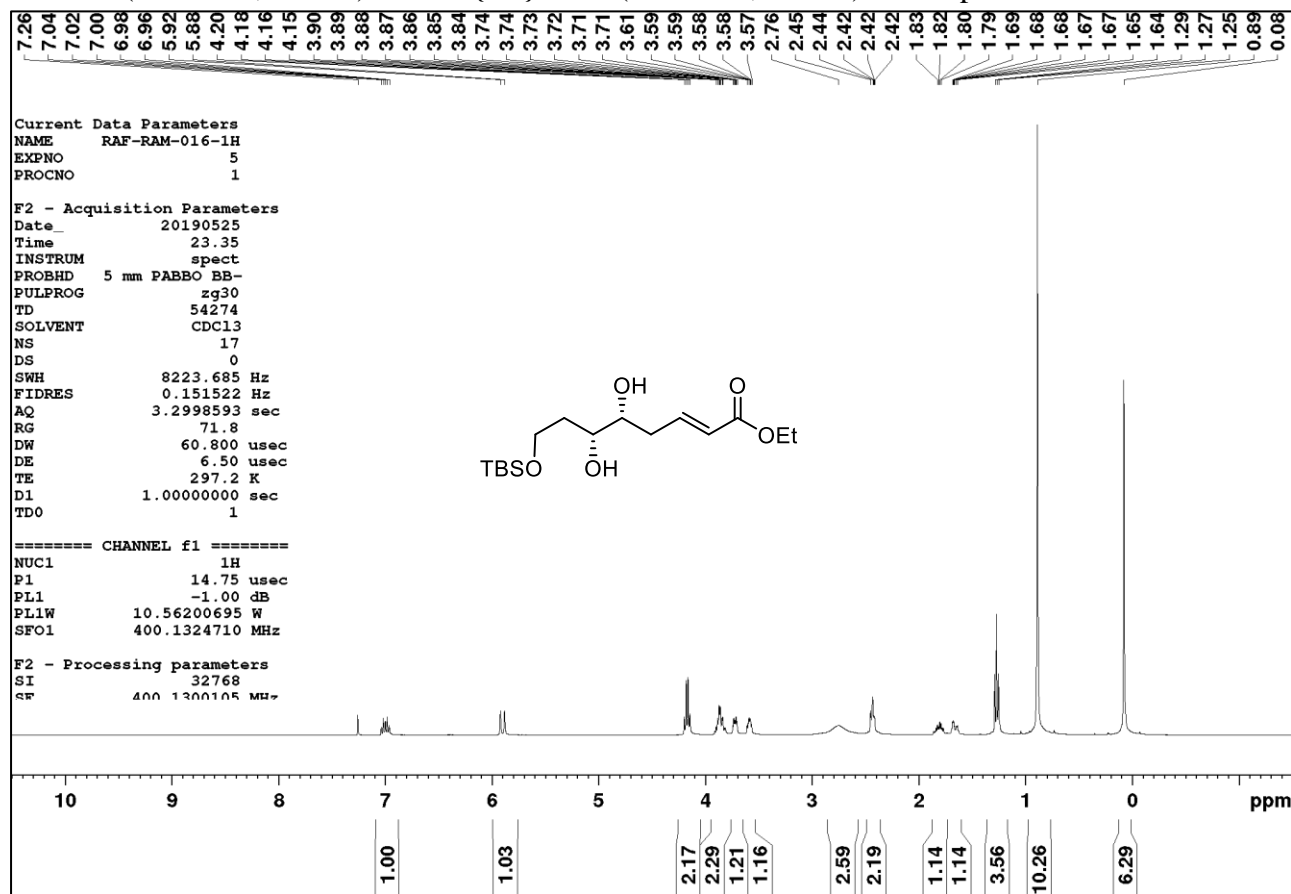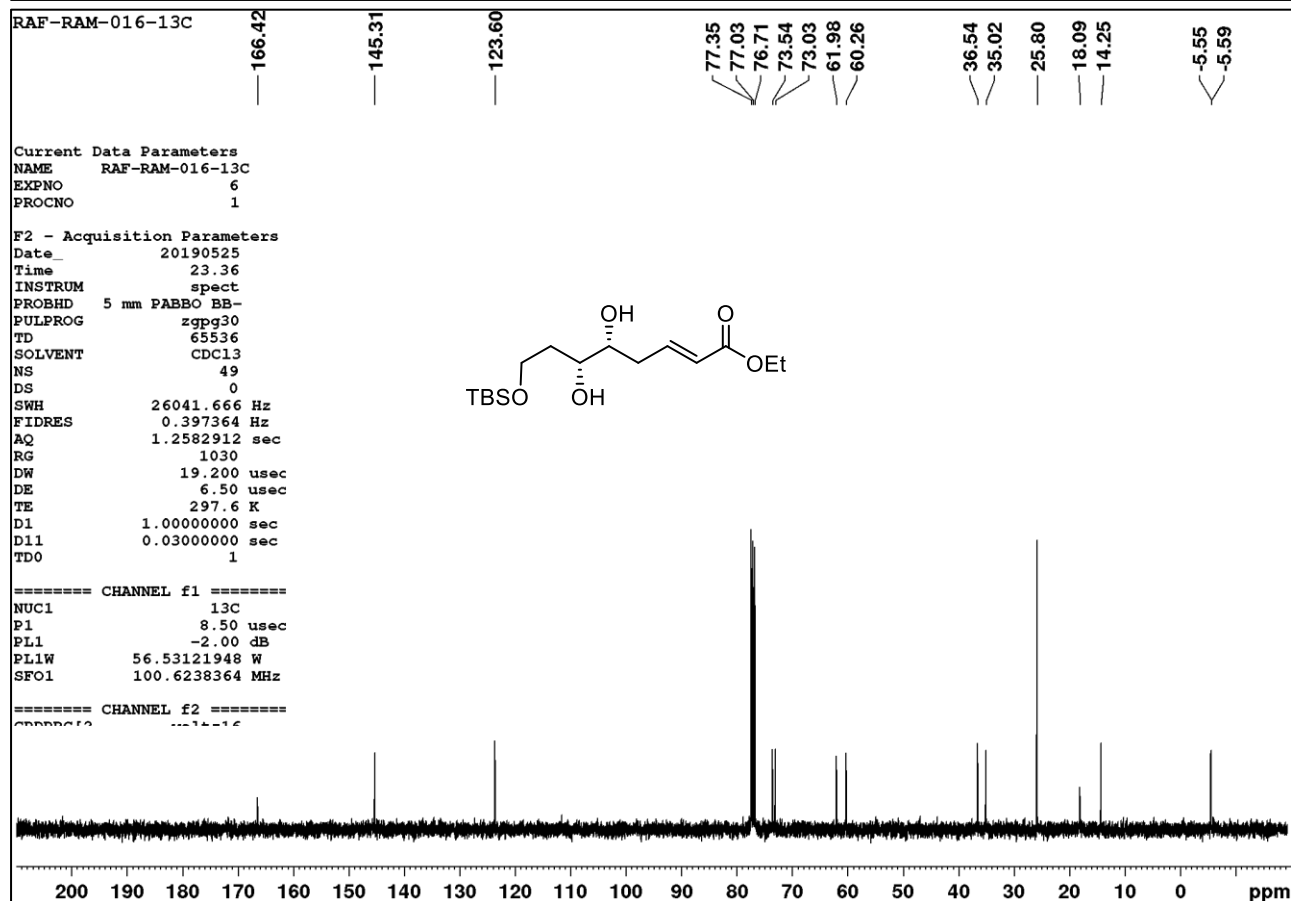

<sup>1</sup>H NMR(400 MHz, CDCl<sub>3</sub>) and <sup>13</sup>C{<sup>1</sup>H} NMR(100 MHz, CDCl<sub>3</sub>) of compound **20b**

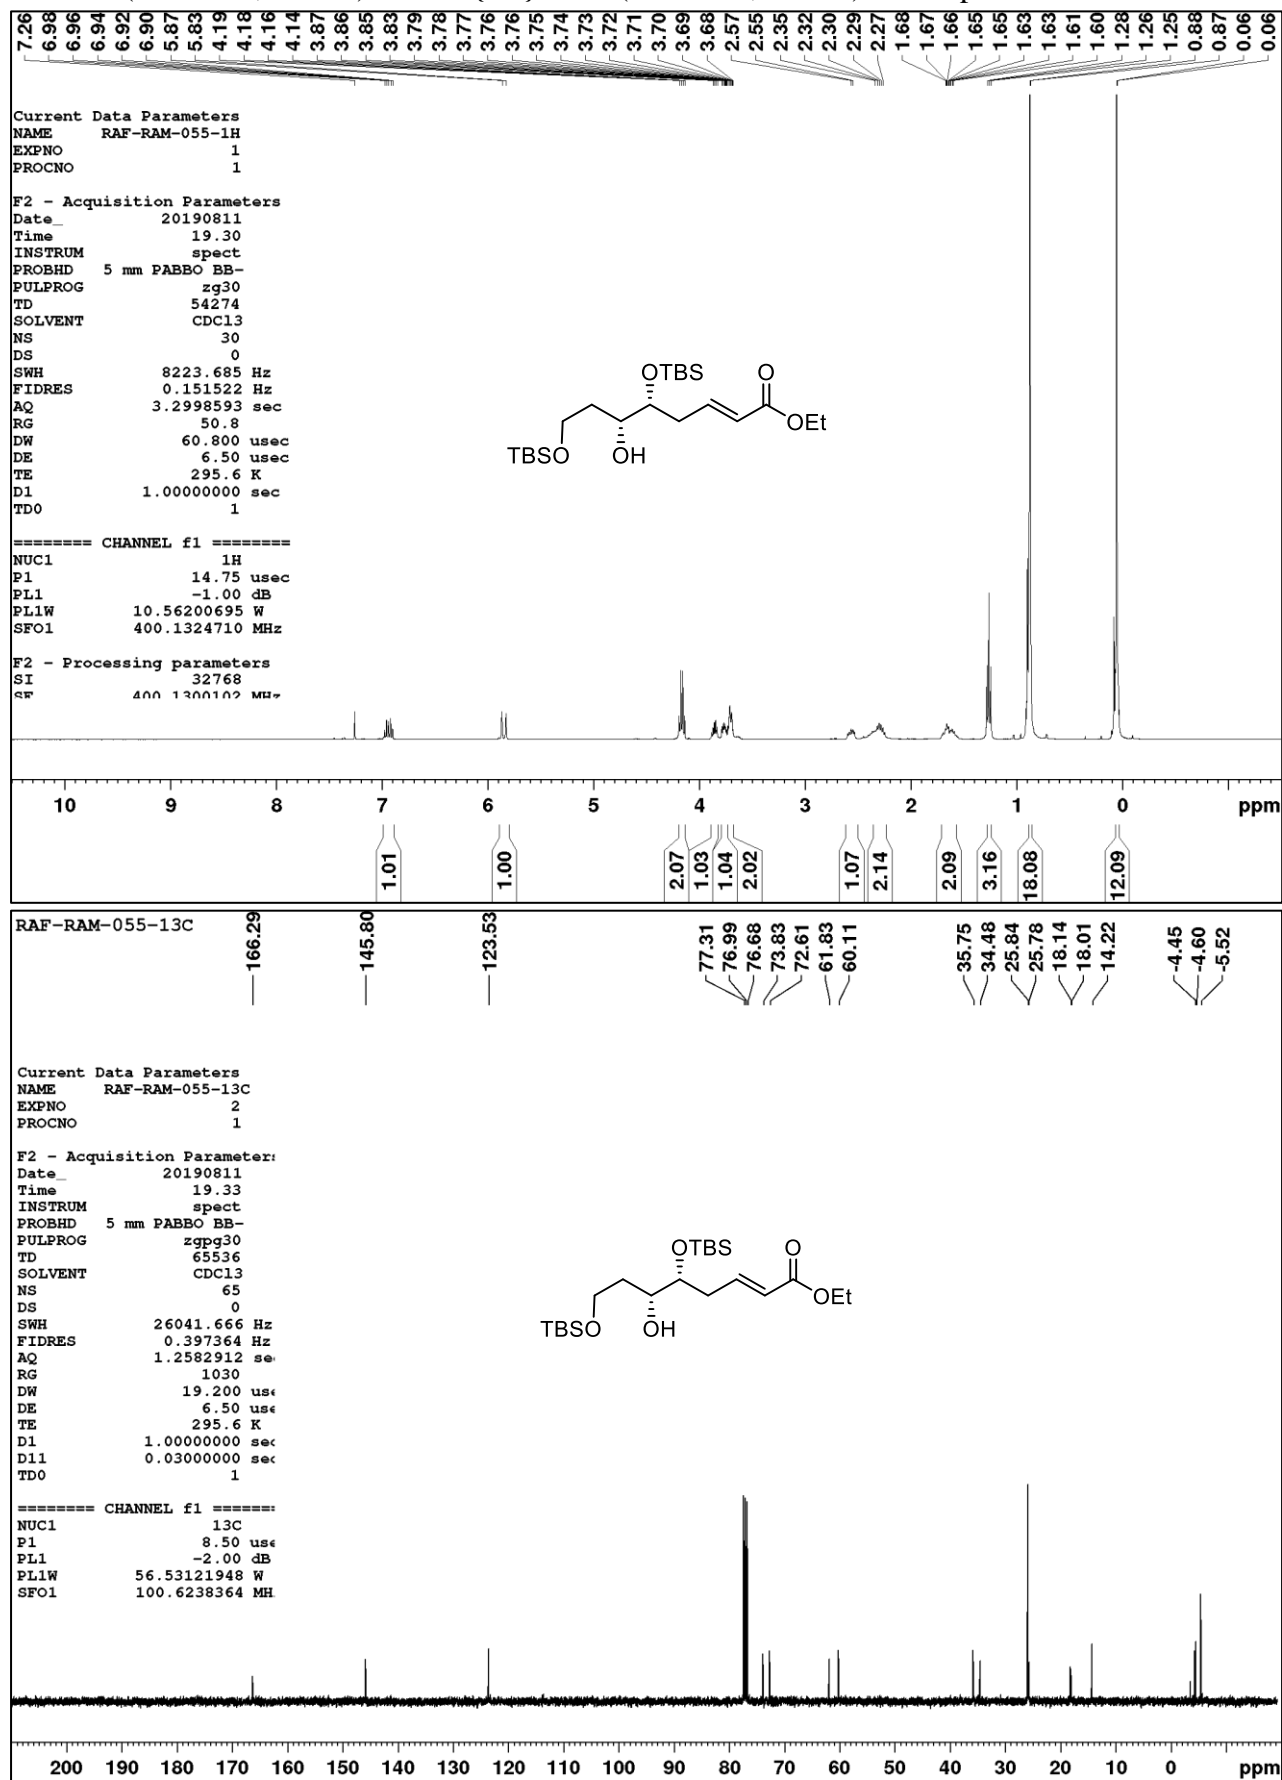

<sup>1</sup>H NMR(500 MHz, CDCl<sub>3</sub>) and <sup>13</sup>C{<sup>1</sup>H} NMR(125 MHz, CDCl<sub>3</sub>) of compound **21a**

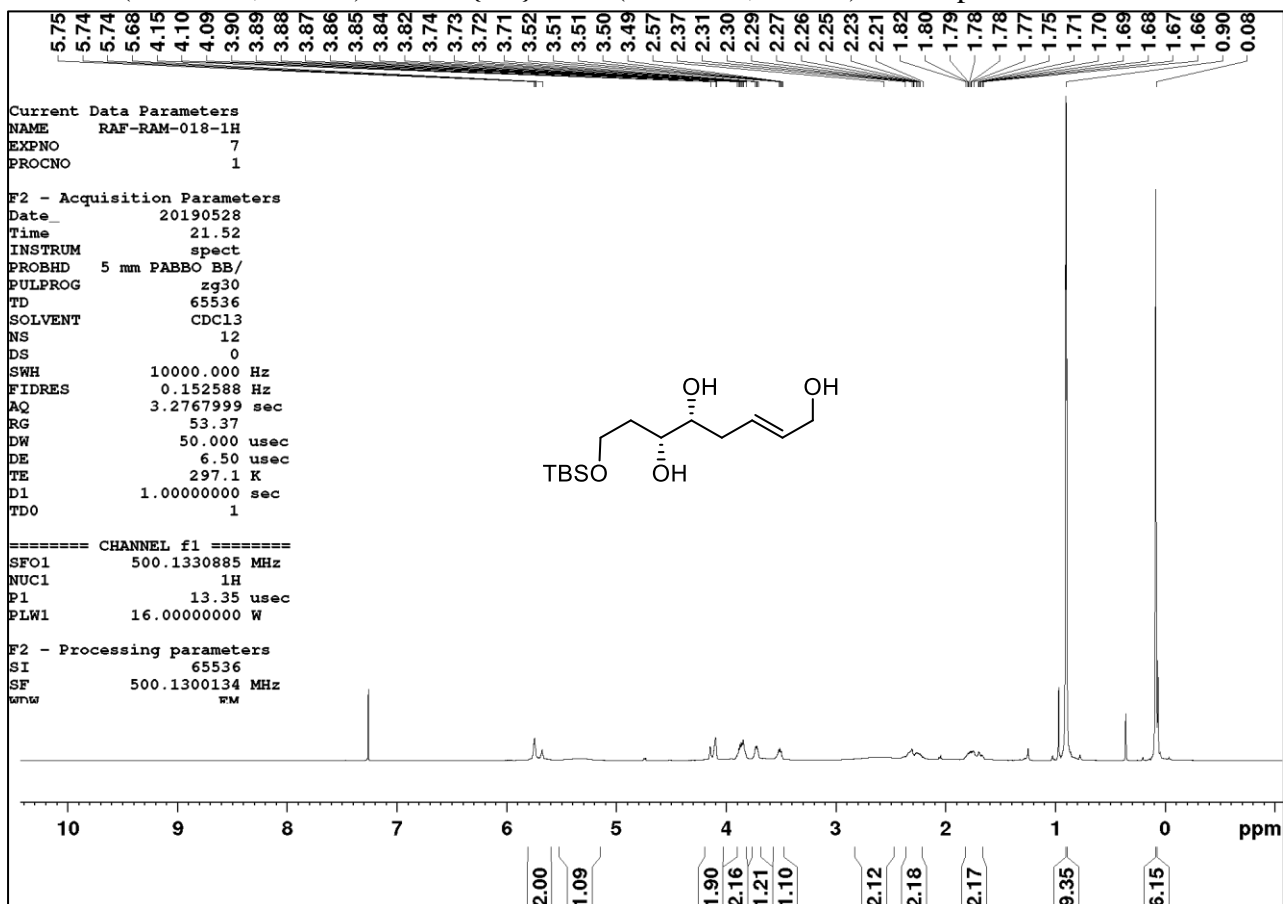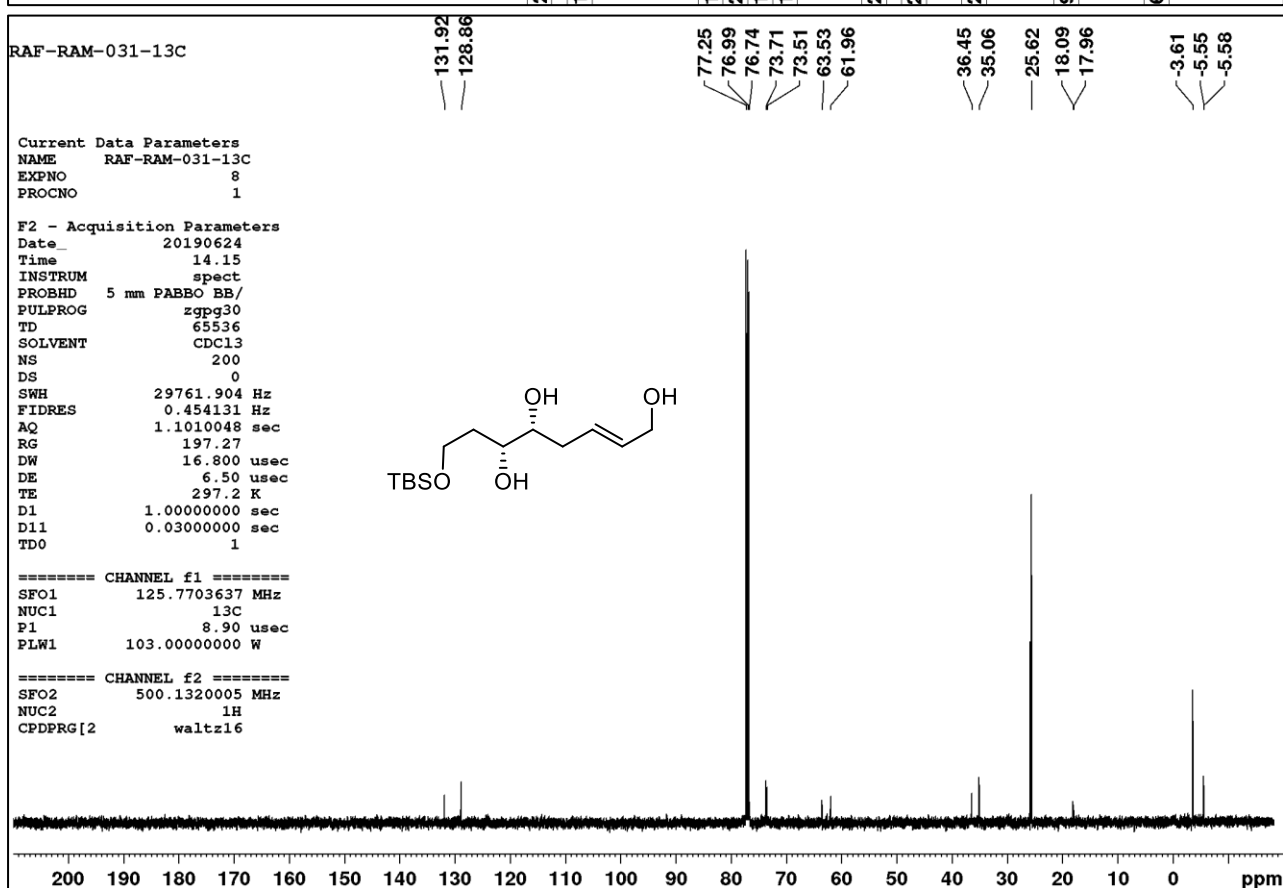

<sup>1</sup>H NMR(400 MHz, CDCl<sub>3</sub>) and <sup>13</sup>C{<sup>1</sup>H} NMR(100 MHz, CDCl<sub>3</sub>) of compound **21b**

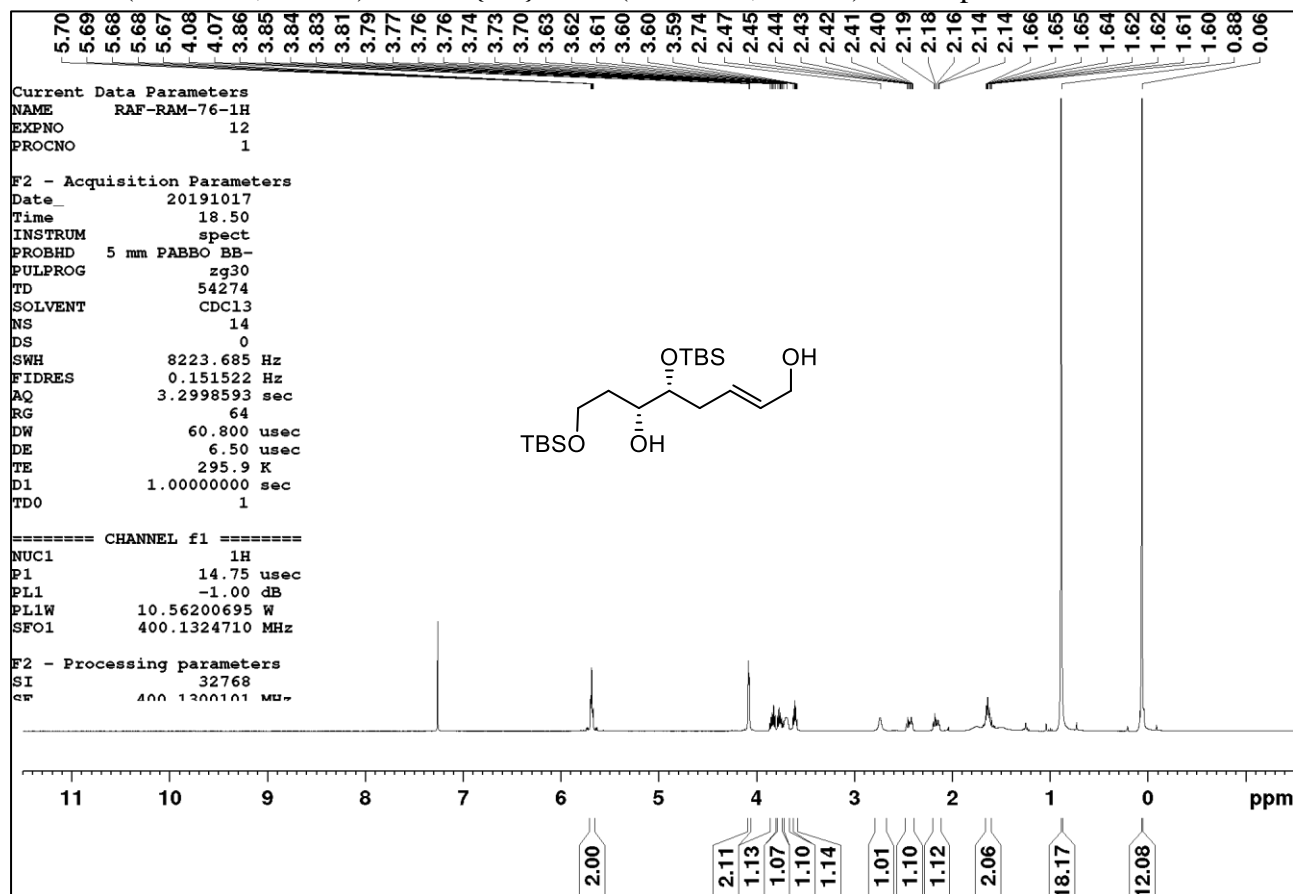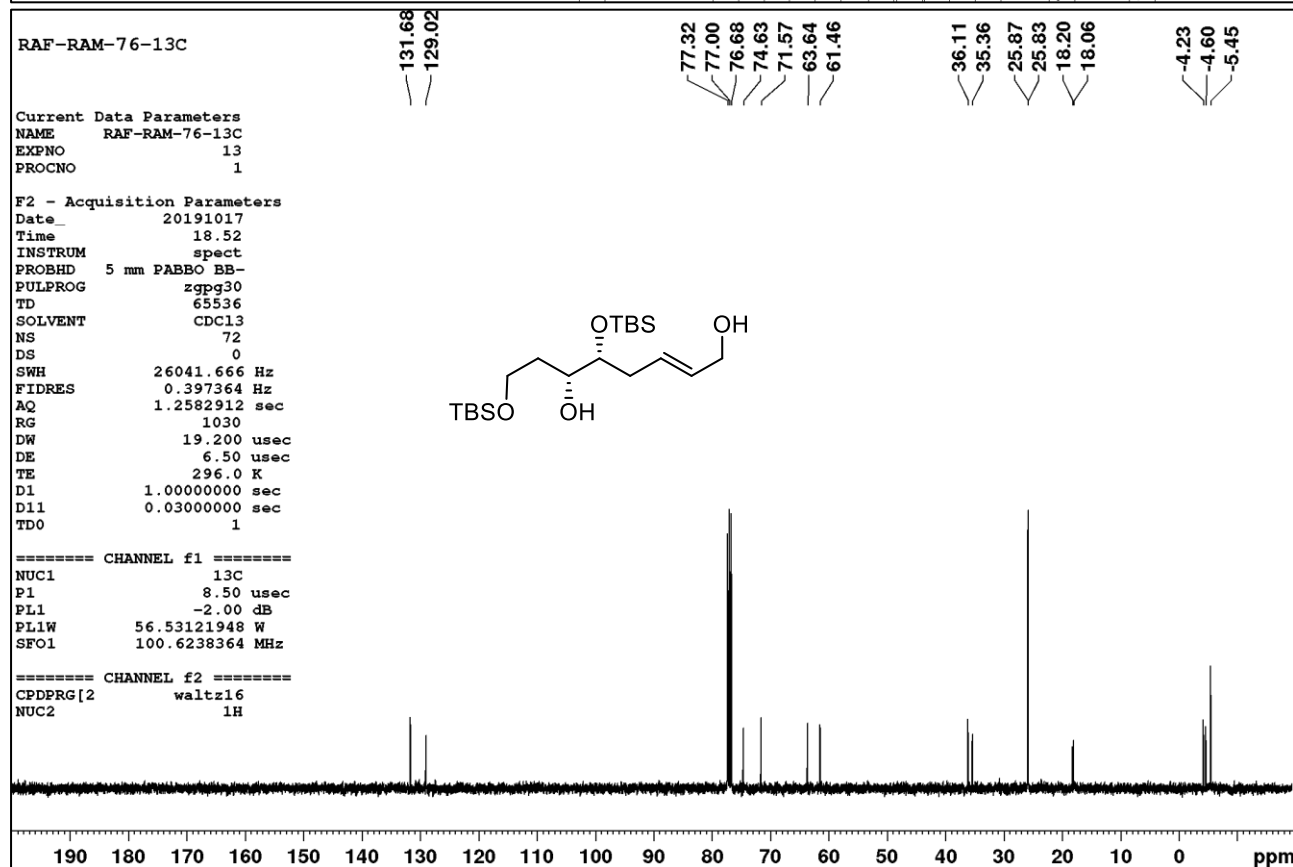



<sup>1</sup>H NMR(400 MHz, CDCl<sub>3</sub>) and <sup>13</sup>C{<sup>1</sup>H} NMR(100 MHz, CDCl<sub>3</sub>) of compound **8b**

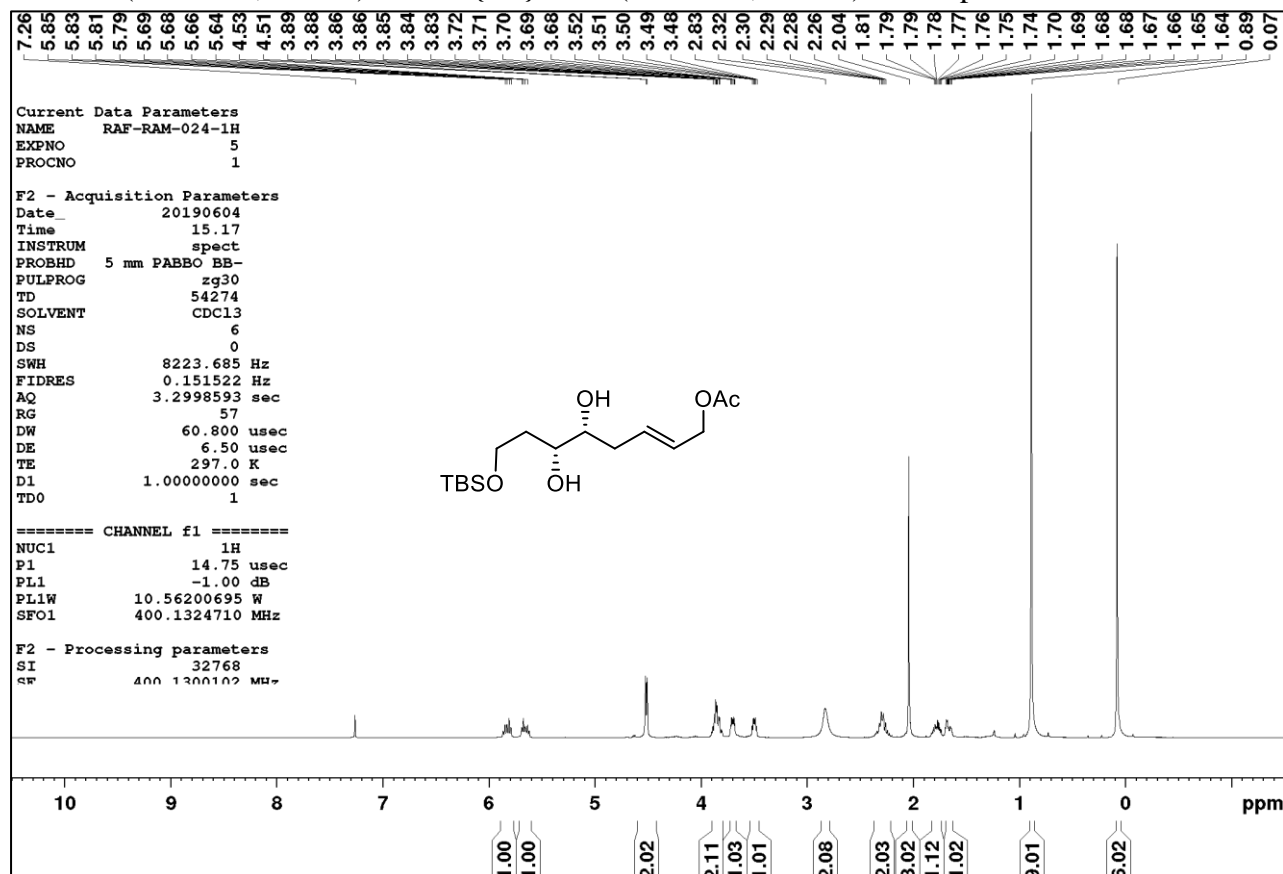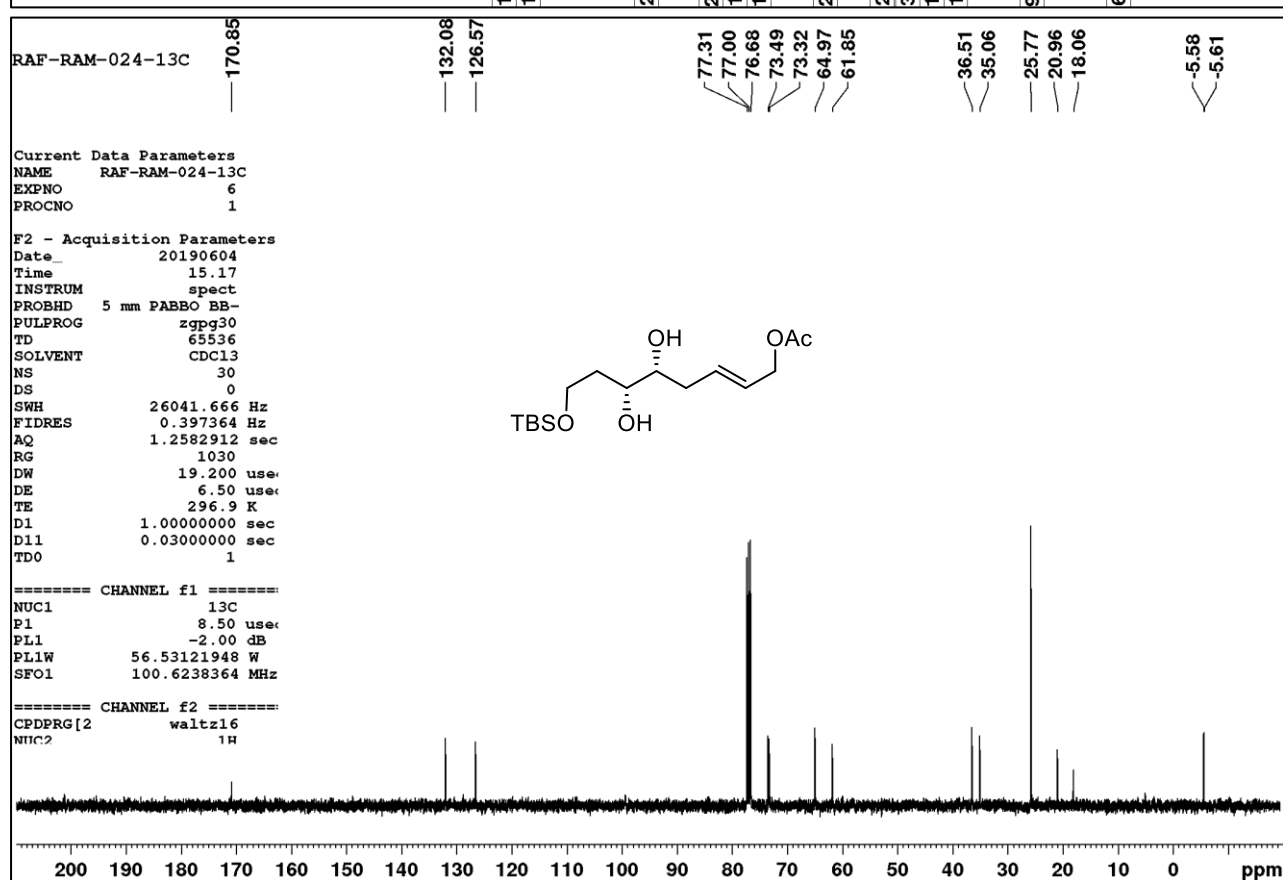



<sup>1</sup>H NMR(500 MHz, CDCl<sub>3</sub>) and <sup>13</sup>C{<sup>1</sup>H} NMR(125 MHz, CDCl<sub>3</sub>) of compound **7b**

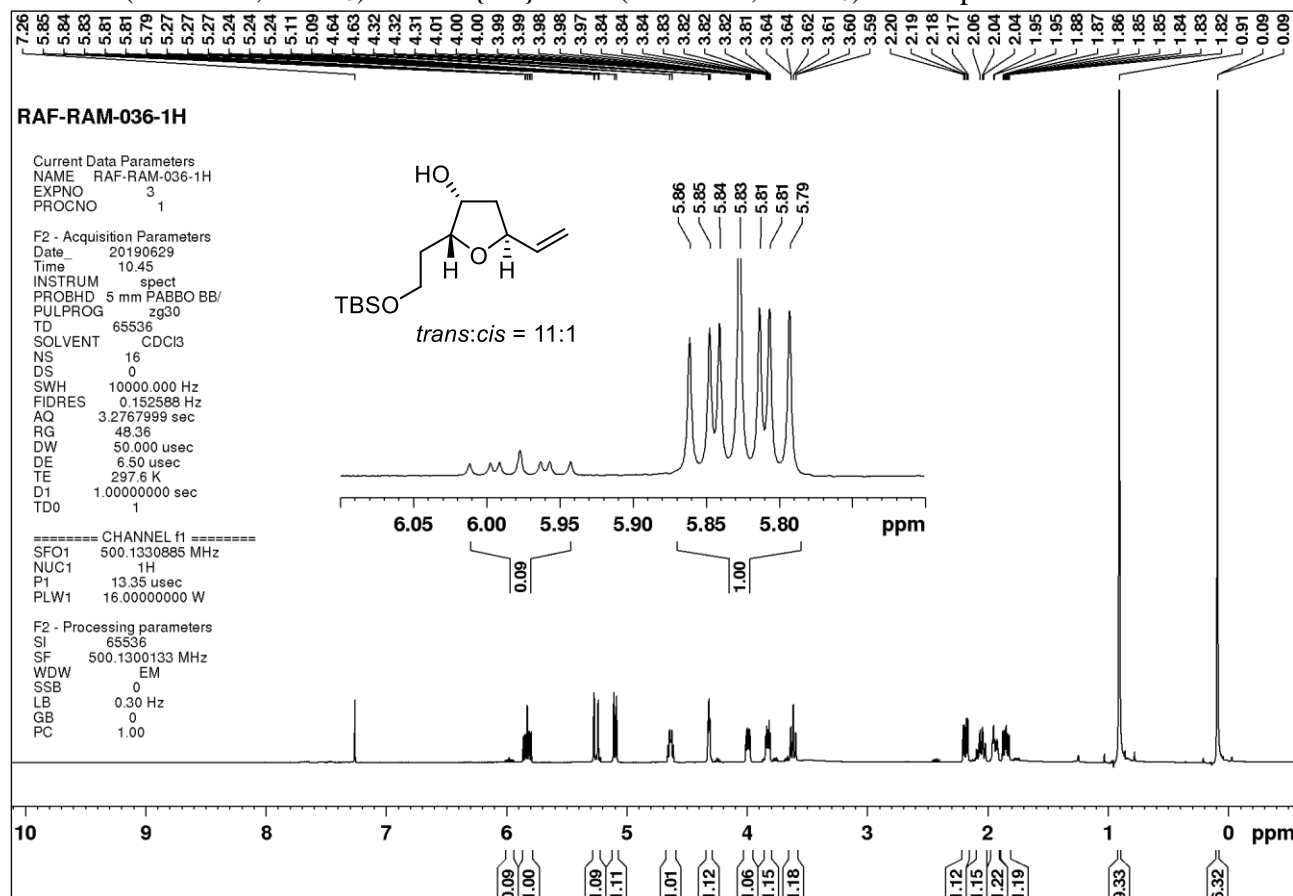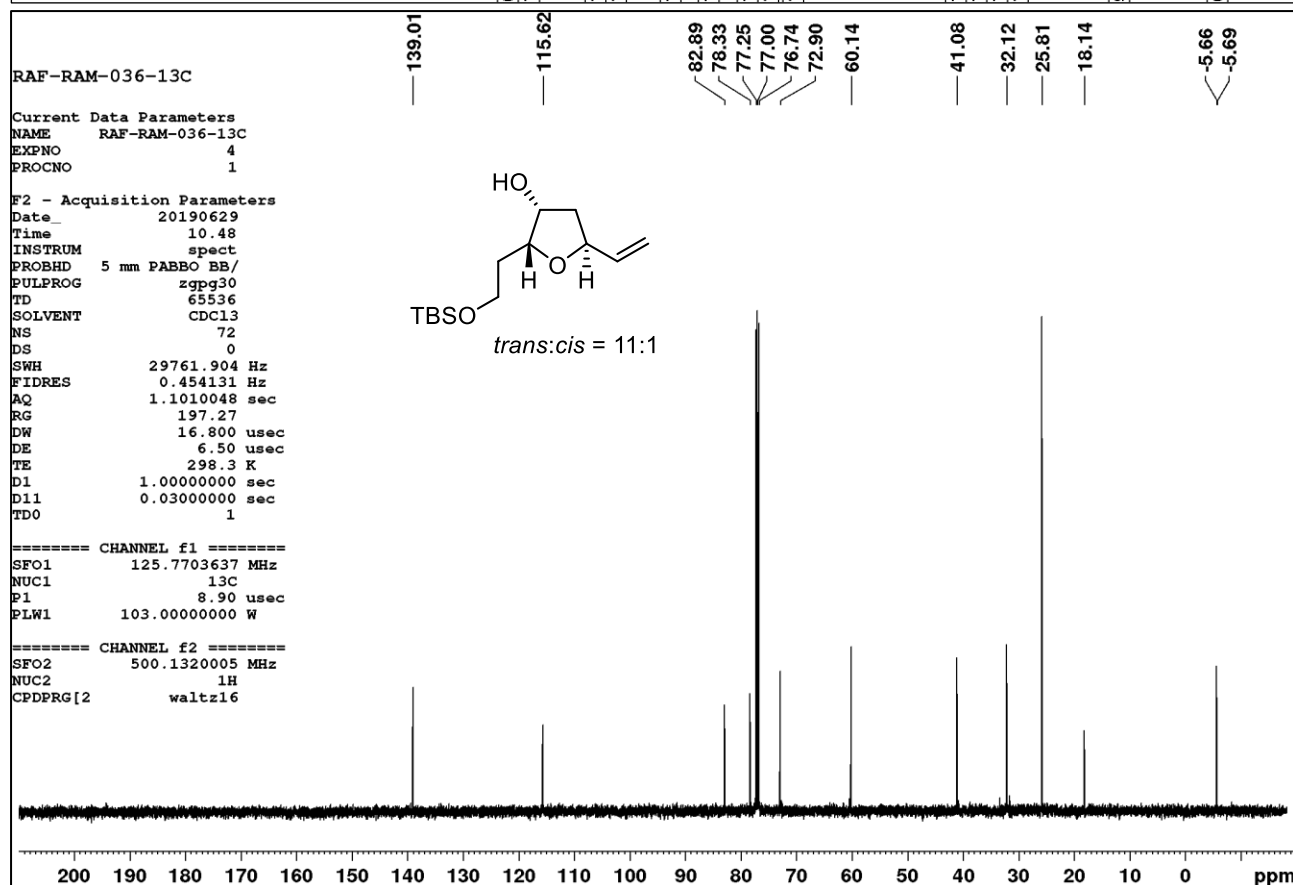





<sup>1</sup>H NMR(500 MHz, CDCl<sub>3</sub>) and <sup>13</sup>C{<sup>1</sup>H} NMR(125 MHz, CDCl<sub>3</sub>) of compound 22a

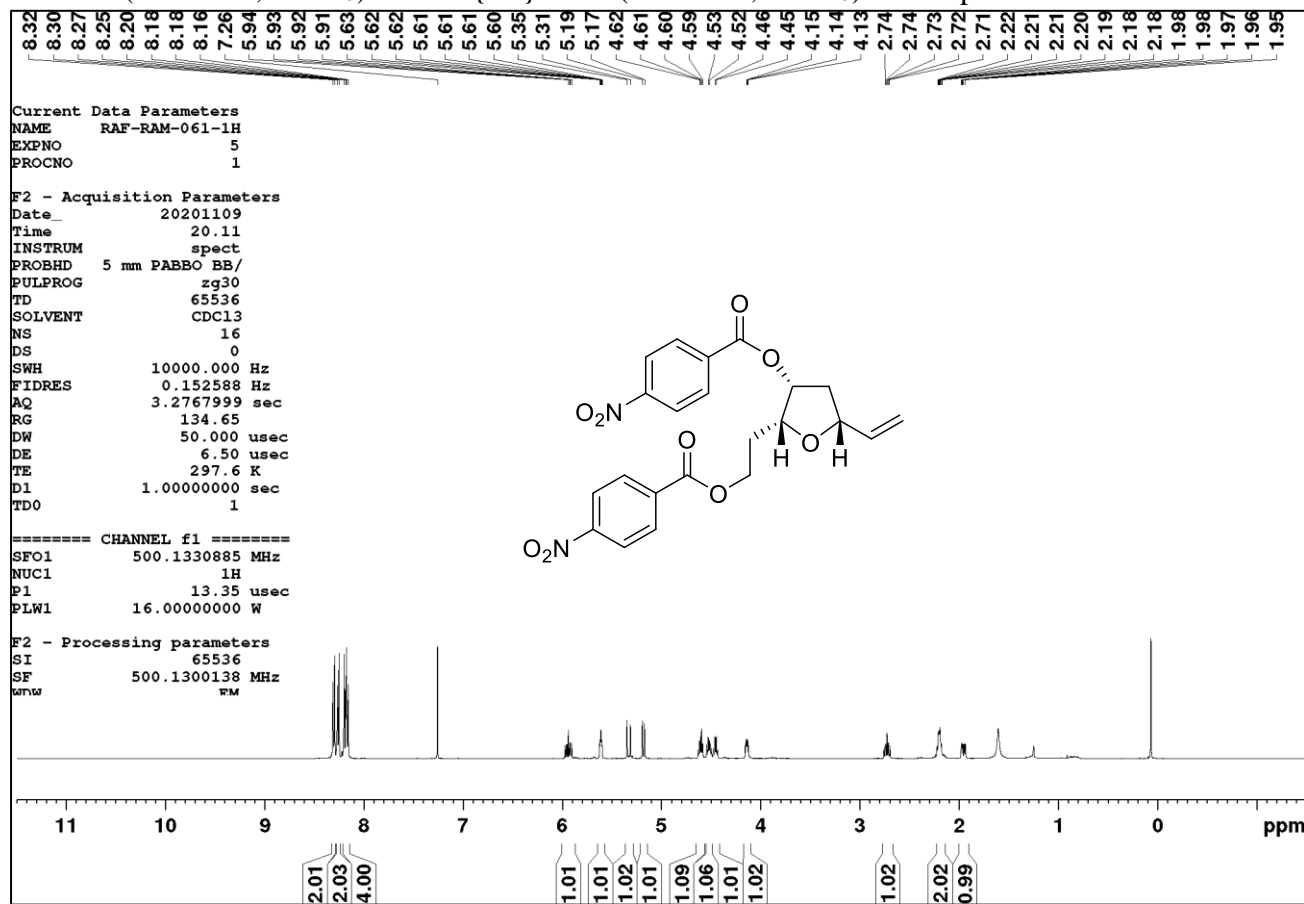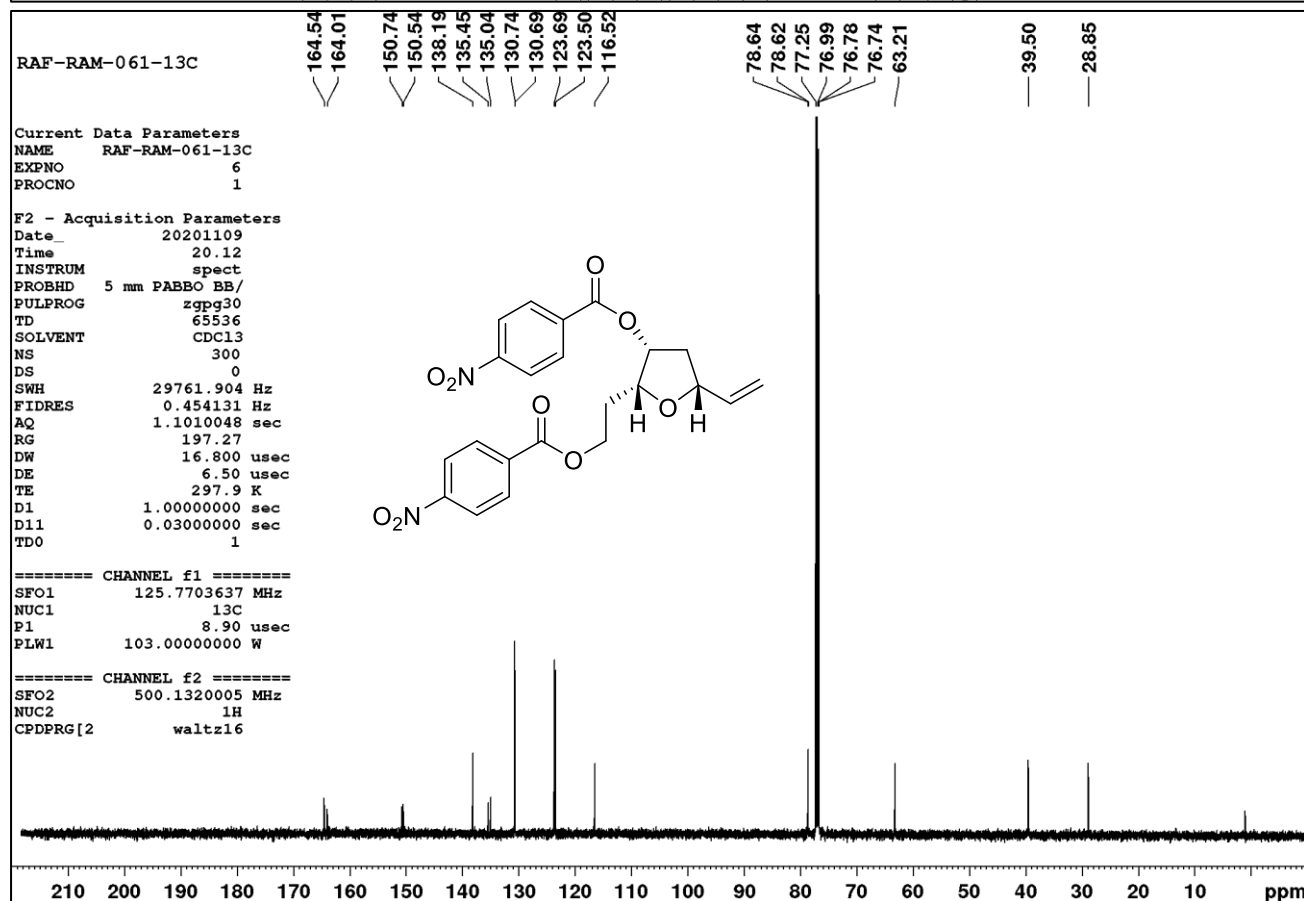

<sup>1</sup>H NMR (400 MHz, CDCl<sub>3</sub>) and <sup>13</sup>C{<sup>1</sup>H} NMR (100 MHz, CDCl<sub>3</sub>) of compound **12a**

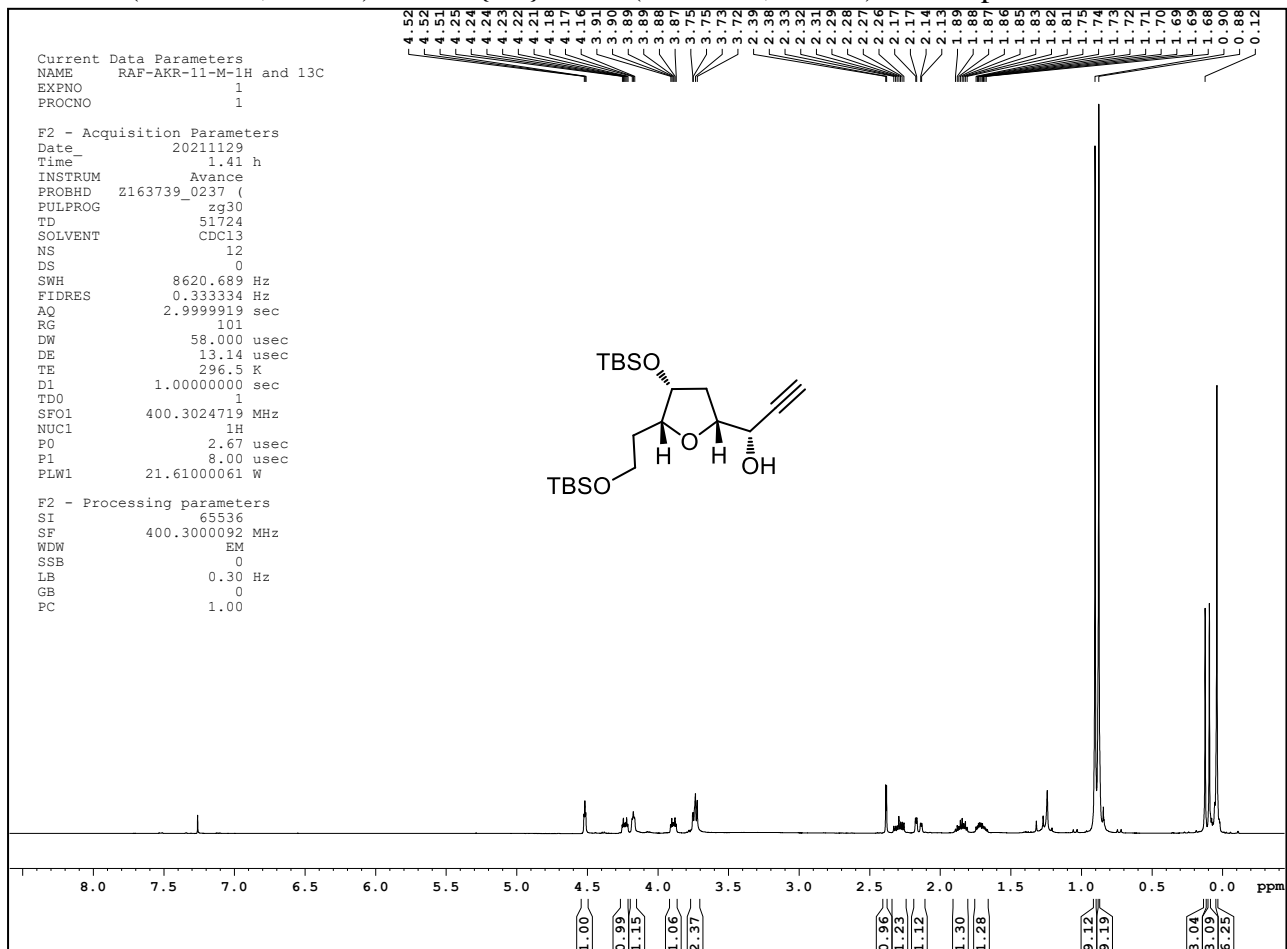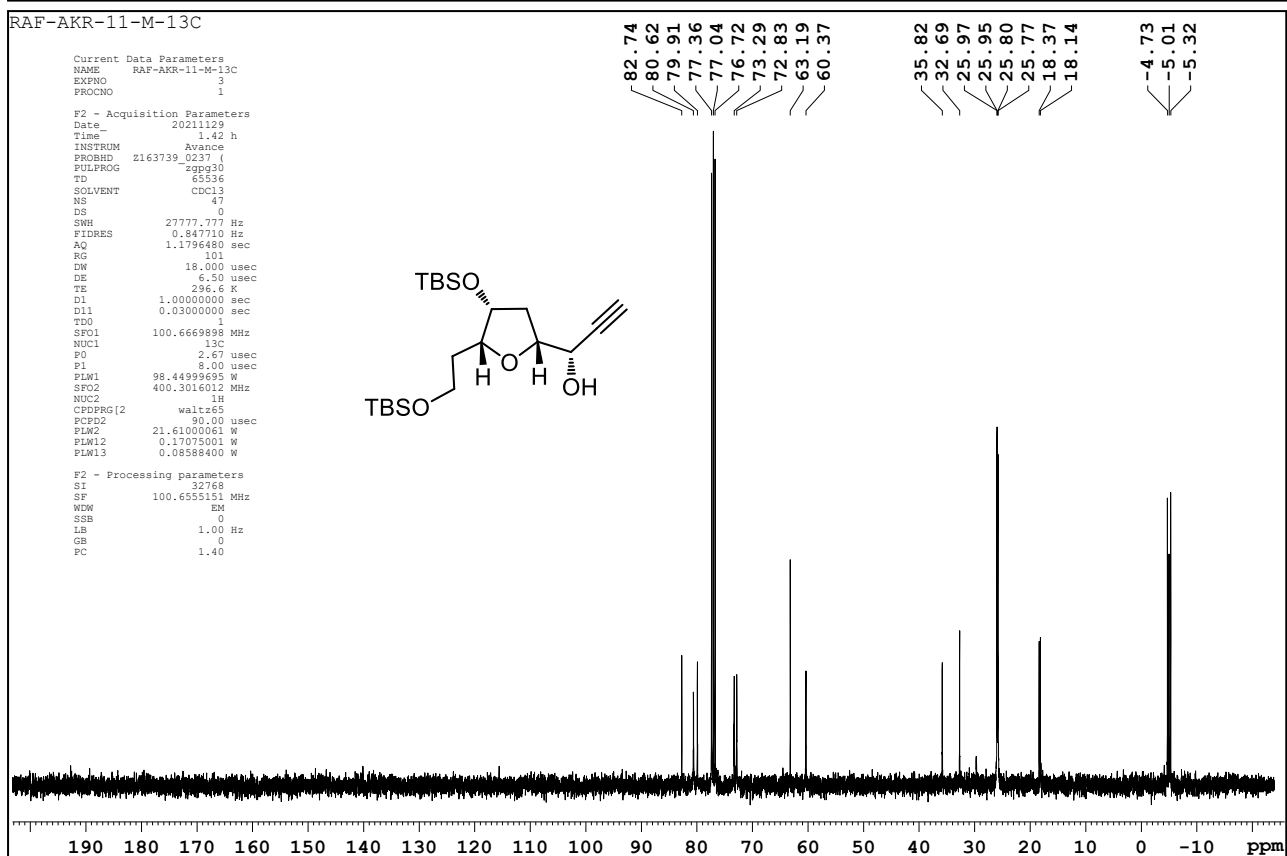

<sup>1</sup>H NMR (400 MHz, CDCl<sub>3</sub>) and <sup>13</sup>C{<sup>1</sup>H} NMR (100 MHz, CDCl<sub>3</sub>) of compound **12b**

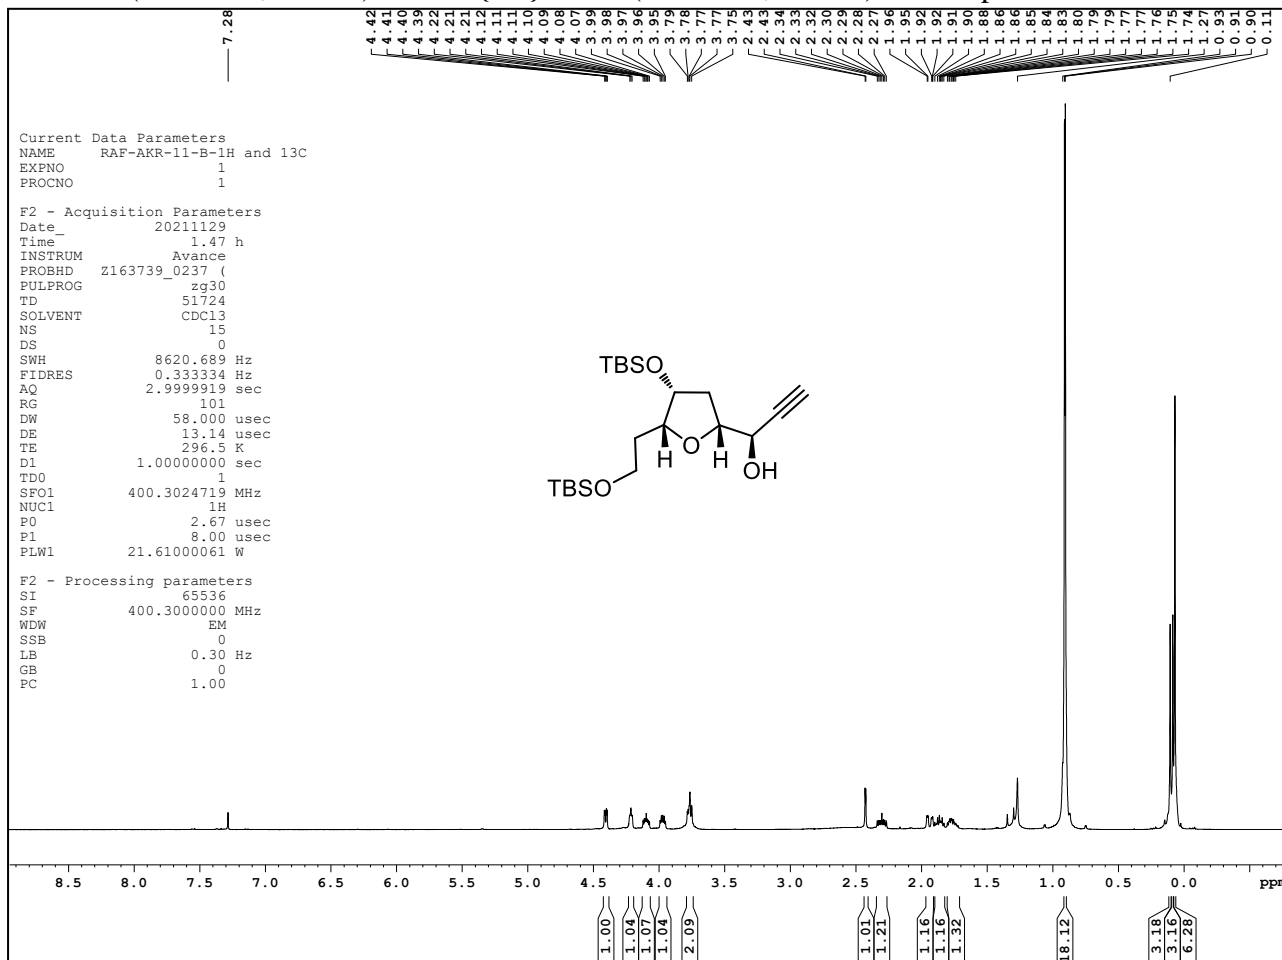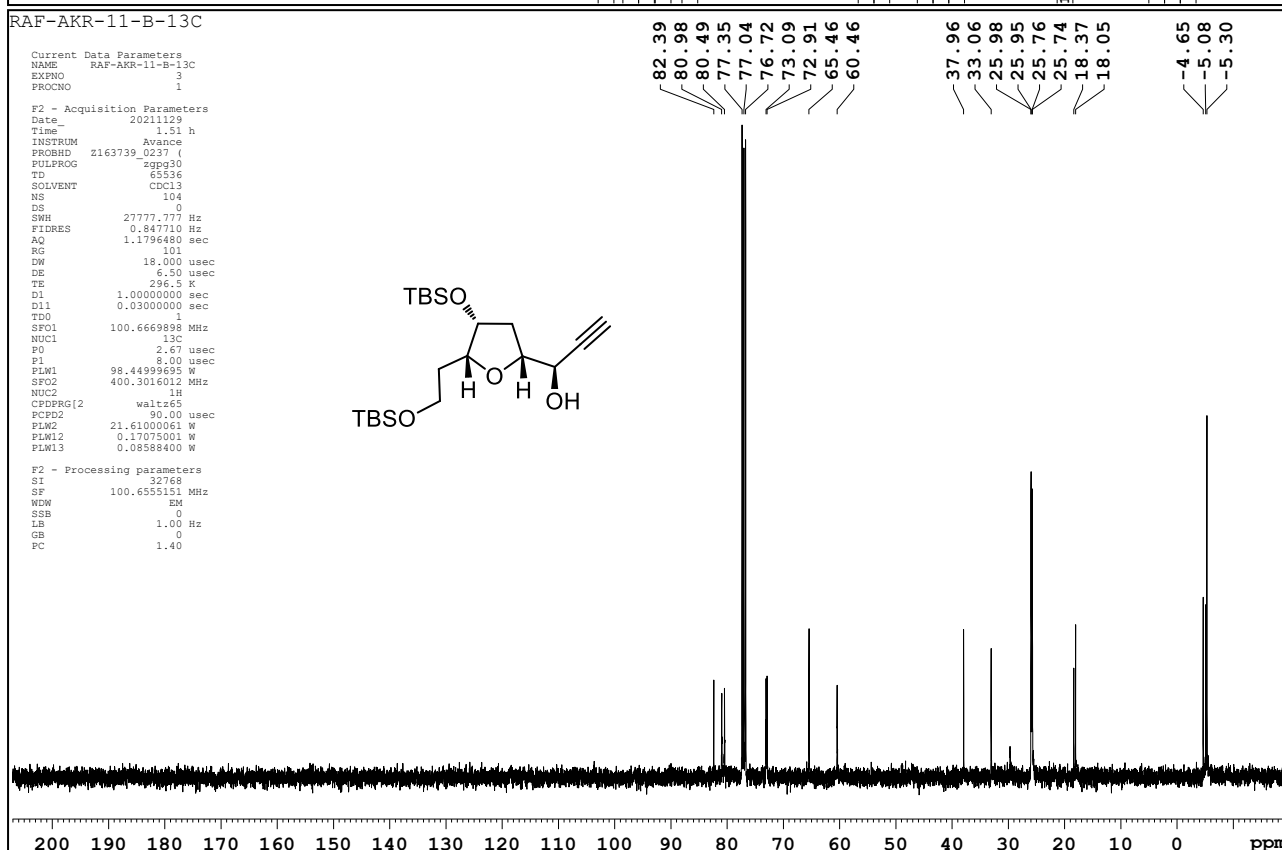



<sup>1</sup>H NMR (400 MHz, CDCl<sub>3</sub>) and <sup>13</sup>C{<sup>1</sup>H} NMR (125 MHz, CDCl<sub>3</sub>) of compound **6b**

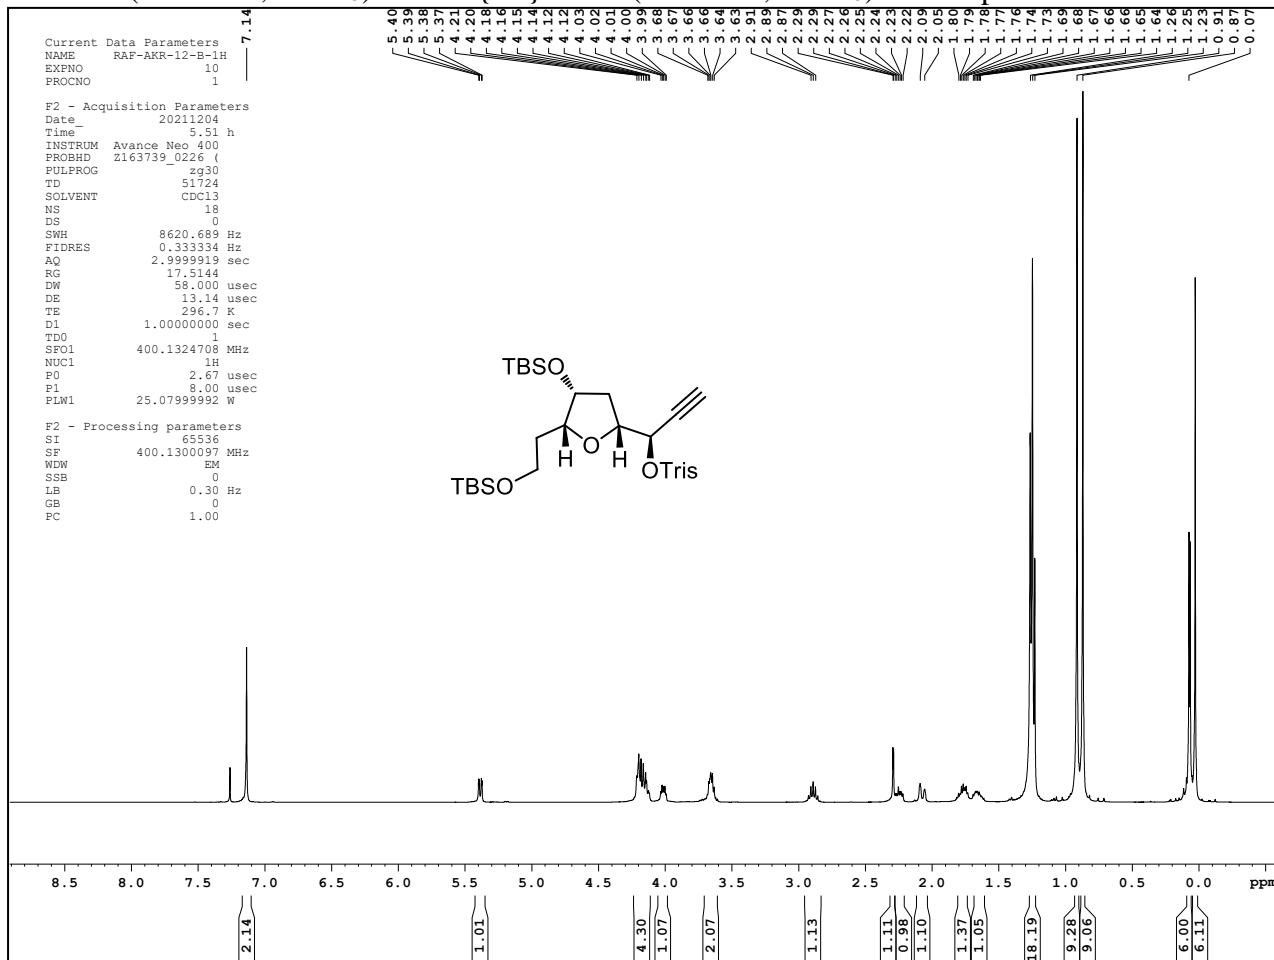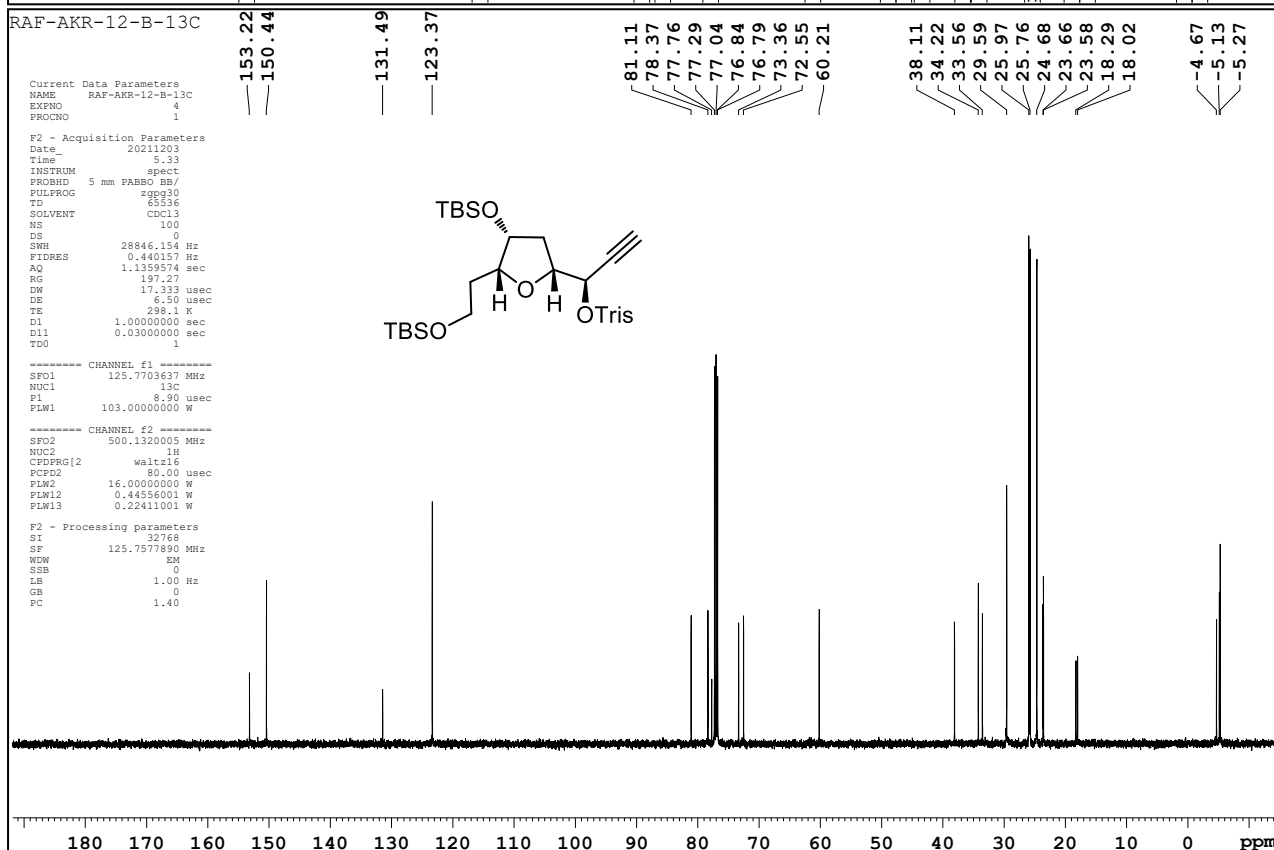

<sup>1</sup>H NMR (400 MHz, CDCl<sub>3</sub>) and <sup>13</sup>C{<sup>1</sup>H} NMR (100 MHz, CDCl<sub>3</sub>) of compound **13a**

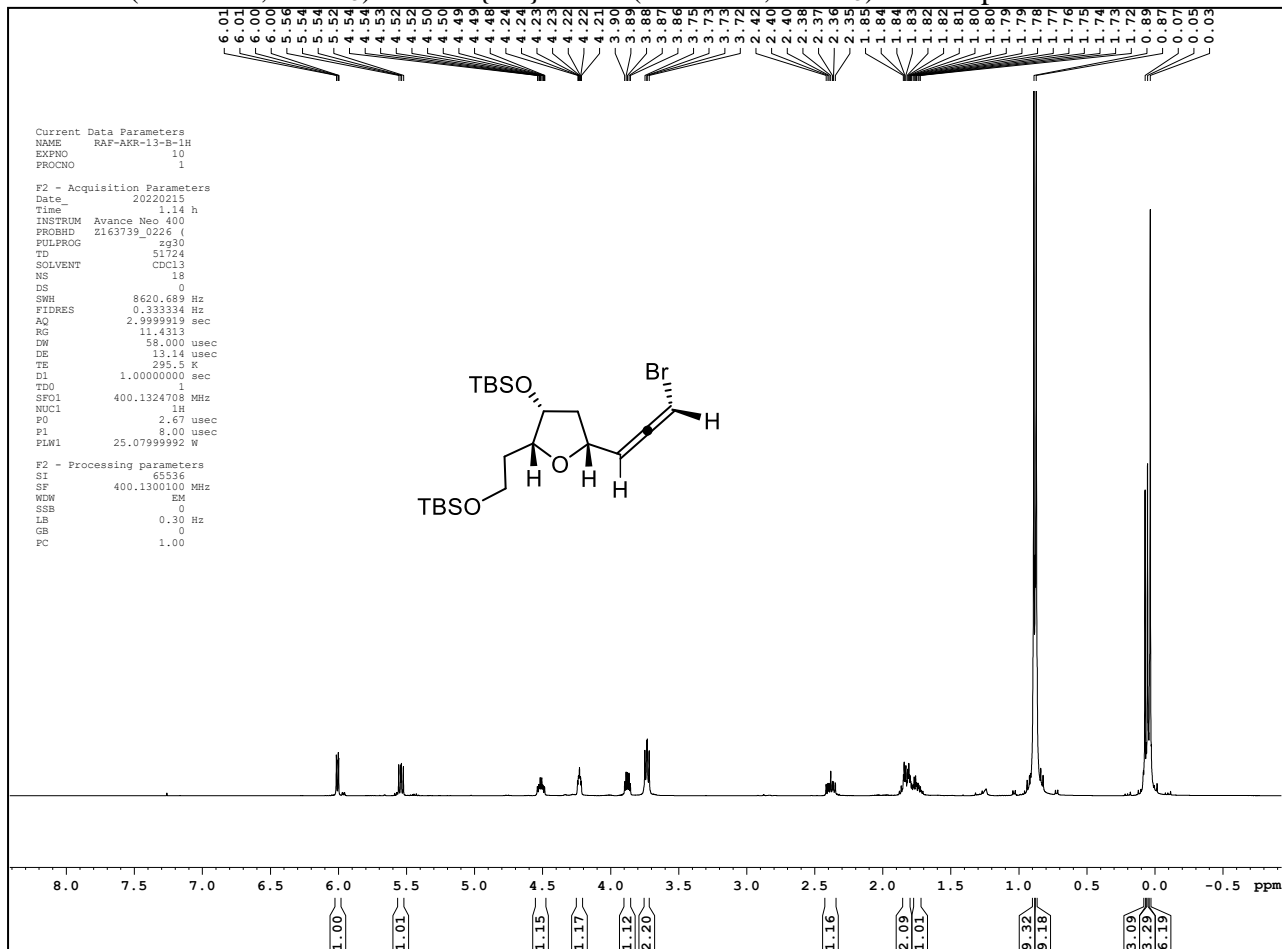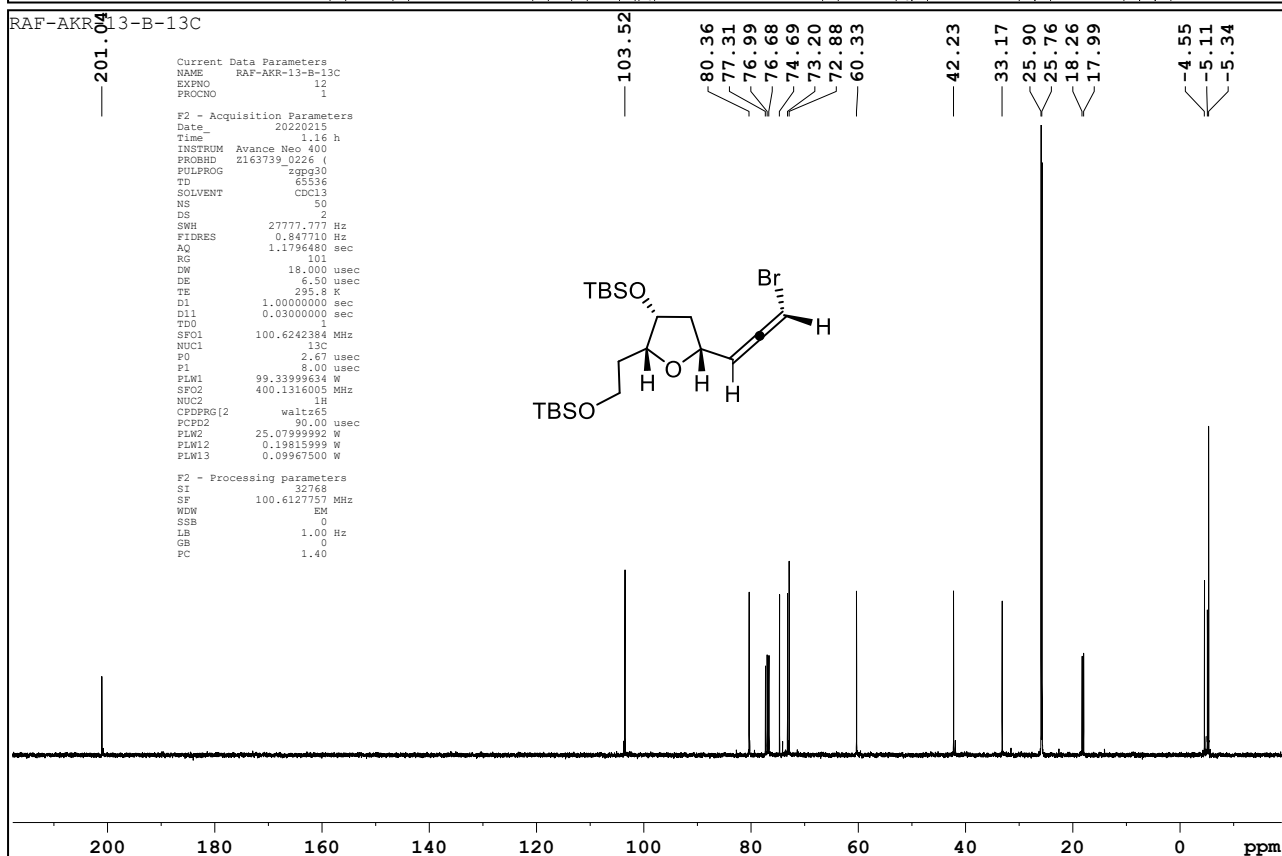

<sup>1</sup>H NMR (400 MHz, CDCl<sub>3</sub>) and <sup>13</sup>C{<sup>1</sup>H} NMR (100 MHz, CDCl<sub>3</sub>) of compound **14a**

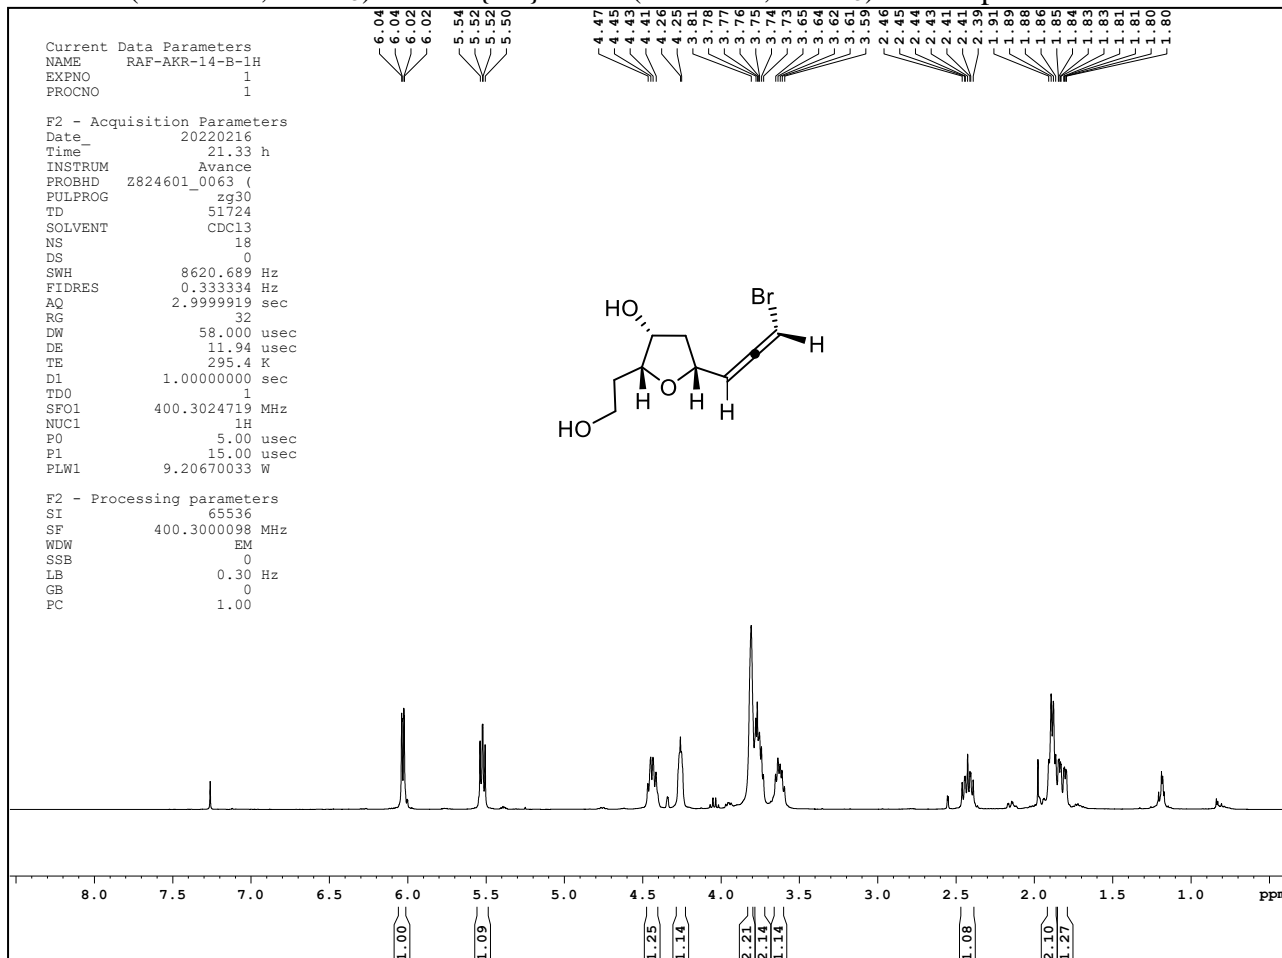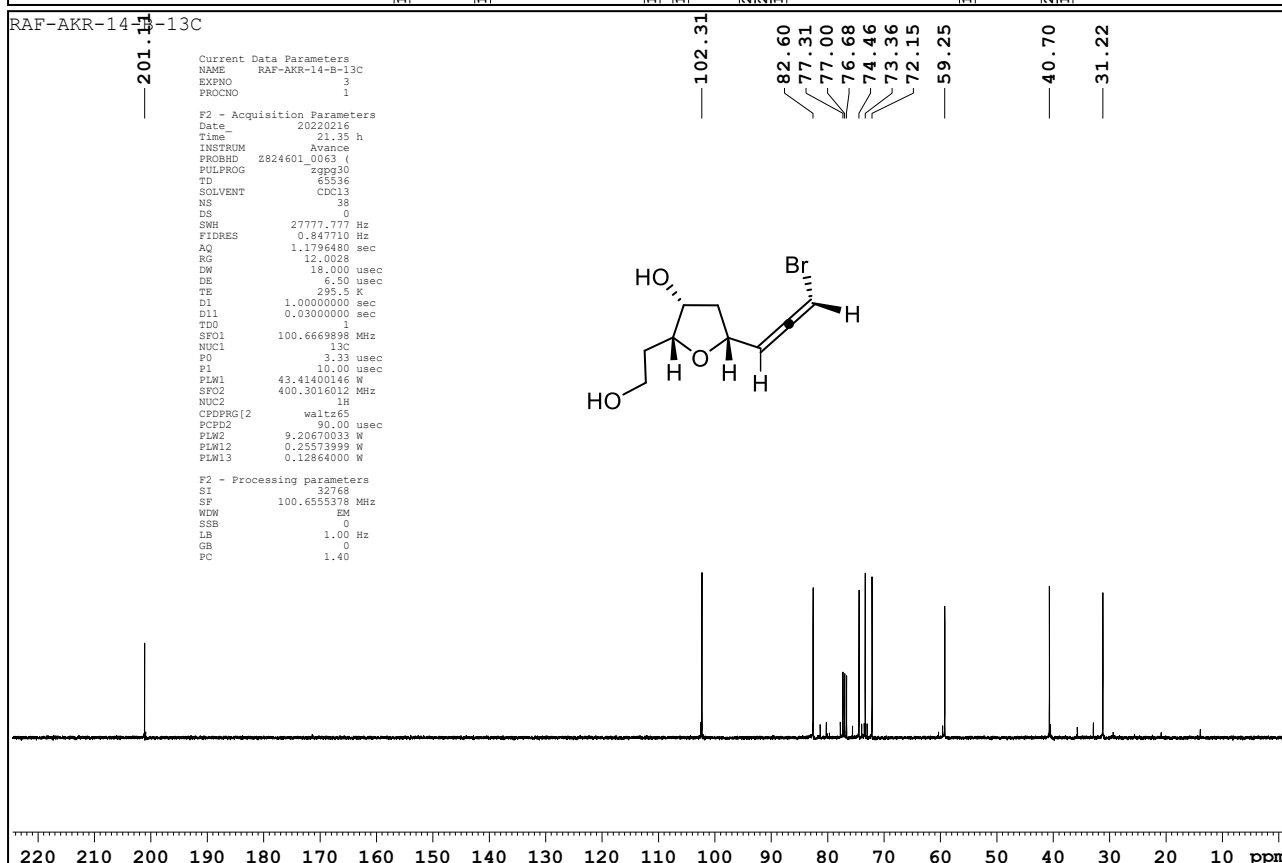

<sup>1</sup>H NMR (400 MHz, CDCl<sub>3</sub>) and <sup>13</sup>C{<sup>1</sup>H} NMR (100 MHz, CDCl<sub>3</sub>) of compound **15a**

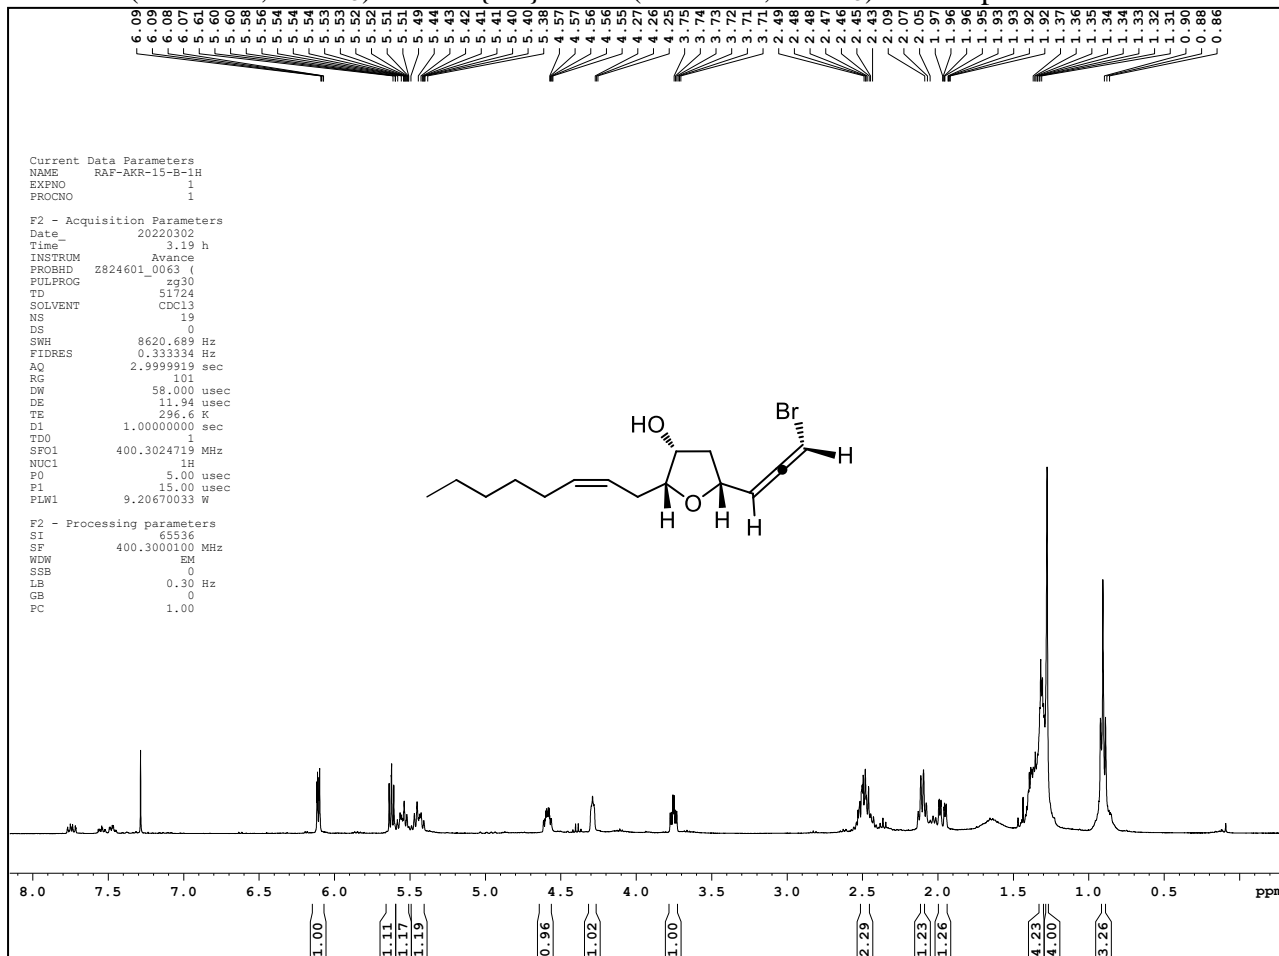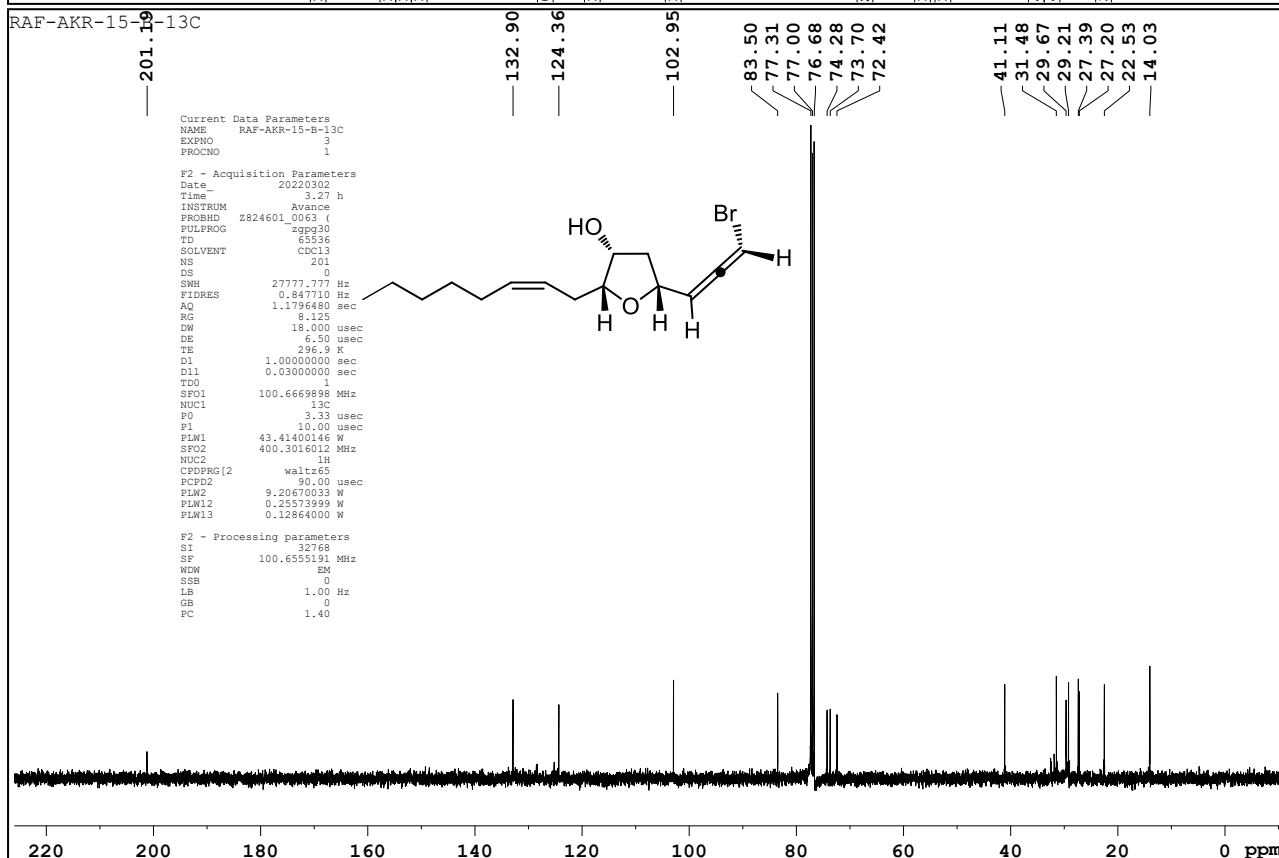

$^1\text{H}$  NMR (400 MHz,  $\text{C}_6\text{D}_6$ ) and  $^{13}\text{C}\{^1\text{H}\}$  NMR (100 MHz,  $\text{C}_6\text{D}_6$ ) of compound 4'

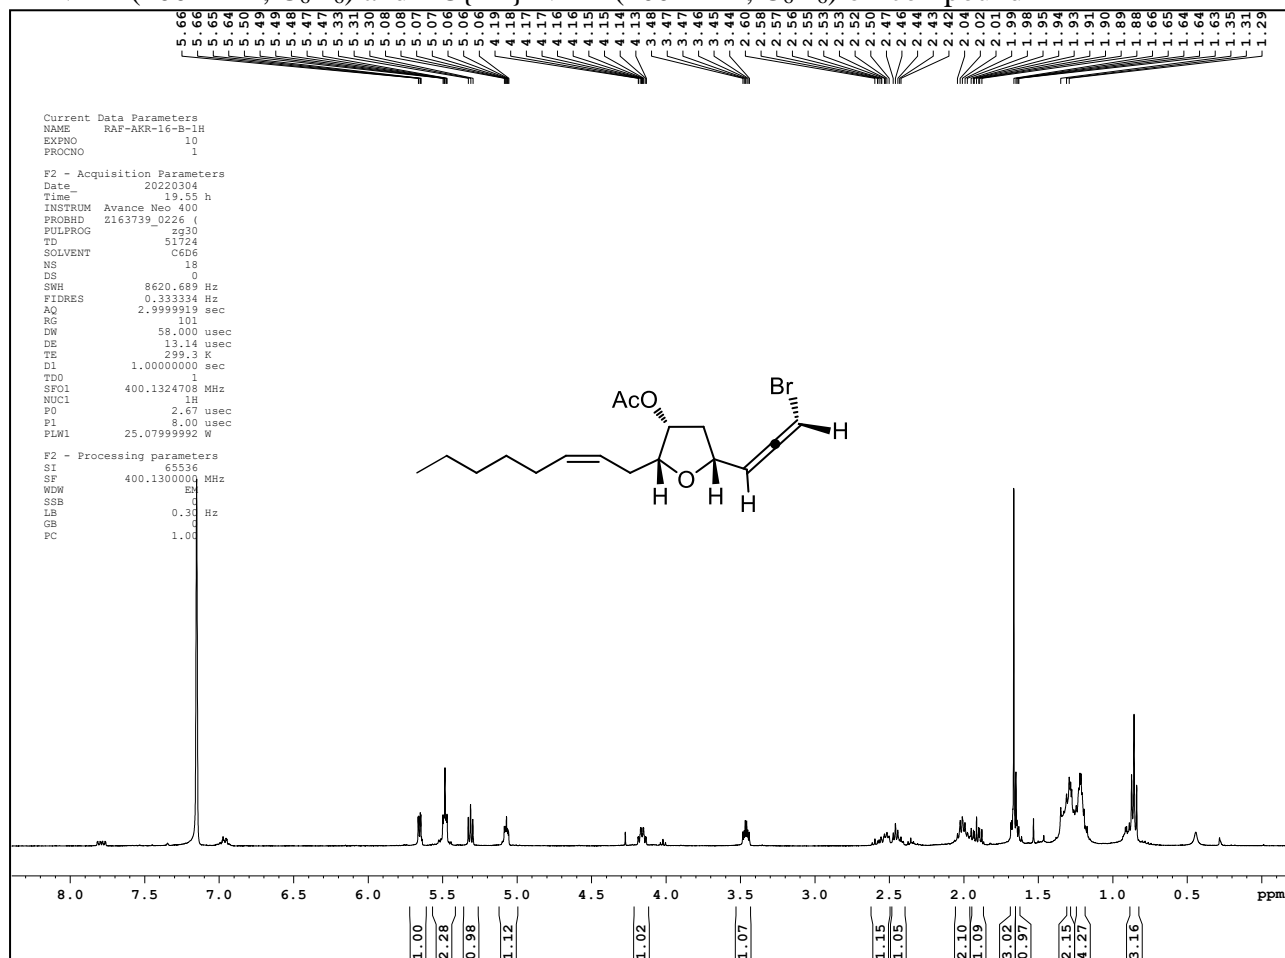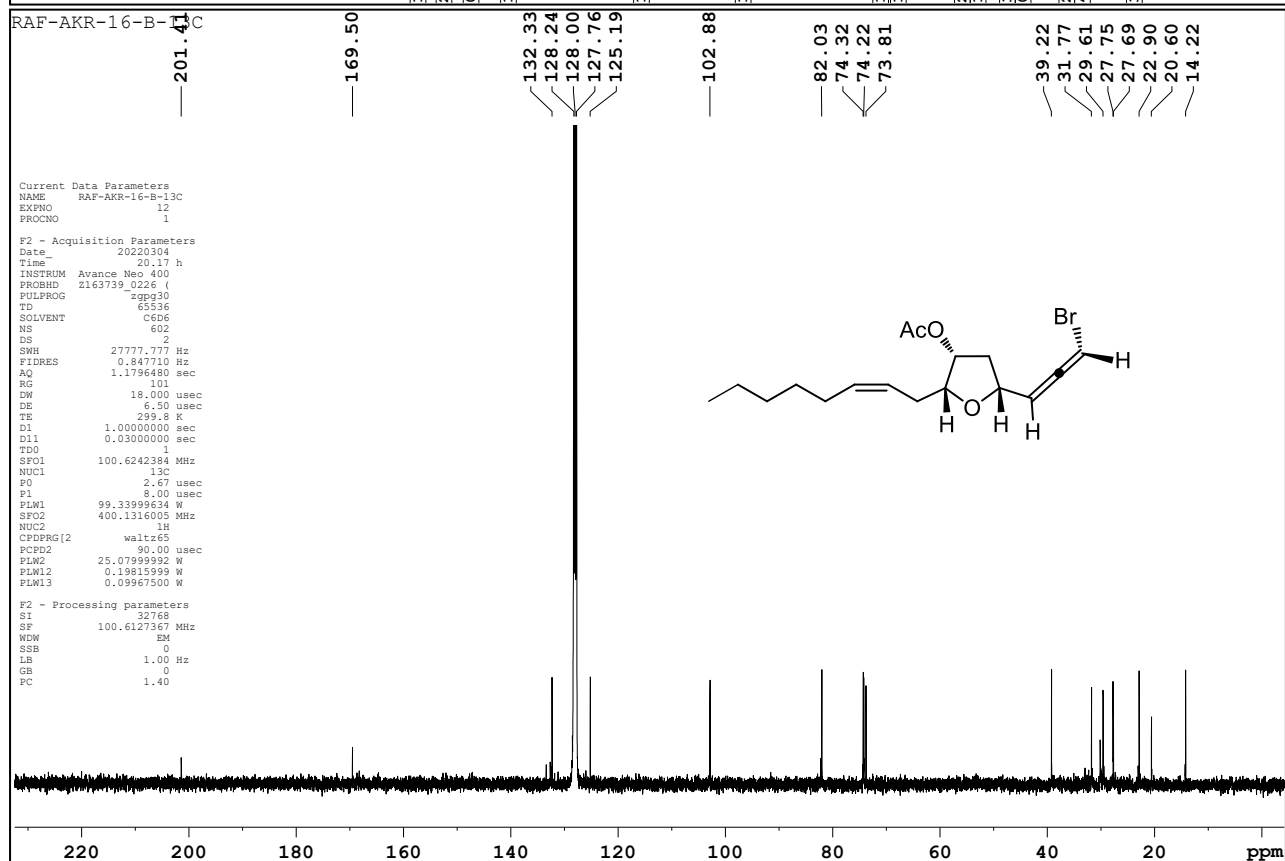



<sup>1</sup>H NMR (400 MHz, CDCl<sub>3</sub>) and <sup>13</sup>C{<sup>1</sup>H} NMR (100 MHz, CDCl<sub>3</sub>) of compound **13b**

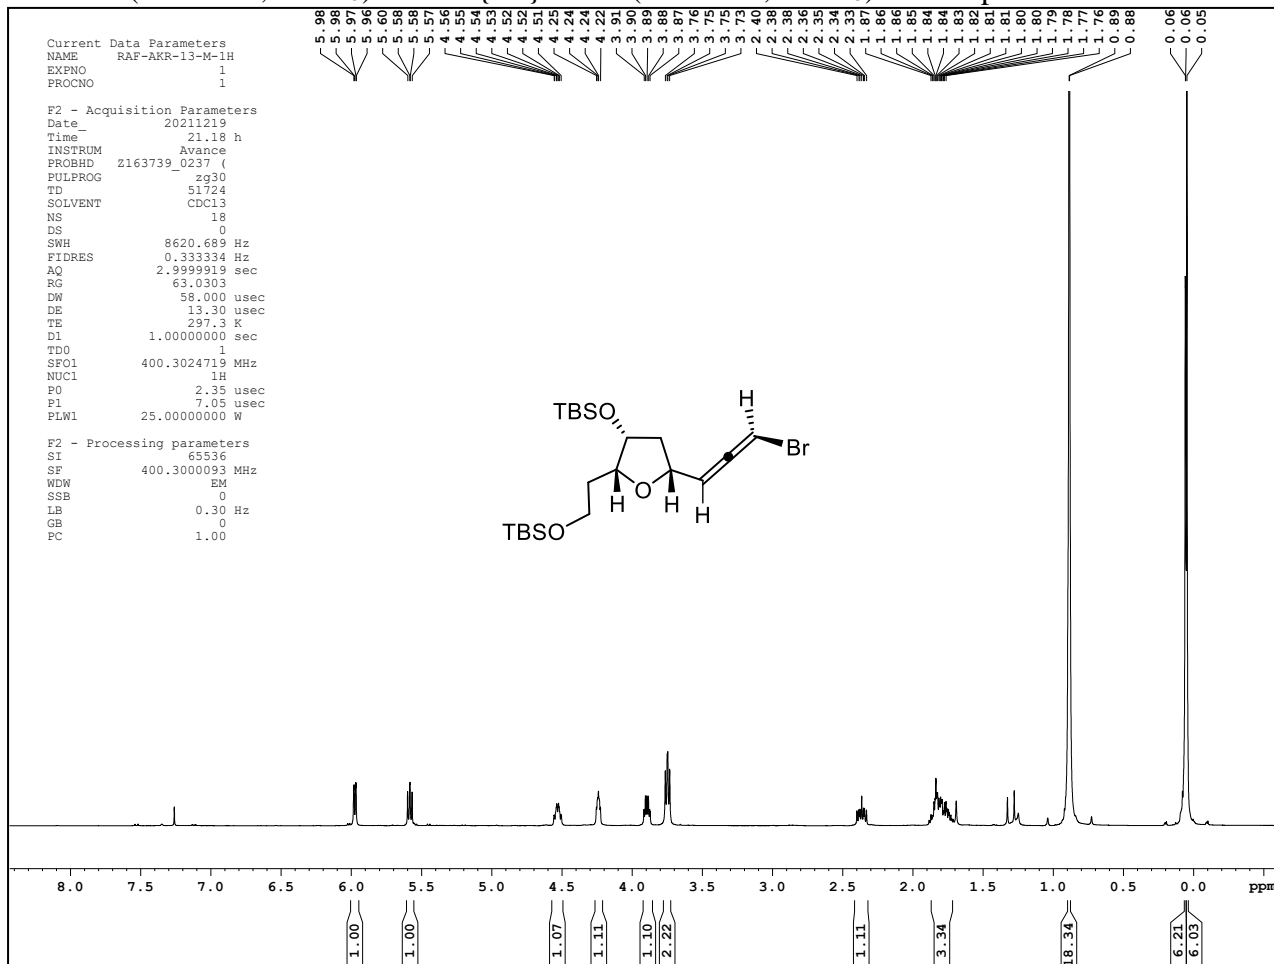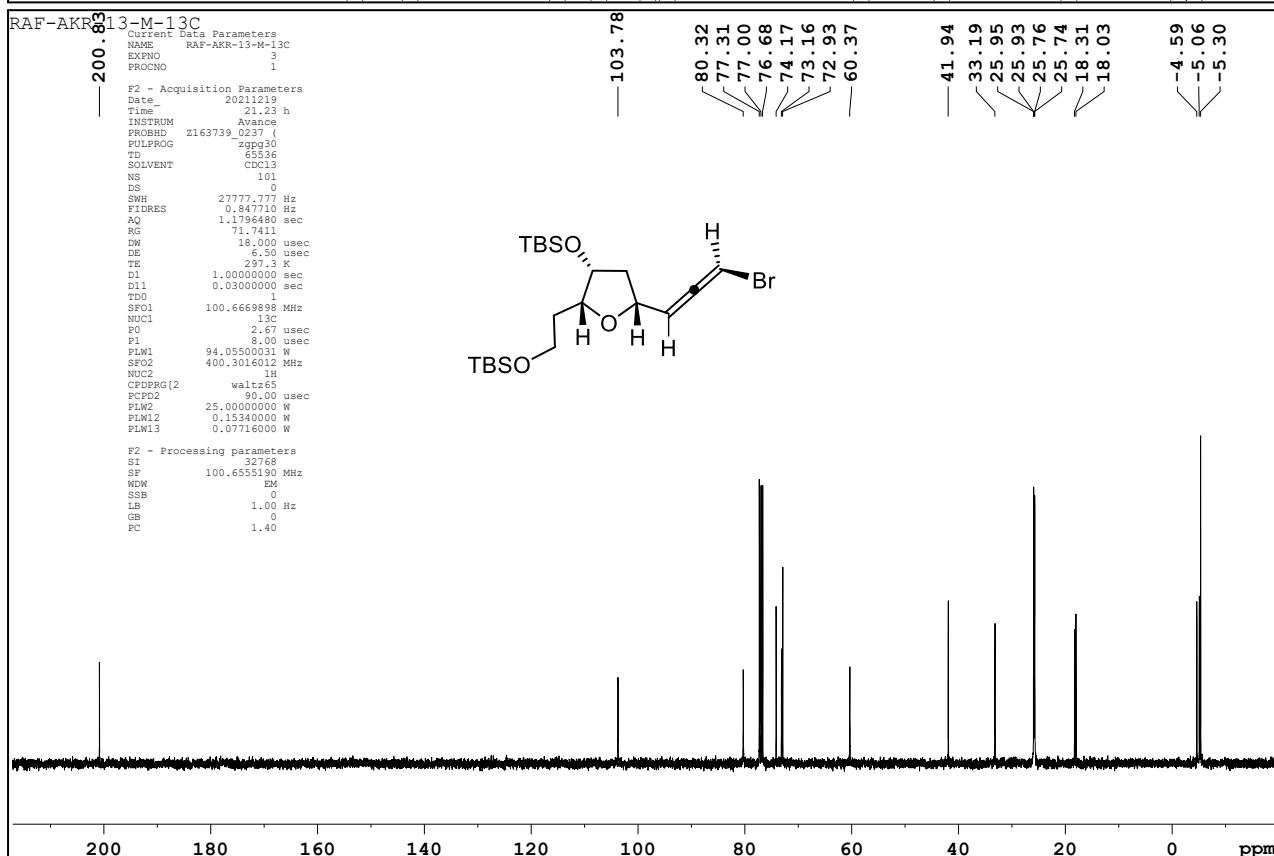

<sup>1</sup>H NMR (400 MHz, CDCl<sub>3</sub>) and <sup>13</sup>C{<sup>1</sup>H} NMR (100 MHz, CDCl<sub>3</sub>) of compound **14b**

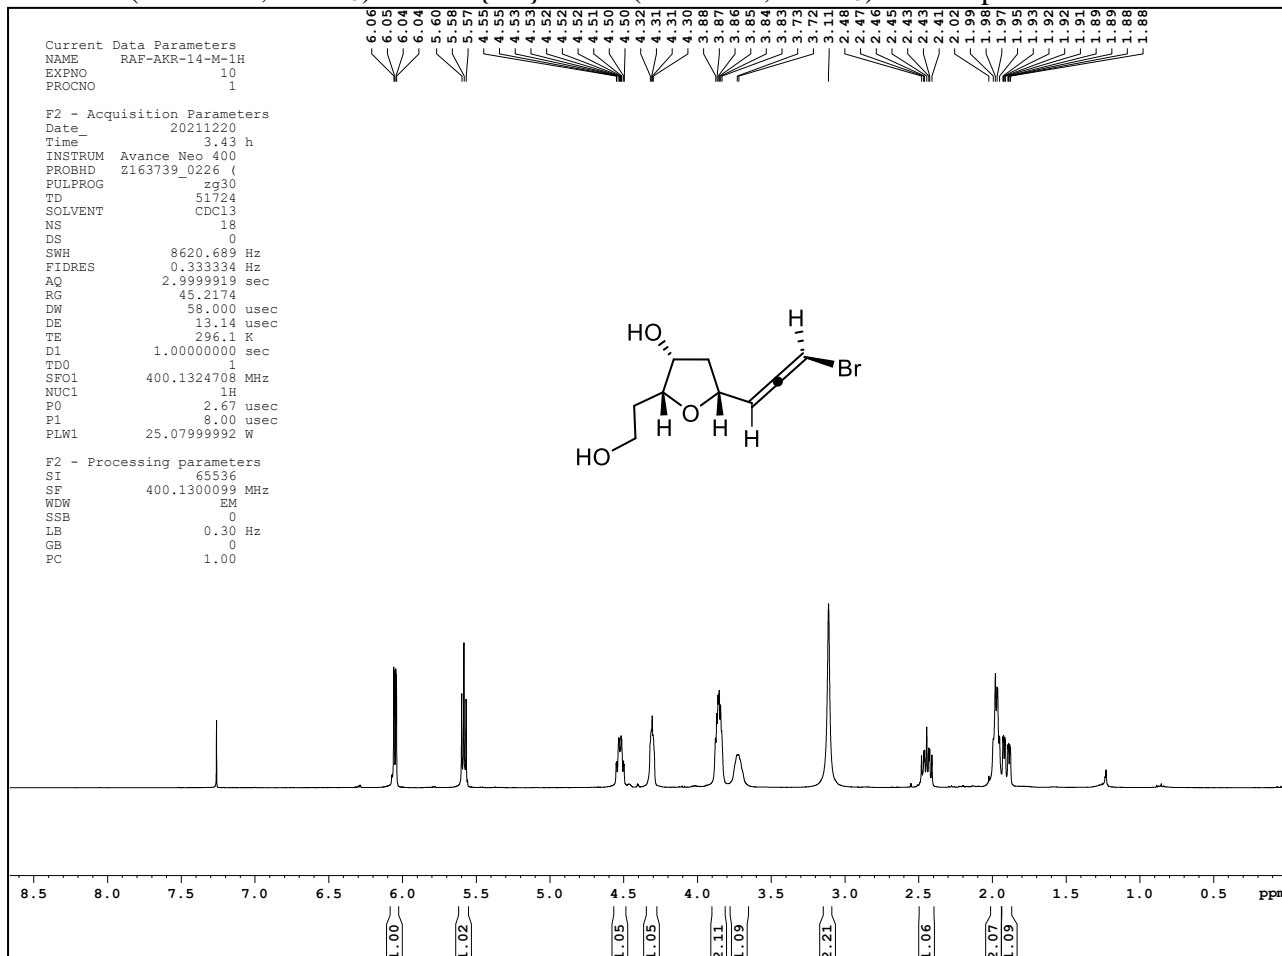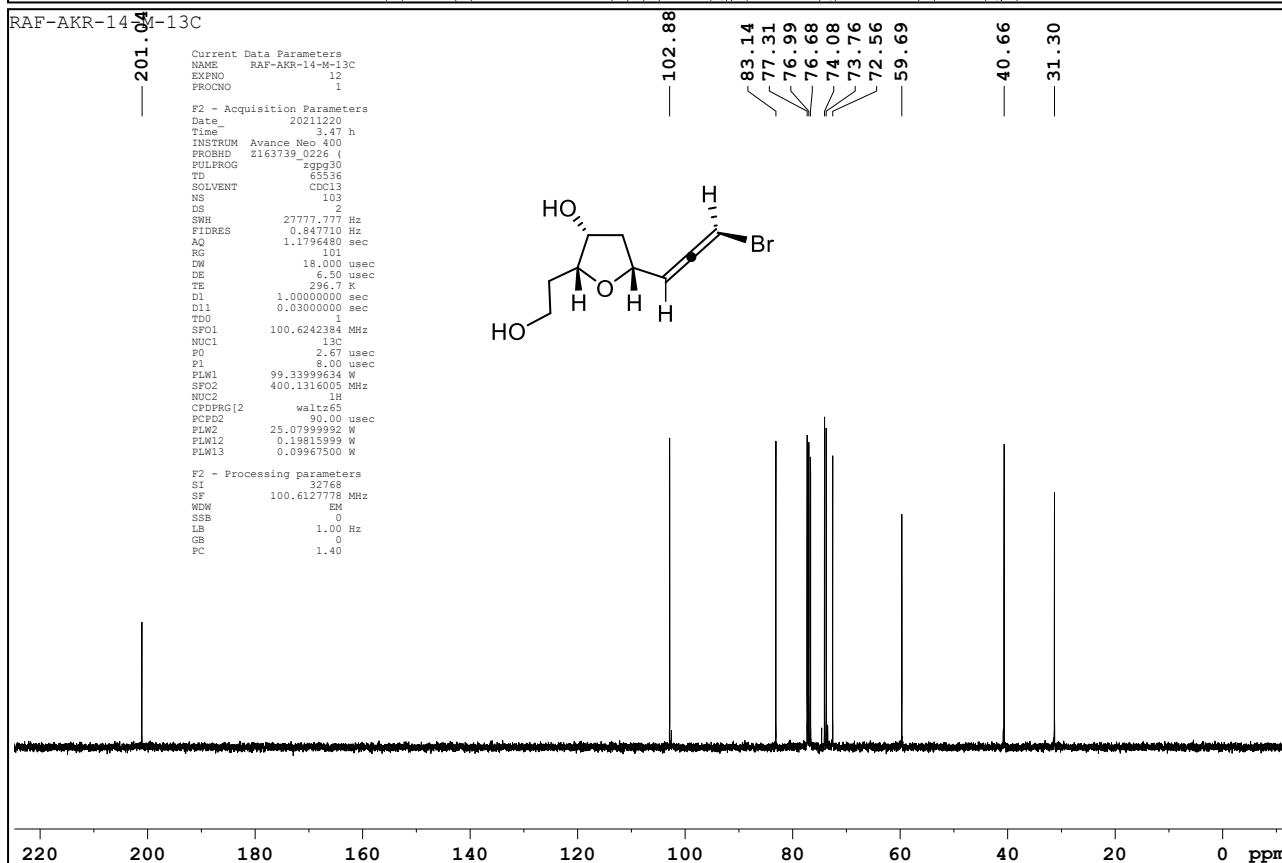



<sup>1</sup>H NMR (400 MHz, CDCl<sub>3</sub>) and <sup>13</sup>C{<sup>1</sup>H} NMR (125 MHz, CDCl<sub>3</sub>) of compound **15b**

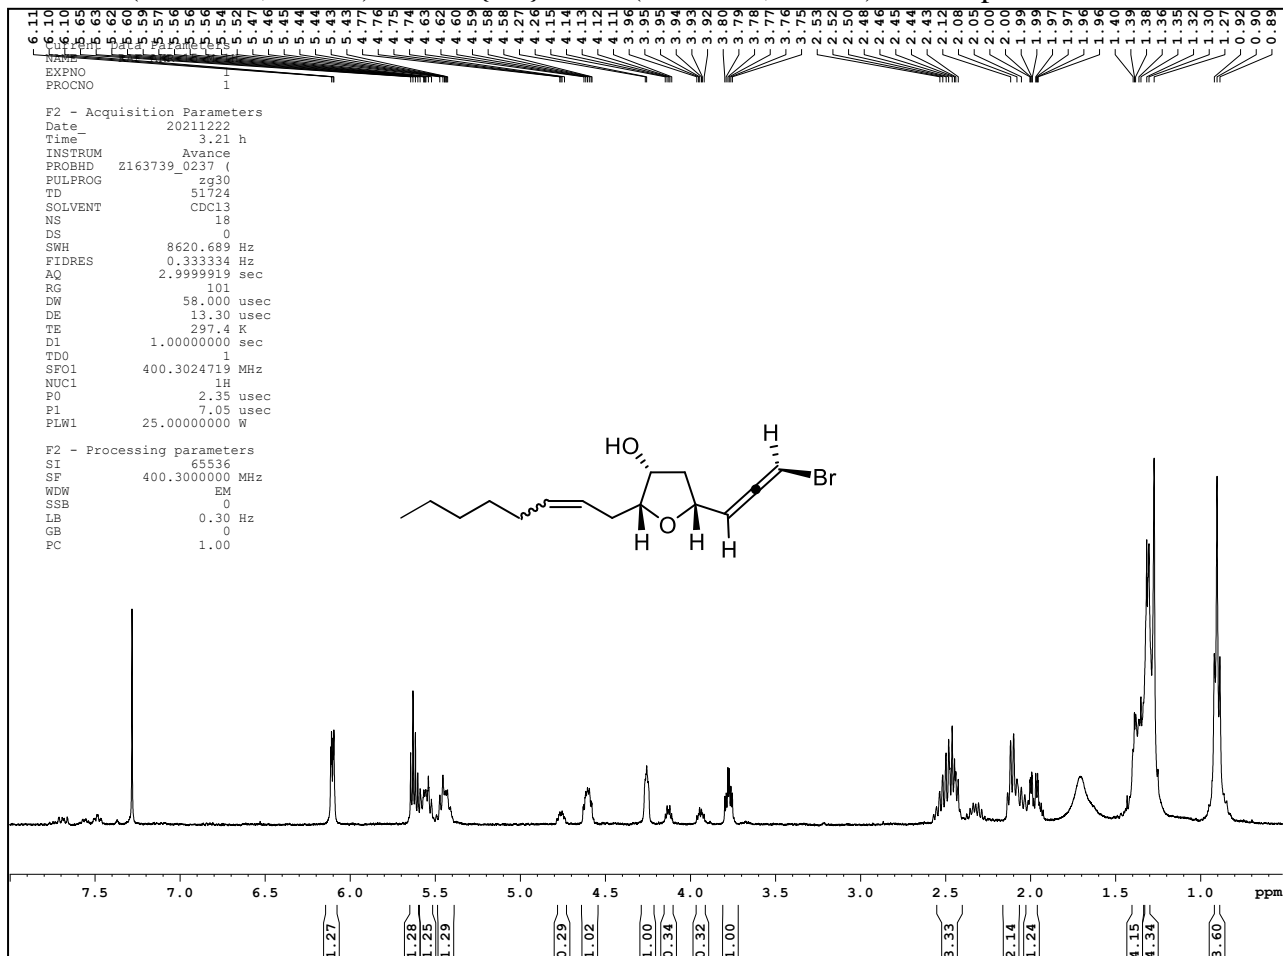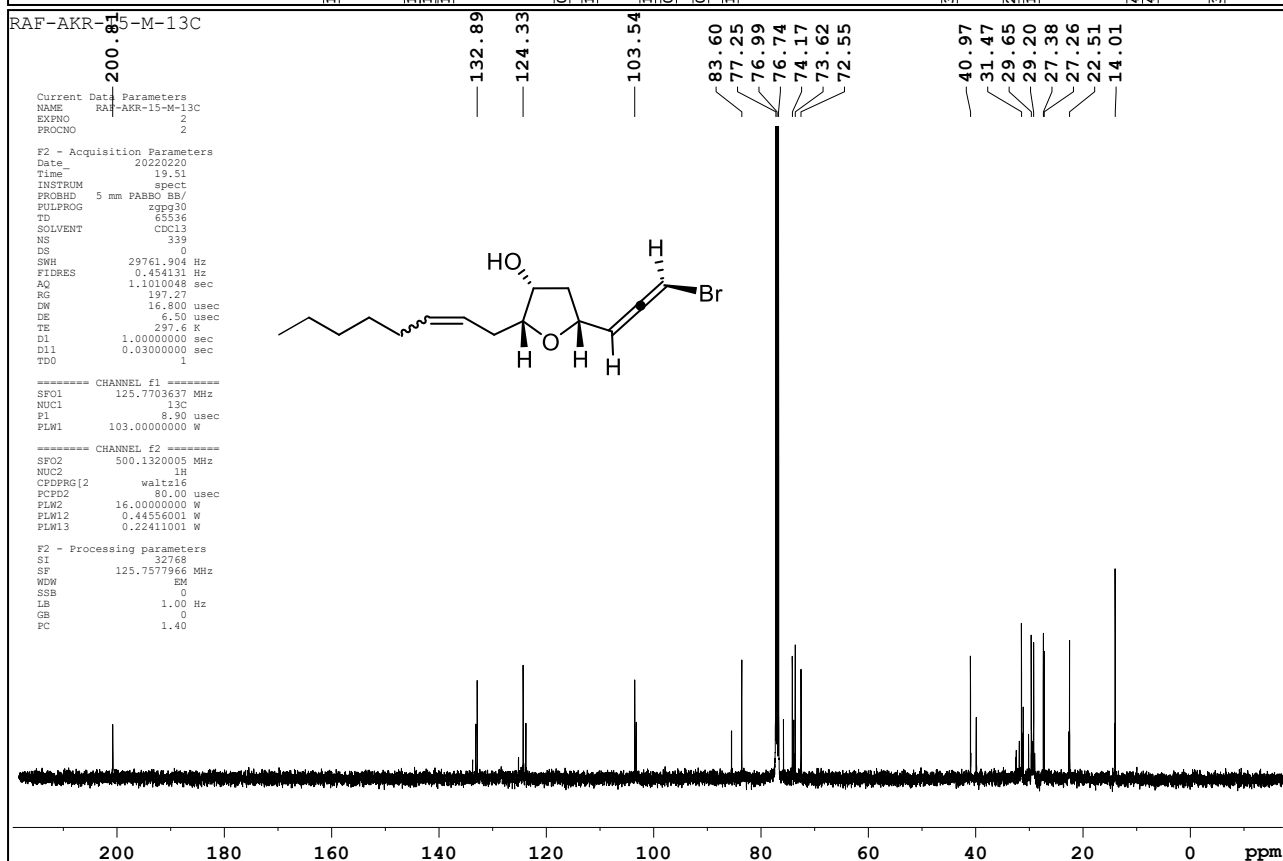



$^{13}\text{C}\{^1\text{H}\}$  NMR (125 MHz,  $\text{C}_6\text{D}_6$ ) of compound 4

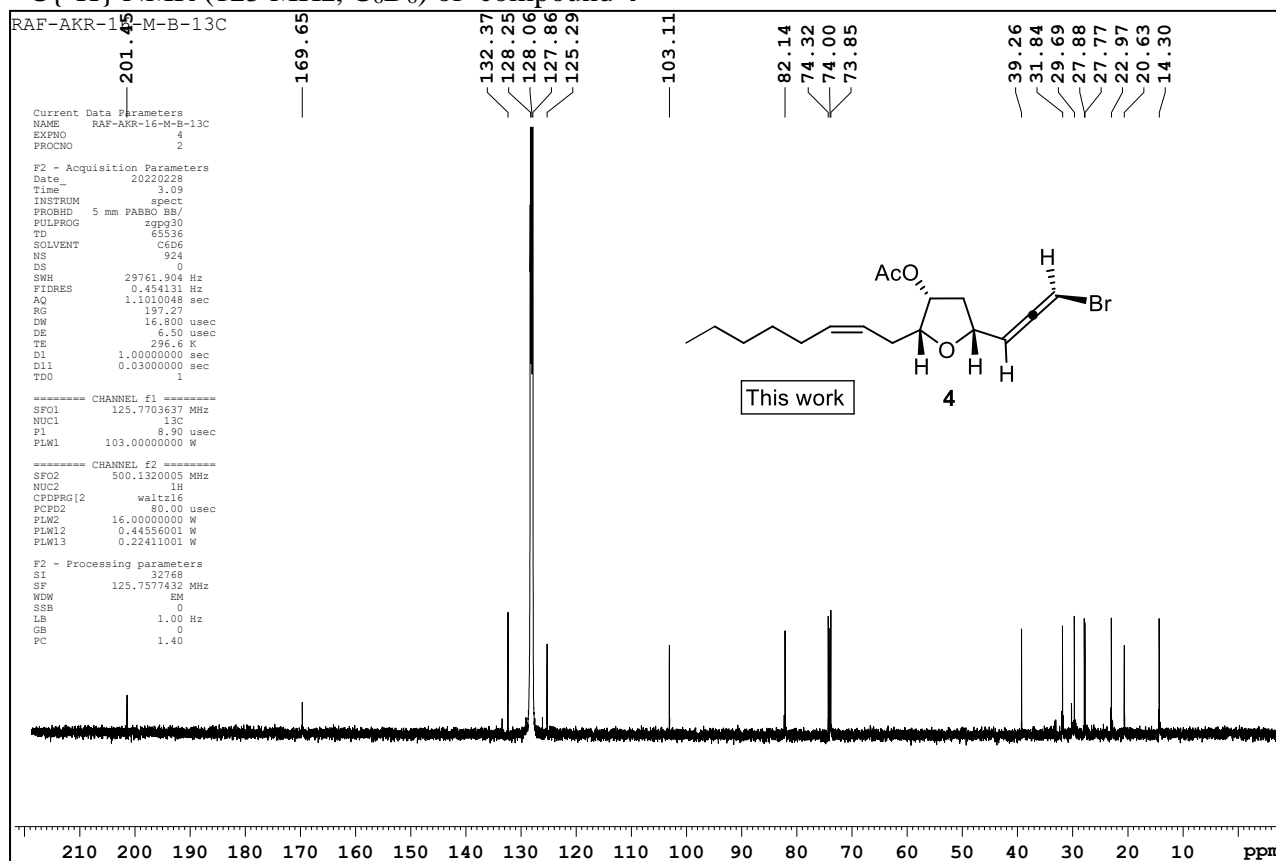

**NOTE:**  $^{13}\text{C}$  NMR spectra copy of isolated natural product is not available for spectra comparison.

COSY of compound 4

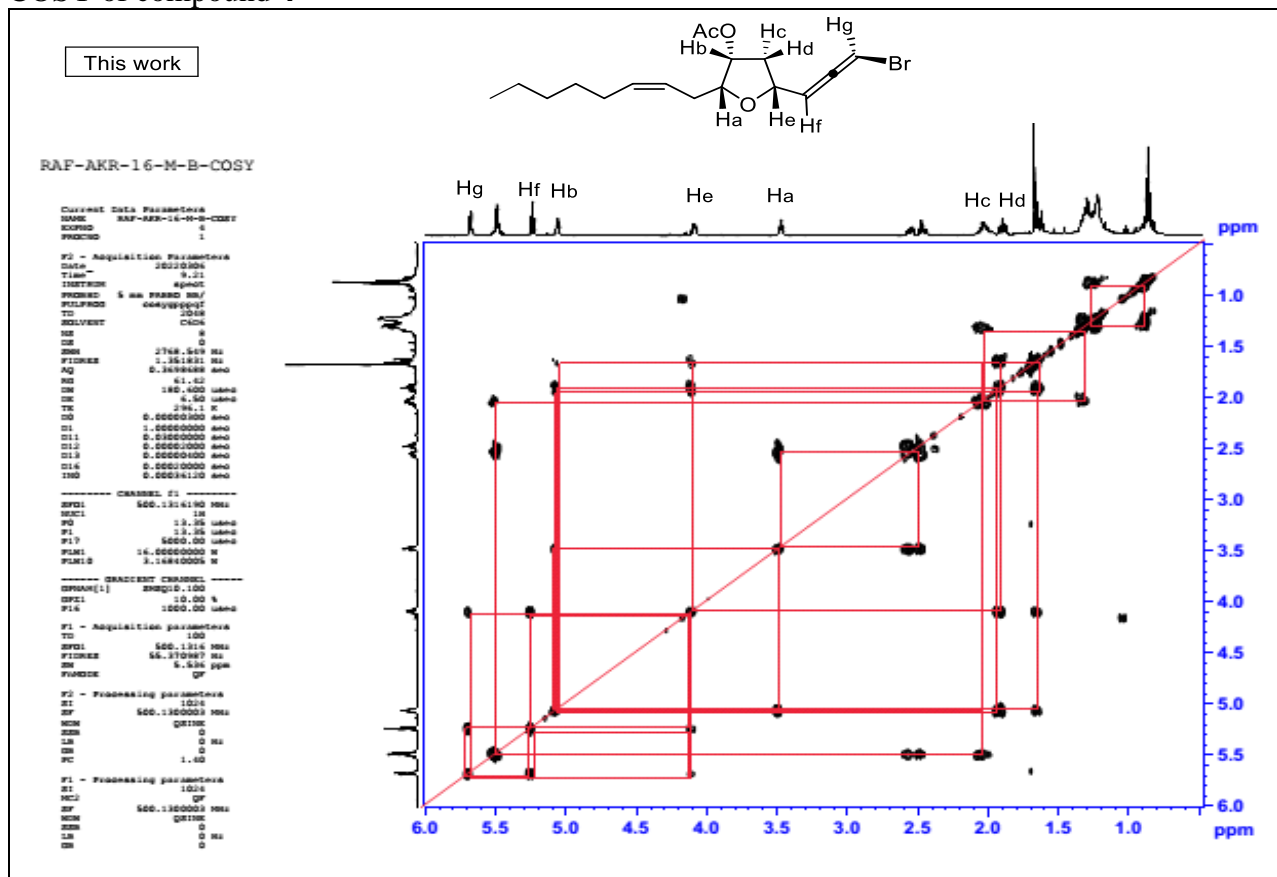

COSY of compound 4 reported [Molecules 2012, 17, 2119]

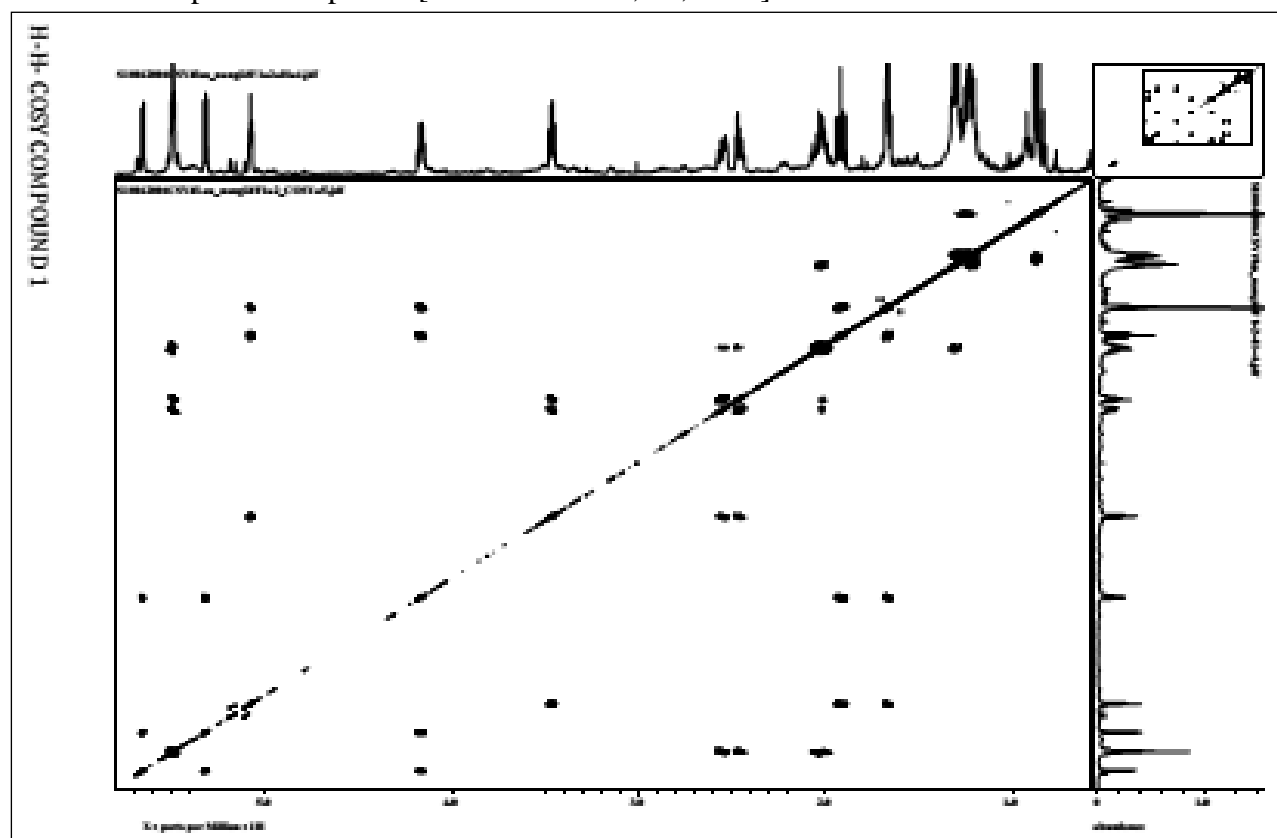

HSQC of compound 4 and reported spectra

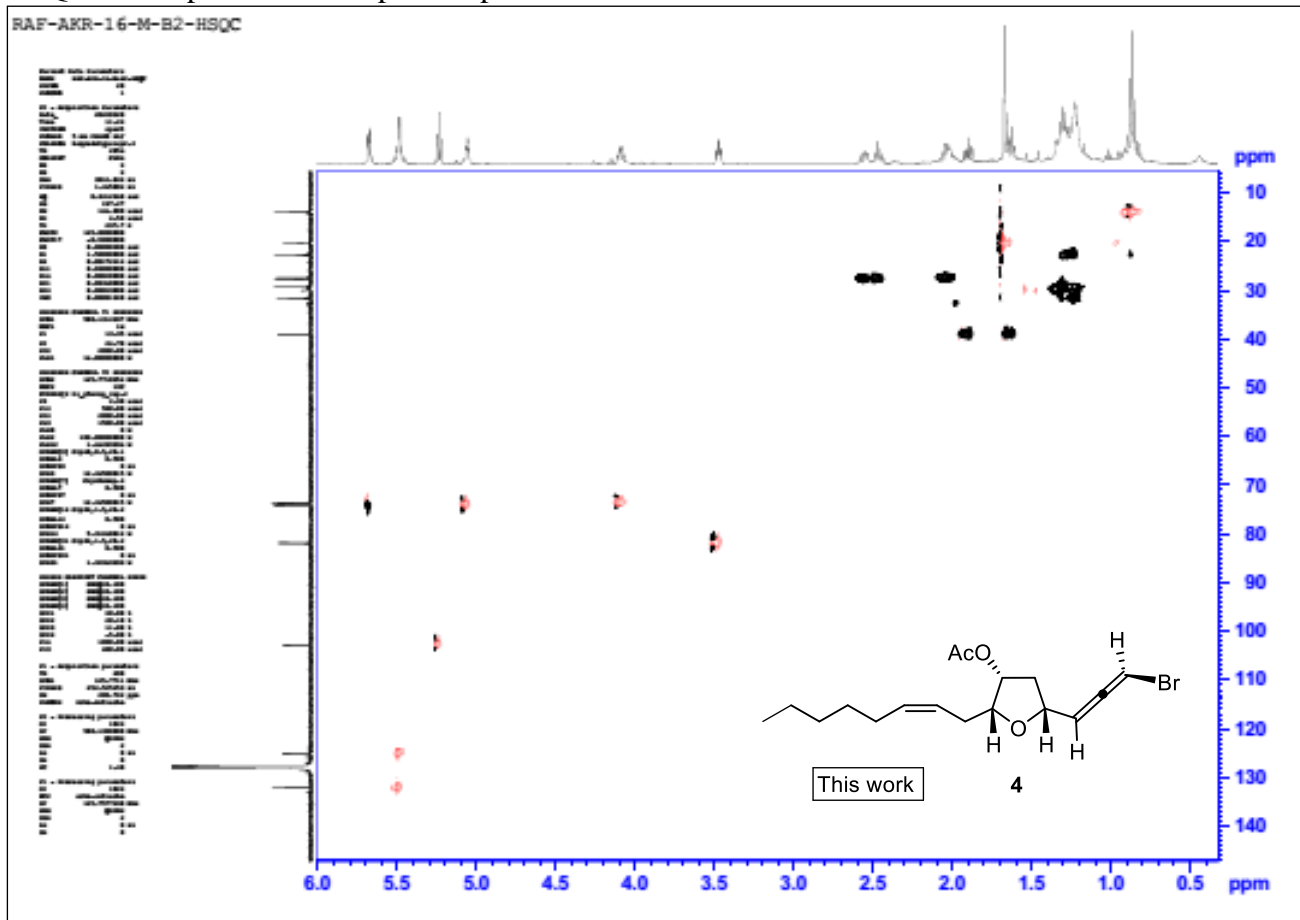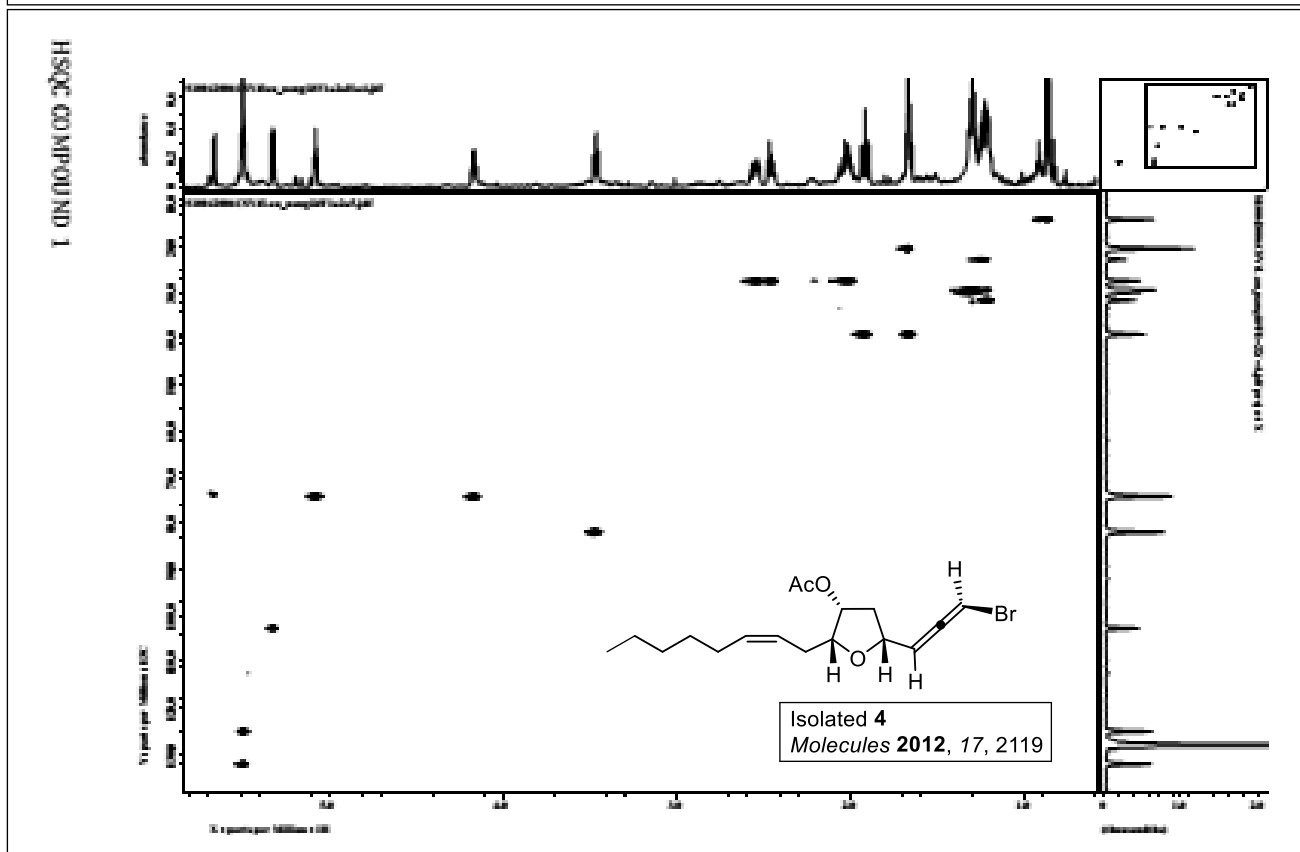

Comparison data of (+)-dihydroitomanallene B (4): Isolation and our data

| Isolated Compound Data<br><i>Molecules 2012, 17, 2119</i> |                     | Our Work Data                                |                     |
|-----------------------------------------------------------|---------------------|----------------------------------------------|---------------------|
| <sup>1</sup> H-NMR                                        | <sup>13</sup> C-NMR | <sup>1</sup> H-NMR                           | <sup>13</sup> C-NMR |
| 5.66 (dd, <i>J</i> = 5.8, 2.0 Hz, 1H)                     | 73.5                | 5.68 (dd, <i>J</i> = 5.7, 1.8 Hz, 1H)        | 73.3                |
|                                                           | 201.5               |                                              | 201.5               |
| 5.32 (dd, <i>J</i> = 5.8, 5.8 Hz, 1H)                     | 102.6               | 5.24 (t, <i>J</i> = 5.7 Hz, 1H)              | 103.1               |
| 4.16 (dddd, <i>J</i> = 7.3, 5.8, 5.4, 2.0 Hz, 1H)         | 74.0                | 4.12–4.07 (m, 1H)                            | 74.0                |
| 1.92 (ddd, <i>J</i> = 13.7, 5.4, 1.5 Hz, 1H)              | 38.9                | 1.91 (ddd, <i>J</i> = 14.4, 8.4, 6.1 Hz, 1H) | 39.3                |
| 1.67 (m, 1H)                                              |                     | 1.65–1.61 (m, 1H)                            |                     |
| 5.08 (m, 1H)                                              | 73.9                | 5.07 (dd, <i>J</i> = 6.7, 2.9 Hz, 1H)        | 73.9                |
| 3.47 (ddd, <i>J</i> = 7.3, 7.3, 3.4 Hz, 1H)               | 81.8                | 3.48 (td, <i>J</i> = 6.8, 3.8 Hz, 1H)        | 82.1                |
| 2.54 (ddd, <i>J</i> = 13.7, 7.3, 3.4 Hz, 1H)              | 27.5                | 2.60–2.52 (m, 1H)                            | 27.9                |
| 2.46 (ddd, <i>J</i> = 13.7, 7.3, 3.4 Hz, 1H)              |                     | 2.48 (dd, <i>J</i> = 13.6, 7.1 Hz, 1H)       |                     |
| 5.49 (m, 1H)                                              | 124.9               | 5.53–5.46 (m, 2H)                            | 125.3               |
| 5.49 (m, 1H)                                              | 132.1               |                                              | 132.4               |
| 2.02 (m, 2H)                                              | 27.4                | 2.07–2.00 (m, 2H)                            | 27.8                |
| 1.30 (m, 2H)                                              | 29.4                | 1.35–1.28 (m, 2H)                            | 29.7                |
| 1.22 (m, 2H)                                              | 31.5                | 1.26–1.21 (m, 4H)                            | 31.8                |
| 1.24 (m, 2H)                                              | 22.7                |                                              | 23.0                |
| 0.87 (t, <i>J</i> = 7.3 Hz, 3H)                           | 13.9                | 0.87 (t, <i>J</i> = 6.8 Hz, 3H)              | 14.3                |
| -                                                         | 169.5               |                                              | 169.7               |
| 1.67 (s, 1H)                                              | 20.4                | 1.68 (s, 3H)                                 | 20.6                |

<sup>1</sup>H NMR (400 MHz, C<sub>6</sub>D<sub>6</sub>) and <sup>13</sup>C{<sup>1</sup>H} NMR (125 MHz, C<sub>6</sub>D<sub>6</sub>) of compound 4''

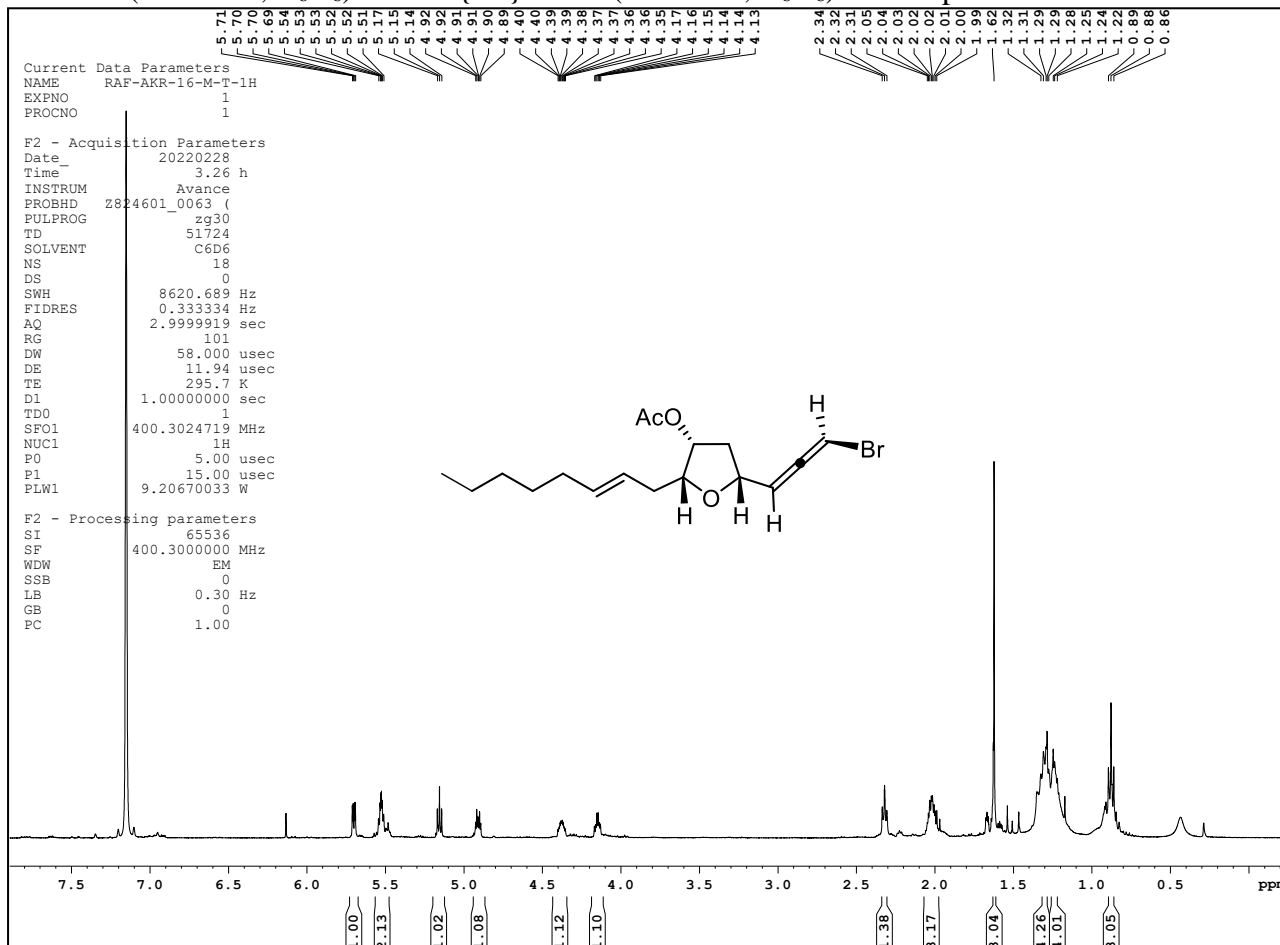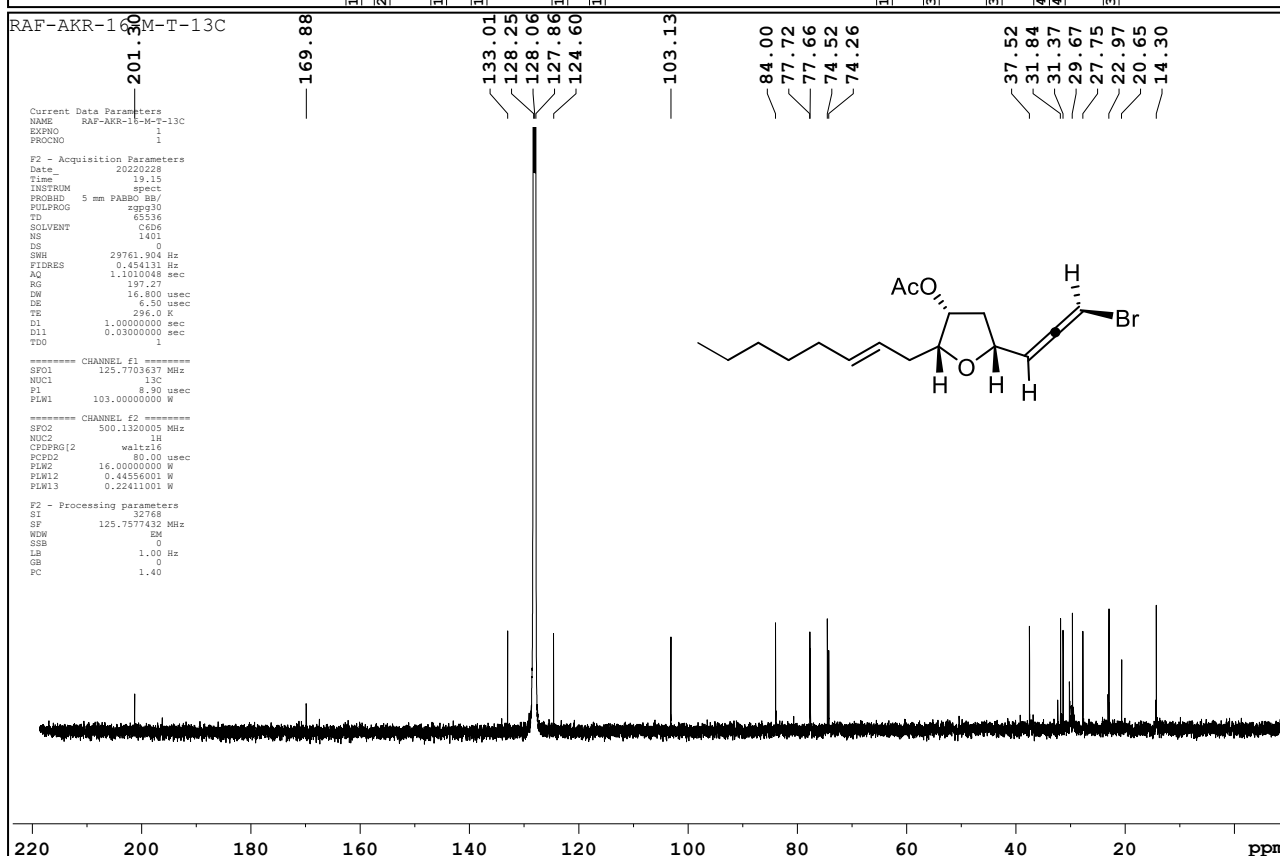

<sup>1</sup>H NMR(500 MHz, CDCl<sub>3</sub>) and <sup>13</sup>C{<sup>1</sup>H} NMR(100 MHz, CDCl<sub>3</sub>) of compound **16**

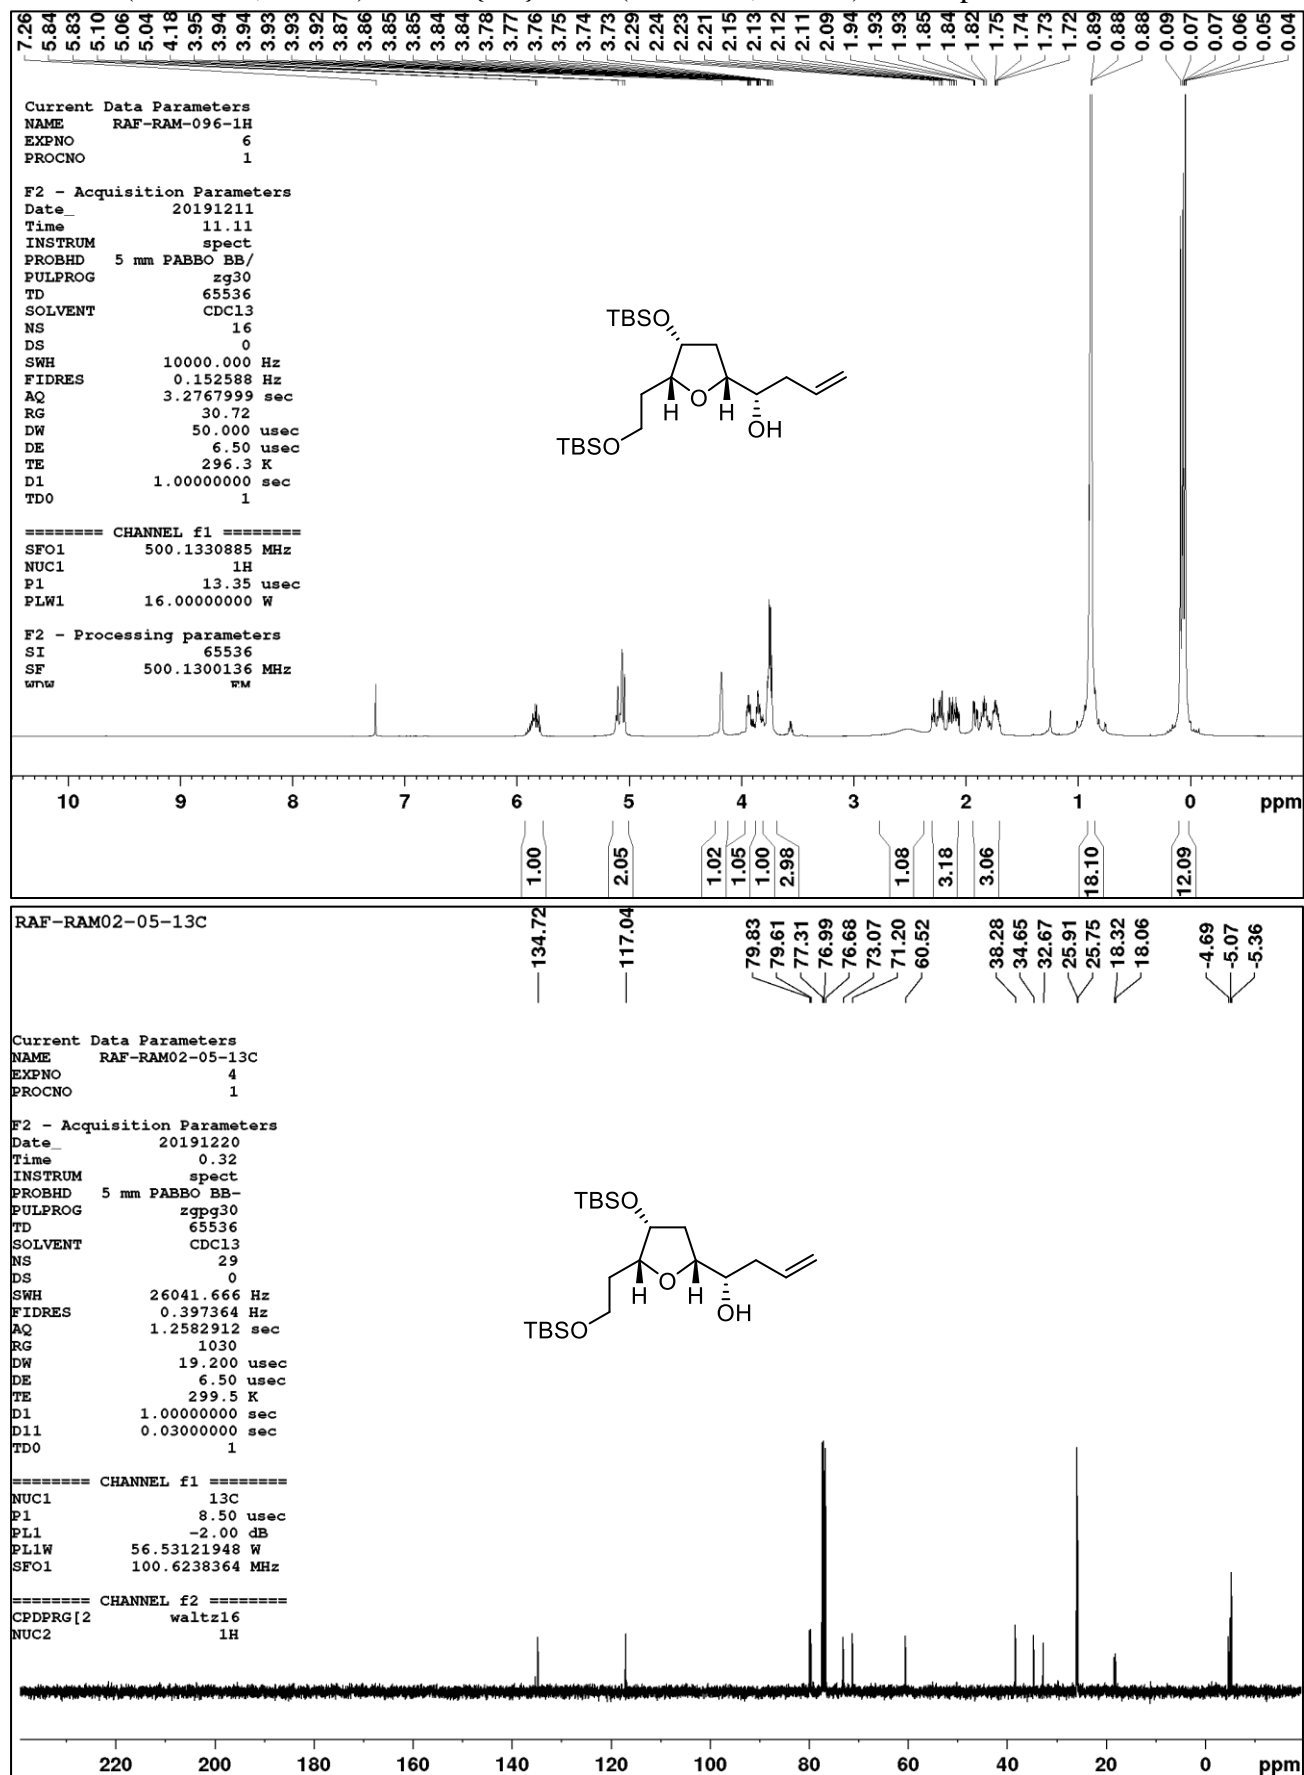



$^1\text{H}$  NMR(400 MHz,  $\text{CDCl}_3$ ) and  $^{13}\text{C}\{^1\text{H}\}$  NMR(100 MHz,  $\text{CDCl}_3$ ) of compound **17**

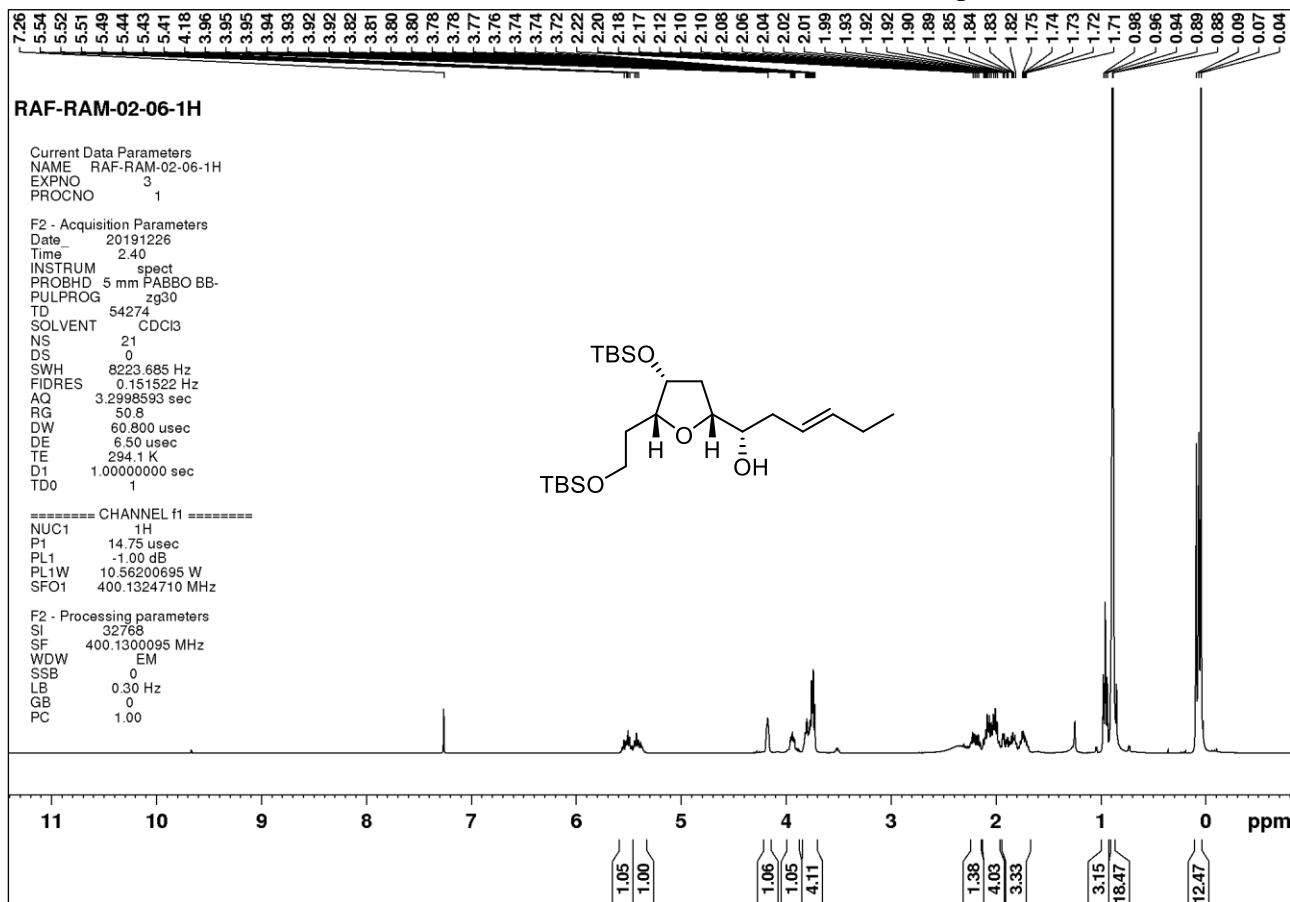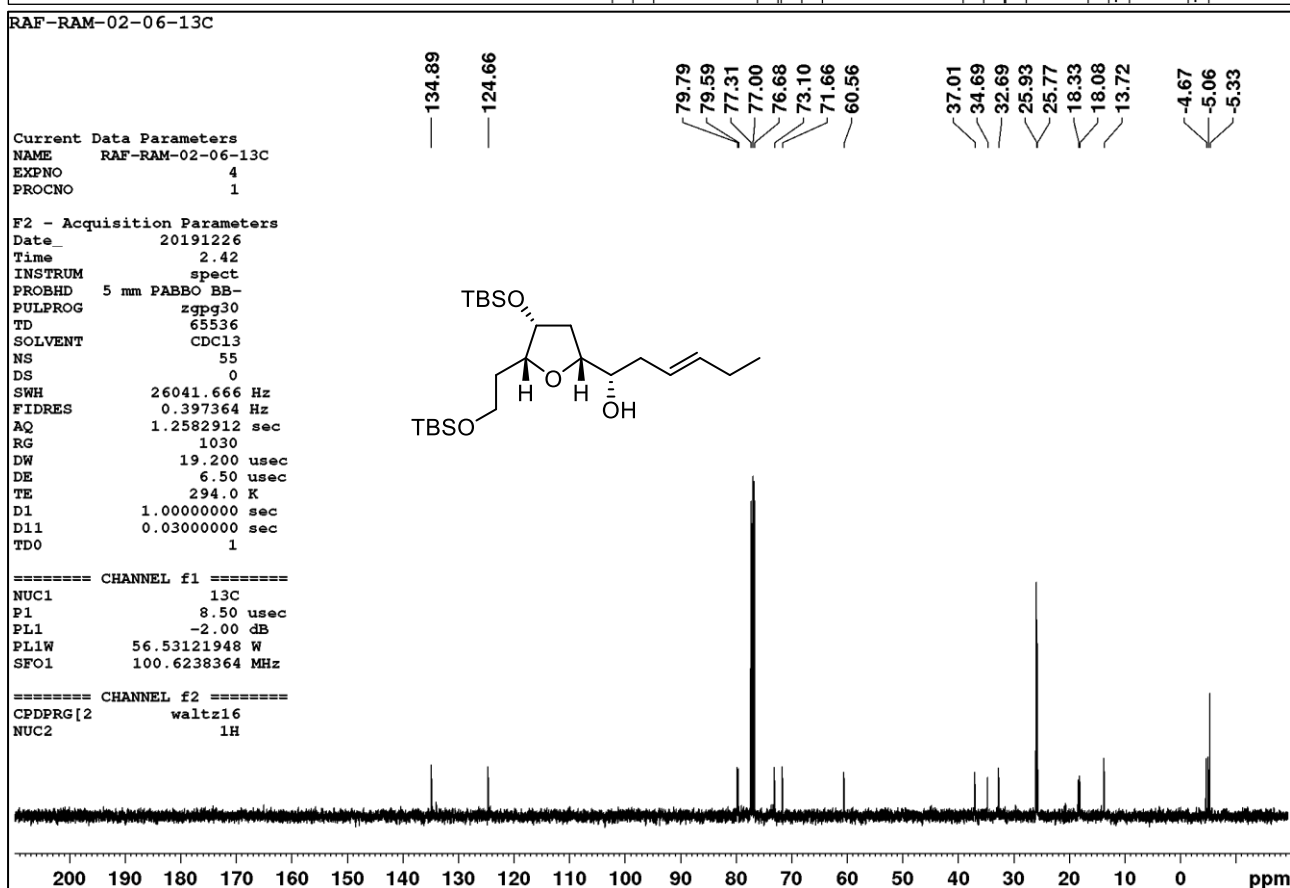



$^{13}\text{C}\{^1\text{H}\}$  NMR (100 MHz,  $\text{CDCl}_3$ ) of compound **11** and reported compound **11** spectra

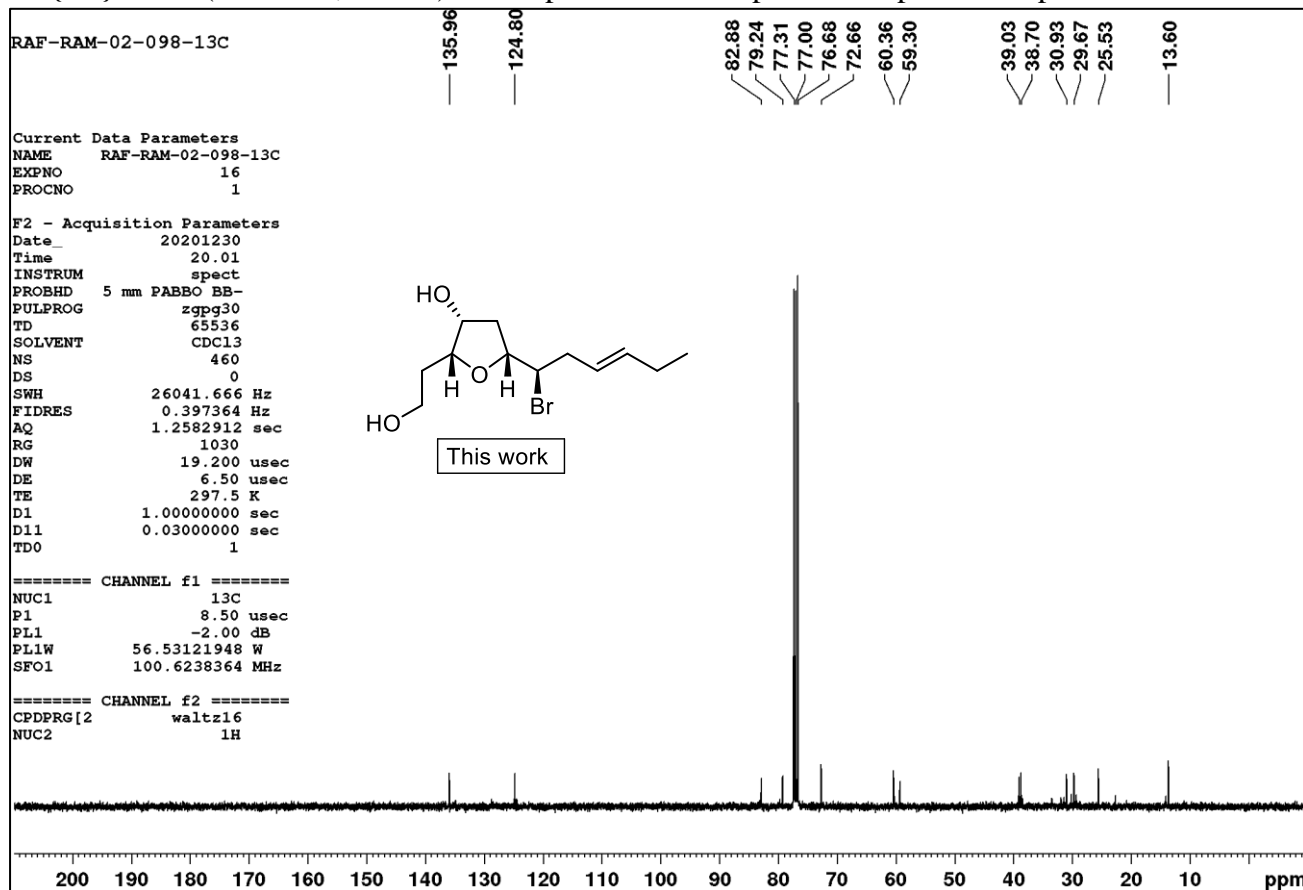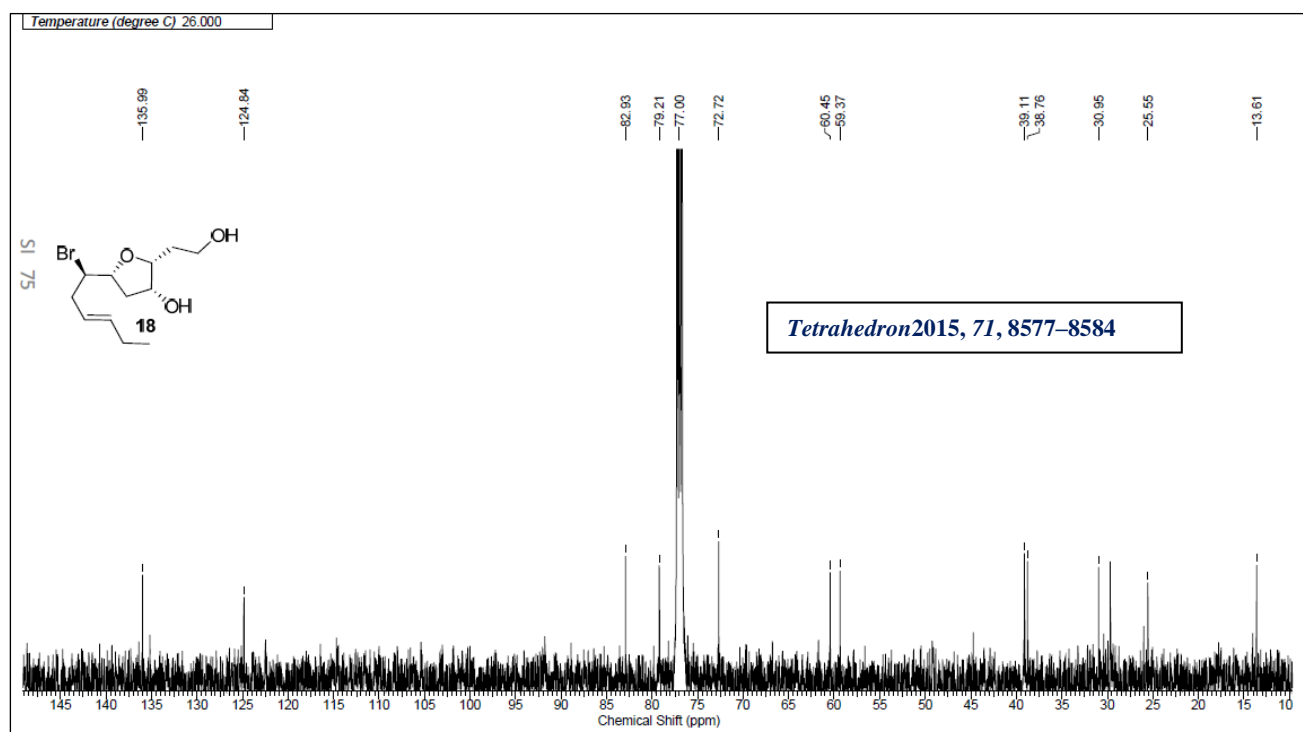

Comparison data of Compound **11**: Reported and our work

| <b><sup>1</sup>H NMR</b><br><b>Ramana (<i>Tetrahedron</i> 2015, 17, 8577)</b> | <b><sup>1</sup>H NMR our work</b>             |
|-------------------------------------------------------------------------------|-----------------------------------------------|
| 5.61 (dt, $J = 6.3, 15.4$ Hz, 1H)                                             | 5.60 (dt, $J = 15.2, 6.4$ Hz, 1H)             |
| 5.47 (dt, $J = 7.1, 15.4$ Hz, 1H)                                             | 5.45 (dt, $J = 15.2, 7.0$ Hz, 1H)             |
| 4.28–4.27 (m, 1H)                                                             | 4.27–4.25 (m, 1H)                             |
| 4.07 (dt, $J = 4.6, 8.2$ Hz, 1H), 4.02 (ddd, $J = 4.3, 6.1, 10.4$ Hz, 1H)     | 4.08–3.98 (m, 2H)                             |
| 3.89 (ddd, $J = 3.7, 7.0, 10.7$ Hz, 1H), 3.83–3.78 (m, 2H)                    | 3.91–3.76 (m, 3H)                             |
| 2.72–2.67 (m, 1H), 2.65–2.59 (m, 1H)                                          | 2.71–2.59 (m, 2H)                             |
| 2.41 (ddd, $J = 6.7, 8.5, 14.9$ Hz, 1H)                                       | 2.40 (ddd, $J = 15.0, 8.4, 6.4$ , 1H) (m, 1H) |
| 2.02–1.95 (m, 1H), 2.09–2.03 (m, 3H)                                          | 2.08–1.94 (m, 4H)                             |
| 1.87 (ddd, $J = 1.5, 6.1, 14.3$ Hz, 1H)                                       | 1.86 (ddd, $J = 14.4, 6.0, 1.6$ Hz, 1H)       |
| 0.99 (t, $J = 7.5$ Hz, 3H)                                                    | 0.98 (t, $J = 7.5$ Hz, 3H)                    |

| <b><sup>13</sup>C NMR</b><br><b>Ramana (<i>Tetrahedron</i> 2015, 17, 8577)</b> | <b><sup>13</sup>C NMR our work</b> |
|--------------------------------------------------------------------------------|------------------------------------|
| 136.0                                                                          | 136.0                              |
| 124.8                                                                          | 124.8                              |
| 82.9                                                                           | 82.9                               |
| 79.2                                                                           | 79.2                               |
| 72.7                                                                           | 72.7                               |
| 60.4                                                                           | 60.4                               |
| 59.4                                                                           | 59.3                               |
| 39.1                                                                           | 39.0                               |
| 38.8                                                                           | 38.7                               |
| 30.9                                                                           | 30.9                               |
| 25.5                                                                           | 25.5                               |
| 13.6                                                                           | 13.6                               |
